# Supplementary material
Source: PubMed Central journal article supplement (PMC4892348)
Supplement: NIHMS68580-supplement-Appendix_Tables_and_Figures.pdf [file NIHMS68580-supplement-Appendix_Tables_and_Figures.pdf]

## Appendix A: Spectroscopy of CH<sub>3</sub>NCO

Thorough analysis of the rotational spectrum of a target molecule is a crucial step that enables astrophysical detection. In the case of CH<sub>3</sub>NCO the understanding of the rotational spectrum, and thus delivery of suitable line lists for astrophysical use has been considerably delayed by the complications arising from the presence of two large amplitude internal motions in this molecule. The first laboratory studies were carried out around half a century ago (Curl et al. 1963; Lett et al. 1967) when it was found that the molecule has a very low barrier to internal rotation of the methyl group and also a low-frequency bending mode. In the 1980s those studies were greatly extended by Koput (1984, 1986, 1988). His use of Stark spectroscopy allowed the unambiguous assignment of transitions for different values of  $K$ . The use of a semi-rigid rotor Hamiltonian and relative intensity considerations allowed the assignment of the vibrational quantum numbers  $m$  and  $v_b$ . In this way a very self-consistent picture of the complex vibrational energy structure was reached, as already described in connection with Fig. 1. In an investigation contemporary with that of Koput, the electric dipole moment of CH<sub>3</sub>NCO was also precisely determined:  $\mu_a = 2.882(8)$  D (Kasten & Dreizler 1986).

Further progress in the investigation of the rotational spectrum of methyl isocyanate was achieved as part of this work. In a first stage a practically continuous 117 – 364 GHz of the molecule was recorded by means of the Fast Scanning Submillimeter Spectroscopic Technique (FASSST) developed at The Ohio State University (Petkie et al. 1997; Medvedev et al. 2004). The spectrum was recorded at room-temperature using a commercially available sample. Although the Koput (1986)

analysis was very successful in accounting for the consequences of the large amplitude motions on the rotational spectrum of this molecule, the deviation of the fit to 210 transitions up to  $J = 4 \leftarrow 3$  was 3 MHz, which was well in excess of the 0.05 MHz frequency measurement precision of his spectrometer. Furthermore, even a cursory inspection of the FASSST spectrum (see Fig. 1) revealed that it was devoid of easily discernible spectral patterns and that progress in its traditional interpretation would be difficult. We have, therefore, decided to pursue a pragmatic approach to the characterization of this spectrum based on the generic property of rotational spectra, in that evolution of the frequencies of rotational transitions of a given set of quantum numbers can be described by a smooth function in the  $J$  quantum number. It was eventually possible to identify over 220 such line sequences and to fit each sequence to within experimental accuracy with a linear rotor-type model using a power series expansion in  $J(J + 1)$ , as discussed in a preliminary report in 2010 (Kisiel et al. 2010). The separate line sequences were still without a confident  $K$ ,  $m$ , and  $v_b$  quantum number assignment. An initial attempt to transfer such assignments from the Koput work by linking sequences in the FASSST region with those below 40 GHz revealed many ambiguities, due to a still considerable region of missing experimental coverage of the rotational spectrum of CH<sub>3</sub>NCO.

For this reason, in a second stage of the laboratory part of the present work, the missing 40 – 117 GHz region of the spectrum was covered in Valladolid by using two complementary spectrometers. The 50 – 117 GHz segment of the spectrum was recorded with a harmonic generation spectrometer based on the multiplication of the synthesizer frequency of up to 20 GHz and employing source modulation detection (Daly et al. 2014). The  $J = 5 \leftarrow 4$  transition at 41 – 45 GHz was measured with a Stark modulation spectrometer (Daly et al. 2015) at a modulation voltage of 430 V. The sample was synthesized using the method described by Brändström et al. (1974) and in both spectrometers was kept at room temperature and a pressure of 20  $\mu$ bar. As a result of the combined effort from the participating laboratories we were able to achieve complete room temperature experimental coverage of the rotational spectrum of methyl isocyanate from the lowest  $J = 1 \leftarrow 0$  transition up to the  $J = 41 \leftarrow 40$  transition centred near 358 GHz. The analysis procedure first involved creating a single spectrum by combining all available experimental spectra. The intensities for the lines measured by Koput are not available so that the < 40 GHz spectral segment was simulated by assuming equal intensity transitions at the reported frequencies. Measurements on this spectrum were then performed with the AABS package for Assignment and Analysis of Broadband Spectra (Kisiel et al. 2005, 2012), which is freely available from the PROSPE website (Kisiel 2001,a). The fits and predictions were made with Pickett’s SPCAT/SPFIT program suite (Pickett 1991) and each line sequence required its own dedicated set of analysis files. In the case of explicit asymmetric rotor fits Watson’s  $A$ -reduced asymmetric rotor Hamiltonian (Watson 1977) was used. The Loomis-Wood type mode for displaying the rotational spectrum (as pioneered for rotational spectroscopy by Winnewisser et al. (1989) and built into the AABS package) was used for graphical assignment of transitions in specific line sequences. Some preliminary results were reported in the middle of last year (Kisiel et al., 2015) and Loomis-Wood plots for several sample transition sequences are reproduced in Fig. A.1. These plots allow the transfer of the Koput assignment to the higher frequency spectrum. We also consider the Koput assignment to be reliable since it was reached using variable voltage Stark modulation spectroscopy, which provides good discrimi-

nation between transitions with different values of  $K$  according to their different line profiles. Each of these identified line sequences is reproduced by a suitable  $J(J + 1)$  power series expansion for the rotational energies

$$E_{\text{rot}} = BJ(J + 1) - D_J J^2(J + 1)^2 + H_J J^3(J + 1)^3 + L_J J^4(J + 1)^4 + P_J J^5(J + 1)^5 + P_{12} J^6(J + 1)^6 + P_{14} J^7(J + 1)^7 + P_{16} J^8(J + 1)^8 + P_{18} J^9(J + 1)^9 \quad (\text{A.1})$$

where the length of the expansion and the magnitudes of the expansion parameters  $B$ ,  $D_J$ ,  $H_J$ , etc., are determined by the interactions and also by the asymmetry contributions affecting the energy levels in question. The required length of the expansion ranges from only three terms to being insufficient even if all nine terms in Eq. A.1 are used. In several rare cases two power expansions were needed to model a line sequence with a particularly complex  $J$  dependence, by splitting the sequence into two parts. The results of such fits for the key assigned transition sequences used in the present astrophysical identifications are listed in Table A.1. In labelling the sequences we conform, as closely as possible, to the notation of Koput (1986) in order to ensure traceability. There are only two differences where the original notation was ambiguous and was modified. In the case of the ground state,  $v_b = 0$ ,  $m = 0$ , for which asymmetric rotor notation would normally be more appropriate, we modified Koput’s notation to  $K = 1L$ ,  $1U$ , etc., to distinguish between lower and upper frequency sequences for the same value of  $K_a$ . Similarly, we used the notation  $m = 3L$  and  $3U$  in order to distinguish between those of the two nearly degenerate  $m = 3$  substates which give rise to lower and upper frequency rotational transition sequences.

The series fits and the Loomis-Wood displays were an invaluable aid to the analysis that allowed the identification of sequences of lines, extending up from the lowest  $J$  rotational transitions. It should be stated, however, that the transition frequencies for CH<sub>3</sub>NCO reported in the line lists below are actual experimental frequencies. The power expansion fits were used to interpolate between the measured lines only in several cases of transitions missing in the spectrum for technical reasons. It is anticipated that these expansions may have useful predictive properties outside the present data region, but only for those series for which the expansion containing a moderate number of expansion terms is sufficient.

#### Appendix A.1: Spectroscopic constants and the partition function

The line lists for astrophysical detection require not only reliable line frequencies, but also line intensities that ultimately have a bearing on the derived column densities. Calculation of line intensities is crucially dependent on the rotational partition function,  $Q_{\text{rot}}$ , and CH<sub>3</sub>NCO also poses a considerable inconvenience in this respect. For asymmetric rotor molecules with vibrational modes at relatively high frequencies the ground vibrational state rotational partition function can be usefully approximated with

$$Q_{\text{rot}} = 5.3311 \times 10^6 (T^3 / (ABC))^{1/2}, \quad (\text{A.2})$$

where  $A$ ,  $B$ , and  $C$  are the rotational constants for the molecule (in MHz) and  $T$  is the temperature (in K). Assumption of the rotational partition function for just the ground state

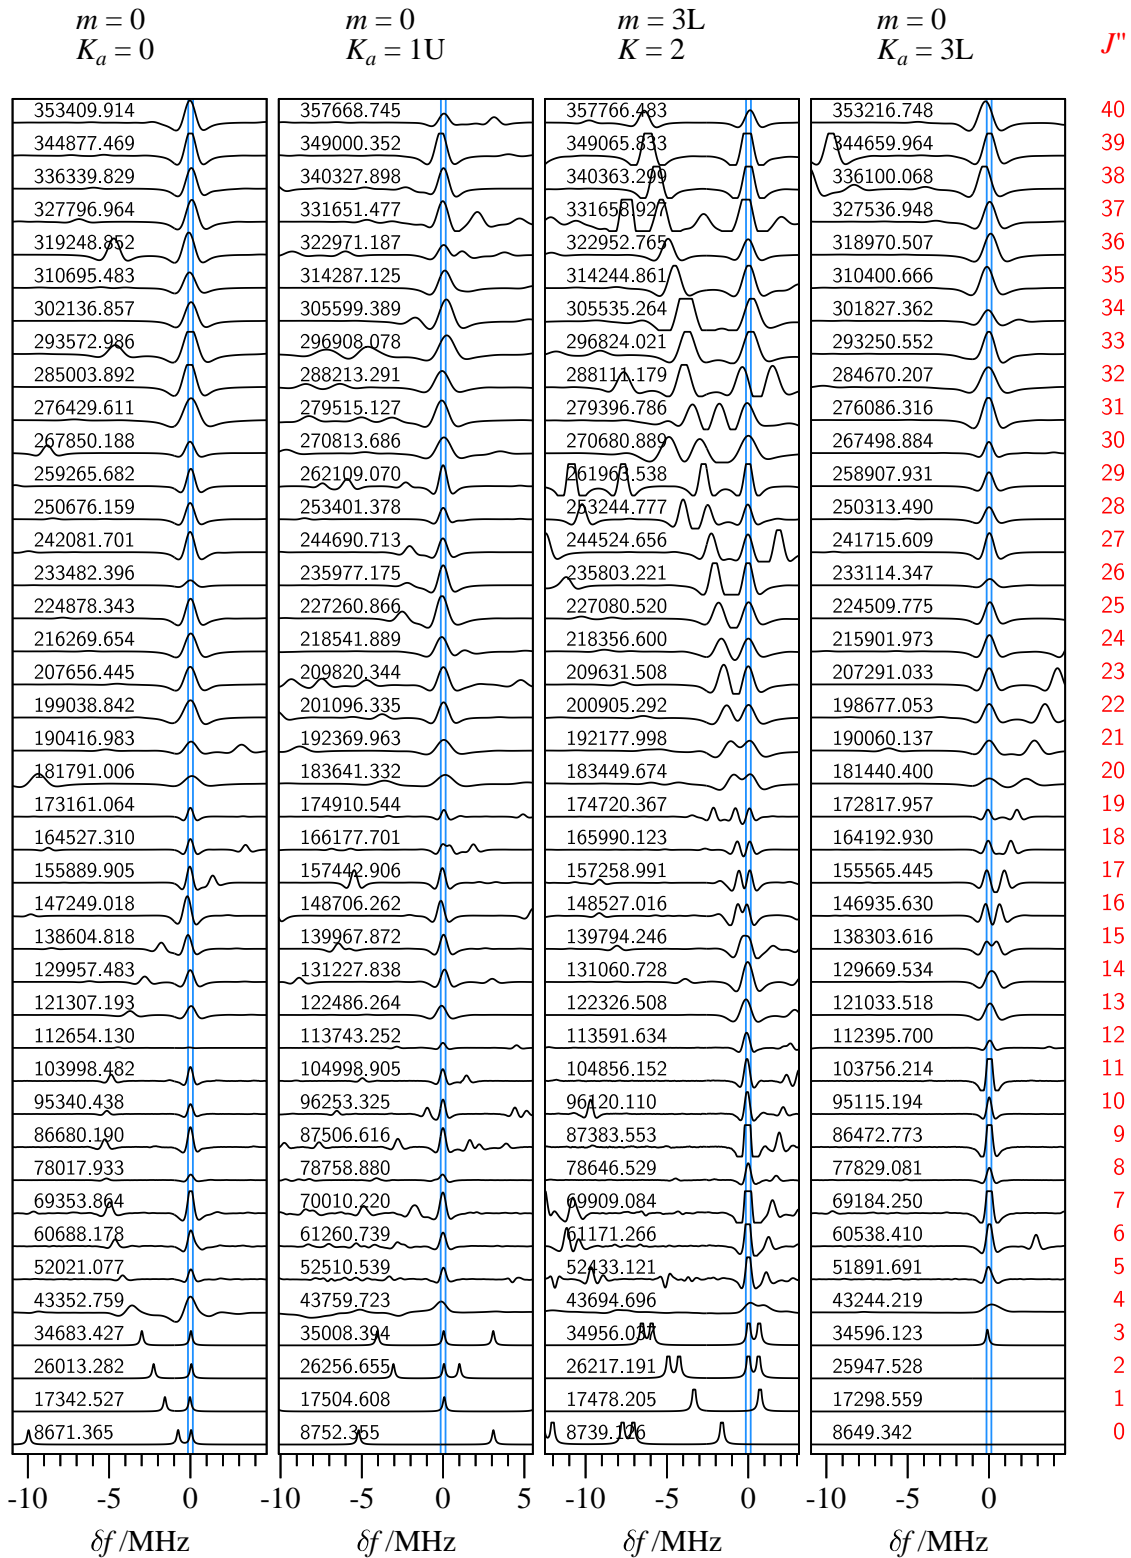

**Fig. A.1.** Sample Loomis-Wood type plots of the rotational spectrum of  $\text{CH}_3\text{NCO}$  for several assigned line sequences for  $v_b = 0$  where sections of the experimental spectrum are plotted around the indicated centre frequencies from the linear-type fits. The plots illustrate how the assignments reached with Stark spectroscopy at  $J'' \leq 3$  could be unambiguously transferred to the millimetre wave region. The blue lines mark the estimated frequency uncertainty.

**Table A.1.** The parameters of the linear rotor-type,  $J(J+1)$  power series fitted to the assigned line sequences.

| $K^a$                                                                                                                             | Name <sup>b</sup>       | $I_{\text{rel}}^c$ | $N_{\text{in}}^d$ | $N_{\text{rej}}^e$ | $s^f$ (MHz) | $B^g$ (MHz)     | $D_J$ (kHz)  | $H_J$ (Hz)    | $L_J$ (mHz)   | $P_J$ ( $\mu$ Hz) | $P_{12}$ (nHz) | $P_{14}$ (pHz) | $P_{16}$ (fHz) | $P_{18}$ (aHz) |
|-----------------------------------------------------------------------------------------------------------------------------------|-------------------------|--------------------|-------------------|--------------------|-------------|-----------------|--------------|---------------|---------------|-------------------|----------------|----------------|----------------|----------------|
| <b><math>v_b = 0, m = 0</math> (gs): <math>E_{\text{vib}} = 0 \text{ cm}^{-1}</math></b>                                          |                         |                    |                   |                    |             |                 |              |               |               |                   |                |                |                |                |
| 0                                                                                                                                 | V093:                   | 0.885              | 41                | 1                  | 0.046       | 4335.6996 (13)  | 8.4815 (43)  | 0.1971 (58)   | 0.0728 (33)   | -0.00909 (69)     |                |                |                |                |
| 1L                                                                                                                                | V126:                   | 0.842              | 38                | 2                  | 0.048       | 4297.6203 (10)  | 3.3744 (21)  | 0.1133 (16)   | -0.00393 (41) |                   |                |                |                |                |
| 1U                                                                                                                                | V131:                   | 0.819              | 38                | 2                  | 0.062       | 4376.1857 (14)  | 4.2752 (30)  | -0.0053 (24)  | 0.00245 (67)  |                   |                |                |                |                |
| 2L                                                                                                                                | V089:                   | 0.833              | 38                | 1                  | 0.055       | 4339.69609 (82) | 3.28715 (94) | 0.03891 (31)  |               |                   |                |                |                |                |
| 2U                                                                                                                                | V006:                   | 0.901              | 38                | 1                  | 0.052       | 4339.6811 (16)  | -2.8764 (56) | -0.1690 (77)  | -0.0676 (47)  | 0.0079 (10)       |                |                |                |                |
| 3L                                                                                                                                | V096:                   | 0.727              | 35                | 4                  | 0.063       | 4324.6816 (20)  | 5.1755 (65)  | -0.2787 (86)  | 0.1698 (50)   | -0.0156 (10)      |                |                |                |                |
| 3U                                                                                                                                | V097:                   | 0.726              | 35                | 4                  | 0.054       | 4324.6762 (18)  | 5.1686 (55)  | -0.1769 (74)  | 0.1479 (43)   | -0.01455 (89)     |                |                |                |                |
| <b><math>v_b = 0, m = 1</math> E: <math>E_{\text{vib}} = 8.4 \text{ cm}^{-1}</math></b>                                           |                         |                    |                   |                    |             |                 |              |               |               |                   |                |                |                |                |
| 0a                                                                                                                                | V107:                   | 0.808              | 22                | 0                  | 0.051       | 4357.5774 (71)  | 132.34 (14)  | 86.4 (14)     | 226.1 (67)    | -665. (17)        | 719. (21)      | -298. (11)     |                |                |
| 0b                                                                                                                                | X107:                   | 0.808              | 20                | 0                  | 0.056       | 4348.7 (10)     | 116.2 (37)   | 146.2 (74)    | -125.4 (87)   | 71.4 (65)         | -25.9 (29)     | 5.39 (74)      | -0.493 (81)    |                |
| -1                                                                                                                                | V101:                   | 0.836              | 39                | 1                  | 0.050       | 4282.7615 (32)  | -3.118 (26)  | 9.39 (10)     | -10.67 (19)   | 6.64 (21)         | -2.59 (13)     | 0.590 (44)     | -0.0593 (59)   |                |
| 1                                                                                                                                 | V098:                   | 0.846              | 36                | 5                  | 0.048       | 4284.5720 (42)  | -35.940 (44) | -45.38 (21)   | 49.98 (57)    | -45.27 (87)       | 29.62 (81)     | -12.71 (44)    | 3.16 (12)      | -0.342 (15)    |
| -2                                                                                                                                | not assigned            |                    |                   |                    |             |                 |              |               |               |                   |                |                |                |                |
| 2                                                                                                                                 | V100:                   | 0.660              | 31                | 2                  | 0.042       | 4350.3415 (23)  | -2.325 (15)  | -0.065 (46)   | -0.290 (64)   | 0.284 (43)        | -0.109 (11)    |                |                |                |
| -3                                                                                                                                | V005:                   | 0.800              | 36                | 2                  | 0.058       | 4343.3487 (25)  | 0.096 (11)   | 0.288 (25)    | -0.381 (25)   | 0.202 (12)        | -0.0848 (22)   |                |                |                |
| 3                                                                                                                                 | V012:                   | 0.642              | 34                | 3                  | 0.049       | 4356.1489 (11)  | 1.6845 (24)  | -0.0204 (19)  | 0.00189 (52)  |                   |                |                |                |                |
| <b><math>v_b = 0, m = -2</math> E: <math>E_{\text{vib}} = 36.8 \text{ cm}^{-1}</math></b>                                         |                         |                    |                   |                    |             |                 |              |               |               |                   |                |                |                |                |
| 0                                                                                                                                 | V119:                   | 0.774              | 36                | 1                  | 0.050       | 4356.2099 (29)  | 2.431 (15)   | 0.837 (33)    | -2.676 (29)   |                   |                |                |                |                |
| -1                                                                                                                                | V008:                   | 0.708              | 38                | 2                  | 0.062       | 4353.2529 (11)  | 1.0831 (14)  | 0.0           | 0.00928 (84)  | -0.00378 (31)     |                |                |                |                |
| 1                                                                                                                                 | V180:                   | 0.807              | 40                | 0                  | 0.188       | 4350.771 (14)   | -40.79 (16)  | -39.36 (81)   | -24.5 (22)    | 74.5 (34)         | -69.5 (32)     | 34.7 (17)      | -9.27 (54)     | 1.045 (69)     |
| -2                                                                                                                                | not assigned            |                    |                   |                    |             |                 |              |               |               |                   |                |                |                |                |
| 2                                                                                                                                 | V100:                   | 0.805              | 39                | 0                  | 0.084       | 4276.5950 (66)  | -51.195 (68) | -64.24 (33)   | 63.79 (84)    | -50.5 (12)        | 29.3 (11)      | -11.35 (59)    | 2.60 (17)      | -0.262 (20)    |
| -3                                                                                                                                | V024:                   | 0.473              | 35                | 3                  | 0.055       | 4366.9265 (12)  | 1.9129 (27)  | -0.0098 (22)  | 0.00672 (61)  |                   |                |                |                |                |
| 3a                                                                                                                                | V106:                   | 0.523              | 21                | 0                  | 0.043       | 4373.6038 (50)  | 110.306 (69) | 93.71 (41)    | -32.2 (12)    | -11.7 (16)        | 10.81 (88)     |                |                |                |
| 3b                                                                                                                                | X106:                   | 0.884              | 18                | 0                  | 0.052       | 4370.20 (59)    | 103.8 (16)   | 95.6 (24)     | -55.9 (22)    | 20.9 (11)         | -4.49 (32)     | 0.438 (38)     |                |                |
| <b><math>v_b = 0, m = 3L</math> (<math>K = 0, J = 0, 1 = A_1, A_2</math>): <math>E_{\text{vib}} = 80.3 \text{ cm}^{-1}</math></b> |                         |                    |                   |                    |             |                 |              |               |               |                   |                |                |                |                |
| 0                                                                                                                                 | V017:                   | 0.556              | 38                | 2                  | 0.061       | 4361.0342 (19)  | 0.6664 (66)  | 0.0255 (94)   | 0.0843 (57)   | -0.0269 (12)      |                |                |                |                |
| -1                                                                                                                                | V137:                   | 0.654              | 37                | 2                  | 0.093       | 4376.0833 (78)  | -11.011 (83) | 3.34 (41)     | -25.5 (11)    | 21.8 (17)         | -17.3 (16)     | 11.56 (91)     | -4.15 (27)     | 0.576 (34)     |
| 1                                                                                                                                 | V082:                   | 0.485              | 39                | 0                  | 0.070       | 4362.15134 (58) | 1.68176 (26) |               |               |                   |                |                |                |                |
| -2                                                                                                                                | not assigned            |                    |                   |                    |             |                 |              |               |               |                   |                |                |                |                |
| 2                                                                                                                                 | V030:                   | 0.399              | 35                | 3                  | 0.067       | 4369.5669 (10)  | 1.9458 (12)  | -0.00228 (41) |               |                   |                |                |                |                |
| 3                                                                                                                                 | V040:                   | 0.634              | 33                | 2                  | 0.064       | 4378.65685 (60) | 2.06406 (30) |               |               |                   |                |                |                |                |
| <b><math>v_b = 0, m = 3U</math> (<math>K = 0, J = 1, 0 = A_2, A_1</math>): <math>E_{\text{vib}} = 79.7 \text{ cm}^{-1}</math></b> |                         |                    |                   |                    |             |                 |              |               |               |                   |                |                |                |                |
| 0                                                                                                                                 | V018:                   | 0.540              | 39                | 2                  | 0.046       | 4361.4499 (14)  | 0.5247 (49)  | 0.0221 (69)   | 0.0949 (42)   | -0.02898 (93)     |                |                |                |                |
| 1                                                                                                                                 | V020:                   | 0.491              | 36                | 3                  | 0.044       | 4363.55034 (68) | 1.72074 (80) | -0.00110 (27) |               |                   |                |                |                |                |
| -1                                                                                                                                | not assigned            |                    |                   |                    |             |                 |              |               |               |                   |                |                |                |                |
| 2                                                                                                                                 | V029:                   | 0.424              | 34                | 4                  | 0.057       | 4369.57115 (94) | 1.9779 (10)  | 0.00072 (36)  |               |                   |                |                |                |                |
| -2                                                                                                                                | not assigned            |                    |                   |                    |             |                 |              |               |               |                   |                |                |                |                |
| 3                                                                                                                                 | very strongly perturbed |                    |                   |                    |             |                 |              |               |               |                   |                |                |                |                |
| <b><math>v_b = 0, m = 4</math> E: <math>E_{\text{vib}} = 140.6 \text{ cm}^{-1}</math></b>                                         |                         |                    |                   |                    |             |                 |              |               |               |                   |                |                |                |                |
| 0                                                                                                                                 | V025:                   | 0.416              | 37                | 3                  | 0.052       | 4368.7341 (11)  | 1.5662 (25)  | 0.0039 (21)   | 0.00218 (57)  |                   |                |                |                |                |
| <b><math>v_b = 0, m = -5</math> E: <math>E_{\text{vib}} = 217.5 \text{ cm}^{-1}</math></b>                                        |                         |                    |                   |                    |             |                 |              |               |               |                   |                |                |                |                |
| 0                                                                                                                                 | V142:                   | 0.297              | 38                | 1                  | 0.049       | 4377.7029 (11)  | 1.8930 (23)  | -0.0136 (19)  | 0.00256 (51)  |                   |                |                |                |                |
| <b><math>v_b = 1, m = 0</math> : <math>E_{\text{vib}} = 182.2 \text{ cm}^{-1}</math></b>                                          |                         |                    |                   |                    |             |                 |              |               |               |                   |                |                |                |                |
| 0                                                                                                                                 | V094:                   | 0.391              | 41                | 0                  | 0.050       | 4335.3010 (15)  | 7.8017 (47)  | 0.2011 (63)   | 0.0443 (37)   | -0.00561 (76)     |                |                |                |                |
| 1L                                                                                                                                | V127:                   | 0.373              | 38                | 2                  | 0.052       | 4297.1113 (11)  | 3.2544 (22)  | 0.0971 (17)   | -0.00294 (44) |                   |                |                |                |                |
| 1U                                                                                                                                | V132:                   | 0.365              | 36                | 3                  | 0.048       | 4377.6225 (11)  | 4.2356 (24)  | 0.0116 (19)   | 0.00223 (53)  |                   |                |                |                |                |

**Notes.**

<sup>a</sup> The value of the  $K_a$  or  $K$  quantum number following, where possible, the notation of Koput (1986) and described further in the text following Eq.A.1.

<sup>b</sup> The identifier of the line sequence, identifiers Vnnn and Xnnn for the same "nnn" denote a two part sequence (Vnnn lower, Xnnn higher frequency part).

<sup>c</sup> Intensity of the sequence relative to the strongest sequence in the spectrum.

<sup>d</sup> The number of lines in the linear fit.

<sup>e</sup> The number of confidently assigned lines that were perturbed and were rejected from the fit.

<sup>f</sup> The standard deviation of the linear fit.

<sup>g</sup> The values of the parameters required in the linear fit.

of the molecule as the total partition function and neglect of population in excited vibrational states is normally associated with a relatively small underestimate, especially for low-temperature environments. For CH<sub>3</sub>NCO this is not the case owing to the plethora of low-lying internal rotation substates, and it is nec-

essary to consider the vibration-rotation partition function,  $Q_{\text{vr}}$ , explicitly. Furthermore, the difficulties in fitting more than a relatively small subset of measured transitions affect even the determination of the rotational constants. We summarize the situation in Table A.2, which demonstrates that even with a consider-

able reduction in the range of  $K_a$  values for the fitted transitions, the fit is less satisfactory than is usually the case with rotational spectra. Inclusion of measured transitions for all measured values of  $J$  requires the use of a rather large number of centrifugal distortion constants and values of some of these constants are also of considerable magnitude. This points to the very effective nature of such constants and to the considerable vibration-rotation interactions in the  $\text{CH}_3\text{NCO}$  molecule. The deviation of fit is also somewhat greater than the experimental accuracy. With these reservations in mind, we find rather good agreement between rotational constants resulting from the two fits based on very different subsets of the current data (the two central columns of Table A.2). We therefore use the combined fit of the indicated limited data (the rightmost column of Table A.2) as the source of rotational constants for evaluation of the partition function. The complete results of that fit are reported in Table A.3.

The second issue affecting the evaluation of the partition function is the summation over the energy levels. We used the SPCAT program to carry out this summation numerically, and the results are summarized in Table A.4. The nearly free internal rotor levels  $m = 1, 2, 4, 5$  are closer in character to the symmetric top case so that we used rotational constants  $A$  and  $(B + C)/2$  in the partition function calculation, while for the remaining sub-levels ( $m = 0$  and  $m$  being a multiple of 3) we used separate values of  $A$ ,  $B$ , and  $C$  (all from the final column of Table A.2). It can be seen in Table A.4 (a) that at room-temperature and at a specimen astrophysical temperature of 120 K the partition function  $Q_{\text{vr}}$  increases significantly on addition of successive vibrational substates. It is only upon reaching vibrational energy of  $400 \text{ cm}^{-1}$  above the ground state that a moderate saturation of the value of  $Q_{\text{vr}}$  becomes apparent. This corresponds to the consideration of energy levels in the ground state and the 17 vibrational substates immediately above it.

Table A.4(b) further illustrates some technical aspects associated with the evaluation of  $Q_{\text{vr}}$  such as the necessity of using sufficiently broad limits on the values of the  $J$  and  $K$  quantum numbers. It turns out that the large values of centrifugal distortion constants from the effective fit for  $K \leq 2$  lead to unphysical compression of energy levels at the highest values of  $J$  and  $K$ , as highlighted by specific diagnostics from the SPCAT program. At the same time, the details of the summation have little effect on the estimate of the low temperature partition function. For this reason we settle on the “recommended” conditions, which pass the test that the value from the numerical summation for just the ground state is close to that from the analytical formula in Eq. A.2.

The final result of these considerations is that at room-temperature it is necessary to use a partition function value that is almost 8 times greater than that for just the ground state, while at 120 K this ratio is closer to 4. It is clear that a reliable estimate of the partition function to use for the calculation of transition intensities will have a direct bearing on the derived astrophysical abundances of  $\text{CH}_3\text{NCO}$ .

#### Appendix A.2: Line lists

The final results of the analysis of the laboratory rotational spectrum of  $\text{CH}_3\text{NCO}$  for use in astrophysical applications are presented in Tables A.5 and A.6. The experimental frequencies for 27 rotational transition sequences with the lowest vibrational energy are listed in Table A.5. Five more specimen transition sequences corresponding to higher vibrational energies and presenting a challenge to confident astrophysical detection are also

included. This line list is also given in Table A.6 in the standard format of the JPL catalog (Pickett et al. 1998). Table A.6 contains line intensities and lower state energies so that it can be easily converted to a different temperature. Table A.6 constitutes the main tool for astrophysical detection and characterization of  $\text{CH}_3\text{NCO}$ , and we summarize the key parameters used in its evaluation:  $\mu = \mu_a = 2.882 \text{ D}$ ,  $T = 300 \text{ K}$ , and  $Q_{\text{vr}} = 138369$  calculated by summing over rotational levels limited by  $K < 11$  and  $J < 100$  for all vibrational states up to  $402.5 \text{ cm}^{-1}$  above the ground state.

We have already commented above on the key discrepancies between the experimental frequencies reported in Halfen et al. (2015) and those in this work as summarized in Table A.7. We further note that if we replace our frequencies in the fit for the ground state reported in Table A.3 by the three problematic  $m = 0$  lines at 60160.932, 68753.890, and 70009.179 MHz (see Table A.7), then those lines are incompatible with this fit at obs.-calc. frequencies of near -1.1 MHz. Our frequencies for these transitions have obs.-calc. values of less than 0.03 MHz, in a fit encompassing 201 pure rotational transition frequencies. In fact, the discrepancy of 1 MHz from a line sequence comprising around 40 lines and consisting of both Koput (1986) and our mm-wave lines would be immediately visible. This is clearly apparent in Fig. A.1 (second column from the left), where the 70010.208 MHz line is in good agreement with the sequence defined by a low order  $J(J + 1)$ -type fit, whereas a frequency of 70009.179 MHz is clearly incompatible.

Finally, we note that the quantization used in Halfen et al. (2015) for the  $m = 0$ ,  $K_a = 1$  transitions deviates from standard practice. While the quantization for the  $m > 0$  lines is somewhat arbitrary and largely dependent on the fitting program, the quantization for the ground state is well established. In the case when the splitting between the two  $a$ -dipole  $\Delta J = 1$ ,  $K_a = 1$  transitions for a given value of  $J''$  is dominated by the asymmetry term in the rotational Hamiltonian (as is the case for  $\text{CH}_3\text{NCO}$ ) it is the  $K_a = 1$  transition with the *higher* value of  $K_c$  that is at *lower* frequency, and the one with *lower* value of  $K_c$  that is at *higher* frequency. This quantization leads to the moderately successful effective fit for the ground ( $m = 0$ ) state reported by us in Table A.3. On the other hand, in Halfen et al. (2015) the  $K_c$  quantization for  $m=0$ ,  $K_a=1$  transitions is systematically reversed.

#### Appendix A.3: Nuclear quadrupole hyperfine splitting

It should be noted that the lowest- $J$  rotational transitions of  $\text{CH}_3\text{NCO}$  are subject to nuclear quadrupole hyperfine splitting, and that the line lists discussed above provide in such cases only the average, hyperfine-free frequencies. The hyperfine splitting arising from the presence of the  $^{14}\text{N}$  nucleus in the  $\text{CH}_3\text{NCO}$  molecule was studied in previous works (Kasten & Dreizler 1986; Curl et al. 1963; Lett et al. 1967). We have now, for the first time, observed such lines at the very low temperature of supersonic expansion using two spectroscopic techniques.  $\text{CH}_3\text{NCO}$  was first investigated by broadband chirped-pulse Fourier transform microwave (CP-FTMW) spectroscopy (Brown et al. 2008) in two different frequency ranges: 6 – 18 and 25 – 26 GHz (Mata et al. 2012). A gas mixture containing 0.3% of  $\text{CH}_3\text{NCO}$  in neon at the backing pressure of 3 bar was used for the pulsed jet expansion. These scans allowed explicit confirmation of the assignment of the ground state ( $v_b = 0$ ,  $m = 0$ ) lines since these lines (and some of the lowest  $v_b = 0$ ,  $m = 1$  substate lines) are the only lines expected to be visible at these conditions. In order to resolve the nuclear quadrupole hyperfine

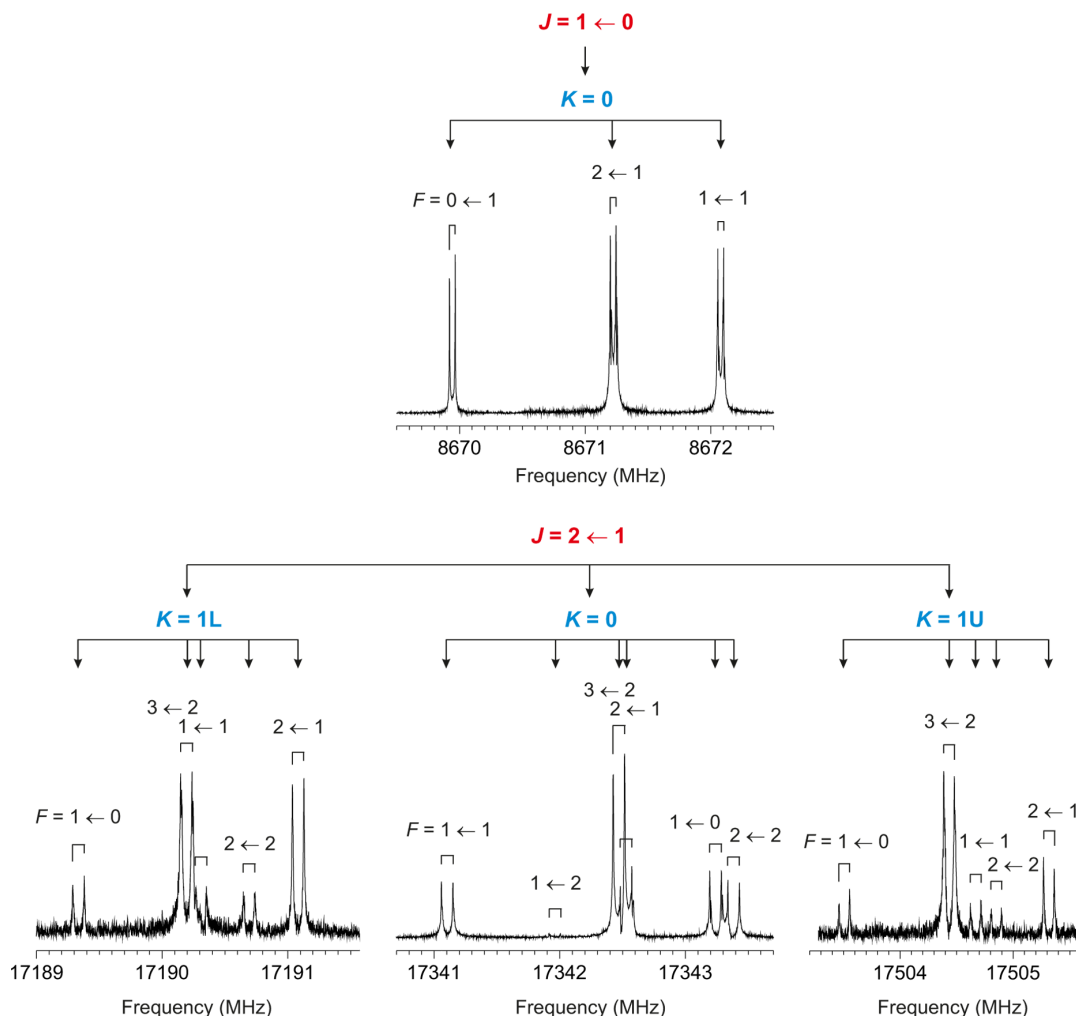

**Fig. A.2.** Splitting patterns in the lowest- $J$  rotational transitions in the ground state ( $v_b = 0, m = 0$ ) of  $\text{CH}_3\text{NCO}$ . The splitting is due to the interaction of the nuclear quadrupole of the  $^{14}\text{N}$  nucleus with molecular rotation and is characterized by the total angular momentum quantum number  $F$ . Each component is doubled by the Doppler doubling, which is an instrumental effect specific to the FP-FTMW spectrometer. The splitting is completely resolved at the supersonic expansion conditions ( $T_{\text{rot}} = 2$  K) of the FP-FTMW spectrometer. Nevertheless, the magnitude, and thus the relevance of the splitting, decreases rapidly with increasing  $J$ .

structure, further measurements were performed by supersonic expansion, Fabry-Perot cavity, and Fourier transform microwave (FP-FTMW) spectroscopy (Grabow et al. 1996) using two different configurations covering the frequency range from 4 to 18 GHz (Alonso et al. 1997; Bermúdez et al. 2014). Fig. A.2 shows the experimentally recorded hyperfine patterns for the first two lowest- $J$  transitions of  $\text{CH}_3\text{NCO}$  and it is clear that at sub-MHz resolution consideration of such splitting is important. Table A.8 lists hyperfine component frequencies for all  $K \leq 2$  rotational transitions up to 80 GHz. This prediction has an estimated accuracy of around 5 kHz and was made by using the rightmost set of spectroscopic constants from Table A.2. It is apparent that the central  $\Delta F = +1$  components quickly coalesce, while the outer  $\Delta F = 0$  components rapidly lose intensity.

**Table A.2.** Spectroscopic constants determined for the ground state of CH<sub>3</sub>NCO ( $v_b = 0, m = 0$ ).

| Constant                      | Koput (1986) | Hyperfine resolved<br>$J \leq 2, K_a \leq 1$ | Hyperfine unresolved<br>$J \leq 42, K_a \leq 2$ | All data      |
|-------------------------------|--------------|----------------------------------------------|-------------------------------------------------|---------------|
| $A^a$ (MHz)                   | 73849.2      | 128356.(7623) <sup>b</sup>                   | 128435.(19)                                     | 128402.(13)   |
| $B$ (MHz)                     | 4392.22      | 4414.2478(12)                                | 4414.6182(93)                                   | 4414.6287(75) |
| $C$ (MHz)                     | 4256.66      | 4257.1309(12)                                | 4256.7490(85)                                   | 4256.7452(71) |
| $\Delta_J$ (kHz)              |              | 2.45(40)                                     | 2.3209(11)                                      | 2.32319(98)   |
| $\Delta_{JK}$ (kHz)           |              | -1202.3(23)                                  | -1274.0(13)                                     | -1271.46(73)  |
| $\delta_J$ (kHz)              |              |                                              | 0.4042(14)                                      | 0.4038(14)    |
| $\delta_K$ (kHz)              |              |                                              | 183.1(43)                                       | 187.4(35)     |
| $\Phi_J$ (Hz)                 |              |                                              | -0.00191(47)                                    | -0.00142(45)  |
| $\Phi_{JK}$ (Hz)              |              |                                              | -5.39(24)                                       | -5.64(18)     |
| $\Phi_{KJ}$ (Hz)              |              |                                              | -68478.(285)                                    | -67991.(167)  |
| $\phi_{JK}$ (Hz)              |              |                                              | -47.6(14)                                       | -47.7(14)     |
| $\chi_{aa}$ (MHz)             | 2.8358(75)   | 2.8461(18)                                   |                                                 | 2.8441(49)    |
| $\chi_{bb}$ (MHz)             | -1.288(21)   | -1.2981(30)                                  |                                                 | -1.2962(67)   |
| $\chi_{cc}$ (MHz)             | -1.548(21)   | -1.5481(30)                                  |                                                 | -1.5478(67)   |
| $N_{\text{lines}}^c$          | 13           | 32                                           | 201                                             | 233           |
| $\sigma_{\text{fit}}^d$ (kHz) | 6            | 3                                            | 94.6                                            | 91.2          |
| $\sigma_{\text{rms}}^e$       | 0.842        | 0.674                                        | 1.89                                            | 1.87          |

**Notes.**

<sup>(a)</sup> $A$ ,  $B$ , and  $C$  are rotational constants;  $\Delta_J, \dots, \phi_{JK}$  are centrifugal distortion constants in Watson's  $A$ -reduced asymmetric rotor Hamiltonian; and  $\chi_{aa}, \chi_{bb}, \chi_{cc}$  are nuclear quadrupole hyperfine splitting constants for the <sup>14</sup>N nucleus.

<sup>(b)</sup>Errors in parentheses are standard errors in units of the last digit.

<sup>(c)</sup>The number of fitted lines.

<sup>(d)</sup>Standard deviation of the fit.

<sup>(e)</sup>Unitless (weighted) deviation of the fit.

Table A.3. Results of fitting the spectroscopic constants of Table A.2 for CH<sub>3</sub>NCO ground state ( $m=0$ ).

| J' Ka' Kc' F'                                                                                 | J'' Ka'' Kc'' F'' | obs.<br>(MHz) | o.-c.<br>(MHz) | error<br>(MHz) | J' Ka' Kc' F' | J'' Ka'' Kc'' F'' | obs.<br>(MHz) | o.-c.<br>(MHz) | error<br>(MHz) |
|-----------------------------------------------------------------------------------------------|-------------------|---------------|----------------|----------------|---------------|-------------------|---------------|----------------|----------------|
| Valladolid supersonic expansion, cavity FTMW<br>(small splitting in some components averaged) |                   |               |                |                | 18 0 18       | 17 0 17           | 155889.8670   | -0.0382        | 0.050          |
|                                                                                               |                   |               |                |                | 19 0 19       | 18 0 18           | 164527.3080   | -0.0074        | 0.050          |
|                                                                                               |                   |               |                |                | 20 0 20       | 19 0 19           | 173161.0610   | -0.0158        | 0.050          |
| 1 0 1 0                                                                                       | 0 0 0 1           | 8669.9439     | 0.0013         | 0.003          | 21 0 21       | 20 0 20           | 181791.1040   | 0.0759         | 0.050          |
| 1 0 1 2                                                                                       | 0 0 0 1           | 8671.2271     | 0.0047         | 0.005          | 22 0 22       | 21 0 21           | 190417.0240   | 0.0104         | 0.050          |
| 1 0 1 1                                                                                       | 0 0 0 1           | 8672.0809     | 0.0053         | 0.005          | 23 0 23       | 22 0 22           | 199038.8460   | -0.0381        | 0.050          |
|                                                                                               |                   |               |                |                | 24 0 24       | 23 0 23           | 207656.4340   | -0.0633        | 0.050          |
| 2 0 2 1                                                                                       | 1 0 1 1           | 17341.1048    | 0.0012         | 0.003          | 25 0 25       | 24 0 24           | 216269.6740   | -0.0442        | 0.050          |
| 2 0 2 1                                                                                       | 1 0 1 2           | 17341.9591    | 0.0023         | 0.003          | 26 0 26       | 25 0 25           | 224878.3540   | -0.0656        | 0.050          |
| 2 0 2 3                                                                                       | 1 0 1 2           | 17342.4705    | 0.0059         | 0.003          | 27 0 27       | 26 0 26           | 233482.3920   | -0.0910        | 0.050          |
| 2 0 2 2                                                                                       | 1 0 1 1           | 17342.5315    | 0.0059         | 0.005          | 28 0 28       | 27 0 27           | 242081.6800   | -0.1184        | 0.050          |
| 2 0 2 1                                                                                       | 1 0 1 0           | 17343.2442    | 0.0076         | 0.005          | 29 0 29       | 28 0 28           | 250676.1400   | -0.1257        | 0.050          |
| 2 0 2 2                                                                                       | 1 0 1 2           | 17343.3848    | 0.0059         | 0.003          | 30 0 30       | 29 0 29           | 259265.7080   | -0.0864        | 0.050          |
|                                                                                               |                   |               |                |                | 31 0 31       | 30 0 30           | 267850.1630   | -0.1414        | 0.050          |
| 2 1 2 1                                                                                       | 1 1 1 0           | 17189.3349    | 0.0021         | 0.003          | 32 0 32       | 31 0 31           | 276429.6520   | -0.0742        | 0.050          |
| 2 1 2 3                                                                                       | 1 1 1 2           | 17190.1971    | 0.0046         | 0.005          | 33 0 33       | 32 0 32           | 285003.8410   | -0.1606        | 0.050          |
| 2 1 2 1                                                                                       | 1 1 1 1           | 17190.3077    | 0.0027         | 0.003          | 34 0 34       | 33 0 33           | 293572.9900   | -0.0933        | 0.050          |
| 2 1 2 2                                                                                       | 1 1 1 2           | 17190.6905    | 0.0005         | 0.003          | 35 0 35       | 34 0 34           | 302136.8980   | -0.0380        | 0.050          |
| 2 1 2 2                                                                                       | 1 1 1 1           | 17191.0845    | 0.0056         | 0.003          | 36 0 36       | 35 0 35           | 310695.4270   | -0.1085        | 0.050          |
|                                                                                               |                   |               |                |                | 37 0 37       | 36 0 36           | 319248.7530   | -0.1168        | 0.050          |
| 2 1 1 1                                                                                       | 1 1 0 0           | 17503.5055    | -0.0029        | 0.003          | 38 0 38       | 37 0 37           | 327797.0500   | 0.1116         | 0.050          |
| 2 1 1 3                                                                                       | 1 1 0 2           | 17504.4327    | -0.0037        | 0.003          | 39 0 39       | 38 0 38           | 336339.8860   | 0.1341         | 0.050          |
| 2 1 1 1                                                                                       | 1 1 0 1           | 17504.6671    | -0.0022        | 0.003          | 40 0 40       | 39 0 39           | 344877.4680   | 0.1351         | 0.050          |
| 2 1 1 2                                                                                       | 1 1 0 2           | 17504.8506    | -0.0025        | 0.003          | 41 0 41       | 40 0 40           | 353409.8830   | 0.1685         | 0.050          |
| 2 1 1 2                                                                                       | 1 1 0 1           | 17505.3161    | -0.0013        | 0.003          | 42 0 42       | 41 0 41           | 361937.2030   | 0.2623         | 0.050          |
| Kasten + Dreizler                                                                             |                   |               |                |                | 2 1 2         | 1 1 1             | 17190.6700    | 0.3022         | 0.050          |
|                                                                                               |                   |               |                |                | 3 1 3         | 2 1 2             | 25785.4100    | 0.0606         | 0.050          |
| 1 0 1 0                                                                                       | 0 0 0 1           | 8669.9540     | 0.0114         | 0.005          | 4 1 4         | 3 1 3             | 34380.1400    | 0.0516         | 0.050          |
| 1 0 1 2                                                                                       | 0 0 0 1           | 8671.2240     | 0.0016         | 0.005          | 5 1 5         | 4 1 4             | 42974.4300    | -0.0743        | 0.050          |
| 1 0 1 1                                                                                       | 0 0 0 1           | 8672.0790     | 0.0033         | 0.005          | 6 1 6         | 5 1 5             | 51568.5290    | 0.0117         | 0.050          |
|                                                                                               |                   |               |                |                | 7 1 7         | 6 1 6             | 60162.0760    | 0.0288         | 0.050          |
| 2 0 2 3                                                                                       | 1 0 1 2           | 17342.4670    | 0.0023         | 0.005          | 8 1 8         | 7 1 7             | 68755.0250    | 0.0099         | 0.050          |
| 2 0 2 2                                                                                       | 1 0 1 1           | 17342.5360    | 0.0104         | 0.005          | 9 1 9         | 8 1 8             | 77347.4250    | 0.0828         | 0.050          |
| 2 0 2 1                                                                                       | 1 0 1 0           | 17343.2340    | -0.0025        | 0.005          | 10 1 10       | 9 1 9             | 85938.9620    | 0.0115         | 0.050          |
| 2 0 2 2                                                                                       | 1 0 1 2           | 17343.3790    | 0.0001         | 0.005          | 11 1 11       | 10 1 10           | 94529.7610    | -0.0016        | 0.050          |
|                                                                                               |                   |               |                |                | 12 1 12       | 11 1 11           | 103119.7030   | 0.0008         | 0.050          |
| 2 1 2 1                                                                                       | 1 1 1 0           | 17189.3380    | 0.0052         | 0.005          | 13 1 13       | 12 1 12           | 111708.7070   | 0.0135         | 0.050          |
| 2 1 2 3                                                                                       | 1 1 1 2           | 17190.1970    | 0.0046         | 0.005          | 14 1 14       | 13 1 13           | 120296.6300   | -0.0318        | 0.050          |
| 2 1 2 2                                                                                       | 1 1 1 1           | 17191.0820    | 0.0031         | 0.005          | 15 1 15       | 14 1 14           | 128883.6440   | 0.1105         | 0.050          |
|                                                                                               |                   |               |                |                | 16 1 16       | 15 1 15           | 137469.2870   | 0.0511         | 0.050          |
| 2 1 1 1                                                                                       | 1 1 0 0           | 17503.5090    | 0.0005         | 0.005          | 17 1 17       | 16 1 16           | 146053.5740   | -0.1234        | 0.050          |
| 2 1 1 3                                                                                       | 1 1 0 2           | 17504.4390    | 0.0026         | 0.005          | 18 1 18       | 17 1 17           | 154636.8670   | 0.0190         | 0.050          |
| 2 1 1 2                                                                                       | 1 1 0 1           | 17505.3220    | 0.0045         | 0.005          | 19 1 19       | 18 1 18           | 163218.6020   | -0.0162        | 0.050          |
|                                                                                               |                   |               |                |                | 20 1 20       | 19 1 19           | 171798.9900   | 0.0492         | 0.050          |
| Hyperfine-free lines: Koput + MMW Valladolid + FASSST                                         |                   |               |                |                | 21 1 21       | 20 1 20           | 180377.7680   | 0.0191         | 0.050          |
|                                                                                               |                   |               |                |                | 22 1 22       | 21 1 21           | 188955.1000   | 0.1222         | 0.050          |
| 1 0 1                                                                                         | 0 0 0             | 8671.4100     | 0.0454         | 0.050          | 23 1 23       | 22 1 22           | 197530.5550   | -0.0088        | 0.050          |
| 2 0 2                                                                                         | 1 0 1             | 17342.5000    | -0.0255        | 0.050          | 24 1 24       | 23 1 23           | 206104.4470   | 0.0019         | 0.050          |
| 3 0 3                                                                                         | 2 0 2             | 26013.3400    | 0.0604         | 0.050          | 25 1 25       | 24 1 24           | 214676.5300   | -0.0308        | 0.050          |
| 4 0 4                                                                                         | 3 0 3             | 34683.4600    | 0.0365         | 0.050          | 26 1 26       | 25 1 25           | 223246.8260   | -0.0262        | 0.050          |
| 5 0 5                                                                                         | 4 0 4             | 43352.7630    | 0.0083         | 0.050          | 27 1 27       | 26 1 26           | 231815.2500   | -0.0118        | 0.050          |
| 6 0 6                                                                                         | 5 0 5             | 52021.1060    | 0.0350         | 0.050          | 28 1 28       | 27 1 27           | 240381.6640   | -0.0699        | 0.050          |
| 7 0 7                                                                                         | 6 0 6             | 60688.2100    | 0.0387         | 0.050          | 29 1 29       | 28 1 28           | 248946.1500   | -0.0642        | 0.050          |
| 8 0 8                                                                                         | 7 0 7             | 69353.8800    | 0.0247         | 0.050          | 30 1 30       | 29 1 29           | 257508.6010   | -0.0494        | 0.050          |
| 9 0 9                                                                                         | 8 0 8             | 78017.9530    | 0.0292         | 0.050          | 31 1 31       | 30 1 30           | 266068.9260   | -0.0654        | 0.050          |
| 10 0 10                                                                                       | 9 0 9             | 86680.1900    | 0.0106         | 0.050          | 32 1 32       | 31 1 31           | 274627.1410   | -0.0472        | 0.050          |
| 11 0 11                                                                                       | 10 0 10           | 95340.4430    | 0.0172         | 0.050          | 33 1 33       | 32 1 32           | 283183.2160   | 0.0227         | 0.050          |
| 12 0 12                                                                                       | 11 0 11           | 103998.4810   | 0.0120         | 0.050          | 34 1 34       | 33 1 33           | 291736.8910   | -0.0696        | 0.050          |
| 13 0 13                                                                                       | 12 0 12           | 112654.0590   | -0.0580        | 0.050          | 35 1 35       | 34 1 34           | 300288.3190   | -0.1272        | 0.050          |
| 14 0 14                                                                                       | 13 0 13           | 121307.2370   | 0.0565         | 0.050          | 36 1 36       | 35 1 35           | 308837.5260   | -0.0814        | 0.050          |
| 15 0 15                                                                                       | 14 0 14           | 129957.4710   | -0.0016        | 0.050          | 37 1 37       | 36 1 36           | 317384.4490   | 0.0455         | 0.050          |
| 16 0 16                                                                                       | 15 0 15           | 138604.6700   | -0.1401        | 0.050          | 38 1 38       | 37 1 37           | 325928.8020   | 0.0070         | 0.050          |
| 17 0 17                                                                                       | 16 0 16           | 147248.8260   | -0.1869        | 0.050          | 39 1 39       | 38 1 38           | 334470.6160   | -0.1282        | 0.050          |



| J' Ka' Kc' F' | J'' Ka'' Kc'' F'' | obs.<br>(MHz) | o.-c.<br>(MHz) | error<br>(MHz) | J' Ka' Kc' F' | J'' Ka'' Kc'' F'' | obs.<br>(MHz) | o.-c.<br>(MHz) | error<br>(MHz) |
|---------------|-------------------|---------------|----------------|----------------|---------------|-------------------|---------------|----------------|----------------|
| 40 1 40       | 39 1 39           | 343010.1490   | -0.0662        | 0.050          | 27 2 26       | 26 2 25           | 234088.1250   | 0.0727         | 0.050          |
| 41 1 41       | 40 1 40           | 351547.2590   | 0.0855         | 0.050          | 28 2 27       | 27 2 26           | 242738.3090   | 0.0422         | 0.050          |
| 42 1 42       | 41 1 41           | 360081.6650   | 0.0791         | 0.050          | 29 2 28       | 28 2 27           | 251386.4480   | 0.0707         | 0.050          |
|               |                   |               |                |                | 30 2 29       | 29 2 28           | 260032.3910   | 0.0742         | 0.050          |
| 2 1 1         | 1 1 0             | 17504.6800    | 0.0736         | 0.050          | 31 2 30       | 30 2 29           | 268676.1360   | 0.1167         | 0.050          |
| 3 1 2         | 2 1 1             | 26256.7100    | 0.0570         | 0.050          | 32 2 31       | 31 2 30           | 277317.4920   | 0.0724         | 0.050          |
| 4 1 3         | 3 1 2             | 35008.4300    | 0.0383         | 0.050          | 33 2 32       | 32 2 31           | 285956.5910   | 0.1375         | 0.050          |
| 5 1 4         | 4 1 3             | 43759.6000    | -0.1197        | 0.050          | 34 2 33       | 33 2 32           | 294593.2450   | 0.1876         | 0.050          |
| 6 1 5         | 5 1 4             | 52510.5630    | 0.0283         | 0.050          | 35 2 34       | 34 2 33           | 303227.2980   | 0.1288         | 0.050          |
| 7 1 6         | 6 1 5             | 61260.7340    | 0.0003         | 0.050          | 36 2 35       | 35 2 34           | 311858.7810   | 0.0538         | 0.050          |
| 8 1 7         | 7 1 6             | 70010.2080    | -0.0061        | 0.050          | 37 2 36       | 36 2 35           | 320487.6960   | 0.0250         | 0.050          |
| 9 1 8         | 8 1 7             | 78758.8490    | -0.0242        | 0.050          | 38 2 37       | 37 2 36           | 329113.8250   | -0.1161        | 0.050          |
| 10 1 9        | 9 1 8             | 87506.6070    | -0.0014        | 0.050          | 39 2 38       | 38 2 37           | 337737.4330   | -0.0463        | 0.050          |
| 11 1 10       | 10 1 9            | 96253.3180    | 0.0010         | 0.050          | 40 2 39       | 39 2 38           | 346358.1370   | -0.0911        | 0.050          |
| 12 1 11       | 11 1 10           | 104998.8860   | -0.0099        | 0.050          | 41 2 40       | 40 2 39           | 354975.8680   | -0.2633        | 0.050          |
| 13 1 12       | 12 1 11           | 113743.2410   | -0.0017        | 0.050          |               |                   |               |                |                |
| 14 1 13       | 13 1 12           | 122486.1730   | -0.0815        | 0.050          | 3 2 1         | 2 2 0             | 26038.2000    | -0.2472        | 0.050          |
| 15 1 14       | 14 1 13           | 131227.9270   | 0.0983         | 0.050          | 4 2 2         | 3 2 1             | 34718.1100    | -0.1397        | 0.050          |
| 16 1 15       | 15 1 14           | 139967.9030   | 0.0408         | 0.050          | 5 2 3         | 4 2 2             | 43398.2650    | -0.0609        | 0.050          |
| 17 1 16       | 16 1 15           | 148706.1240   | -0.1284        | 0.050          | 6 2 4         | 5 2 3             | 52078.6310    | -0.1122        | 0.050          |
| 18 1 17       | 17 1 16           | 157442.8620   | -0.0346        | 0.050          | 7 2 5         | 6 2 4             | 60759.4890    | -0.0795        | 0.050          |
| 19 1 18       | 18 1 17           | 166177.7250   | 0.0329         | 0.050          | 8 2 6         | 7 2 5             | 69440.7720    | -0.0958        | 0.050          |
| 20 1 19       | 19 1 18           | 174910.5960   | 0.0600         | 0.050          | 9 2 7         | 8 2 6             | 78122.5870    | -0.1191        | 0.050          |
| 21 1 20       | 20 1 19           | 183641.4610   | 0.1354         | 0.050          | 10 2 8        | 9 2 7             | 86805.0270    | -0.1203        | 0.050          |
| 22 1 21       | 21 1 20           | 192370.0130   | 0.0546         | 0.050          | 11 2 9        | 10 2 8            | 95488.1310    | -0.1230        | 0.050          |
| 23 1 22       | 22 1 21           | 201096.3660   | 0.0342         | 0.050          | 12 2 10       | 11 2 9            | 104171.9620   | -0.1249        | 0.050          |
| 24 1 23       | 23 1 22           | 209820.3630   | 0.0198         | 0.050          | 13 2 11       | 12 2 10           | 112856.5850   | -0.1202        | 0.050          |
| 25 1 24       | 24 1 23           | 218541.8030   | -0.0873        | 0.050          | 14 2 12       | 13 2 11           | 121542.1130   | -0.0526        | 0.050          |
| 26 1 25       | 25 1 24           | 227260.7990   | -0.0719        | 0.050          | 15 2 13       | 14 2 12           | 130228.4190   | -0.1035        | 0.050          |
| 27 1 26       | 26 1 25           | 235977.1810   | -0.0017        | 0.050          | 16 2 14       | 15 2 13           | 138915.6030   | -0.2246        | 0.050          |
| 28 1 27       | 27 1 26           | 244690.7010   | -0.0229        | 0.050          | 17 2 15       | 16 2 14           | 147603.9630   | -0.1665        | 0.050          |
| 29 1 28       | 28 1 27           | 253401.3880   | -0.0047        | 0.050          | 18 2 16       | 17 2 15           | 156293.3170   | -0.1560        | 0.050          |
| 30 1 29       | 29 1 28           | 262109.0720   | -0.0154        | 0.050          | 19 2 17       | 18 2 16           | 164983.8810   | -0.0181        | 0.050          |
| 31 1 30       | 30 1 29           | 270813.7400   | 0.0330         | 0.050          | 20 2 18       | 19 2 17           | 173675.3920   | -0.0527        | 0.050          |
| 32 1 31       | 31 1 30           | 279515.0450   | -0.1052        | 0.050          | 21 2 19       | 20 2 18           | 182368.2180   | 0.0764         | 0.050          |
| 33 1 32       | 32 1 31           | 288213.2250   | -0.0916        | 0.050          | 22 2 20       | 21 2 19           | 191062.0290   | 0.0127         | 0.050          |
| 34 1 33       | 33 1 32           | 296908.3040   | 0.1980         | 0.050          | 23 2 21       | 22 2 20           | 199757.0680   | -0.0215        | 0.050          |
| 35 1 34       | 34 1 33           | 305599.5880   | 0.1696         | 0.050          | 24 2 22       | 23 2 21           | 208453.3650   | -0.0110        | 0.050          |
| 36 1 35       | 35 1 34           | 314287.2370   | 0.0824         | 0.050          | 25 2 23       | 24 2 22           | 217150.9320   | 0.0484         | 0.050          |
| 37 1 36       | 36 1 35           | 322971.2260   | 0.0103         | 0.050          | 26 2 24       | 25 2 23           | 225849.6710   | 0.0584         | 0.050          |
| 38 1 37       | 37 1 36           | 331651.4570   | -0.0465        | 0.050          | 27 2 25       | 26 2 24           | 234549.6360   | 0.0803         | 0.050          |
| 39 1 38       | 38 1 37           | 340327.9230   | 0.0023         | 0.050          | 28 2 26       | 27 2 25           | 243250.7340   | 0.0367         | 0.050          |
| 40 1 39       | 39 1 38           | 349000.2270   | -0.1433        | 0.050          | 29 2 27       | 28 2 26           | 251953.1080   | 0.0948         | 0.050          |
| 41 1 40       | 40 1 39           | 357668.8020   | 0.0454         | 0.050          | 30 2 28       | 29 2 27           | 260656.5870   | 0.1172         | 0.050          |
|               |                   |               |                |                | 31 2 29       | 30 2 28           | 269361.1960   | 0.1722         | 0.050          |
| 3 2 2         | 2 2 1             | 26038.2000    | 0.3438         | 0.050          | 32 2 30       | 31 2 29           | 278066.7380   | 0.1158         | 0.050          |
| 4 2 3         | 3 2 2             | 34716.9100    | 0.1374         | 0.050          | 33 2 31       | 32 2 30           | 286773.1780   | -0.0233        | 0.050          |
| 5 2 4         | 4 2 3             | 43395.5400    | 0.1671         | 0.050          | 34 2 32       | 33 2 31           | 295480.8970   | 0.2095         | 0.050          |
| 6 2 5         | 5 2 4             | 52073.4700    | -0.1083        | 0.050          | 35 2 33       | 34 2 32           | 304189.1200   | 0.1243         | 0.050          |
| 7 2 6         | 6 2 5             | 60751.2420    | -0.0683        | 0.050          | 36 2 34       | 35 2 33           | 312898.1990   | 0.1688         | 0.050          |
| 8 2 7         | 7 2 6             | 69428.4030    | -0.0873        | 0.050          | 37 2 35       | 36 2 34           | 321607.6950   | 0.0104         | 0.050          |
| 9 2 8         | 8 2 7             | 78104.9430    | -0.0972        | 0.050          | 38 2 36       | 37 2 35           | 330317.8260   | -0.0153        | 0.050          |
| 10 2 9        | 9 2 8             | 86780.7780    | -0.1038        | 0.050          | 39 2 37       | 38 2 36           | 339028.2350   | -0.1373        | 0.050          |
| 11 2 10       | 10 2 9            | 95455.8140    | -0.1235        | 0.050          | 40 2 38       | 39 2 37           | 347738.9940   | -0.1447        | 0.050          |
| 12 2 11       | 11 2 10           | 104130.0100   | -0.1199        | 0.050          | 41 2 39       | 40 2 38           | 356449.7320   | -0.2598        | 0.050          |
| 13 2 12       | 12 2 11           | 112803.2580   | -0.1239        | 0.050          |               |                   |               |                |                |
| 14 2 13       | 13 2 12           | 121475.4960   | -0.1208        | 0.050          |               |                   |               |                |                |
| 15 2 14       | 14 2 13           | 130146.7990   | 0.0408         | 0.050          |               |                   |               |                |                |
| 16 2 15       | 15 2 14           | 138816.7390   | 0.0087         | 0.050          |               |                   |               |                |                |
| 17 2 16       | 16 2 15           | 147485.3600   | -0.0974        | 0.050          |               |                   |               |                |                |
| 18 2 17       | 17 2 16           | 156152.7430   | -0.1219        | 0.050          |               |                   |               |                |                |
| 19 2 18       | 18 2 17           | 164818.8450   | -0.0332        | 0.050          |               |                   |               |                |                |
| 20 2 19       | 19 2 18           | 173483.4660   | 0.0426         | 0.050          |               |                   |               |                |                |
| 21 2 20       | 20 2 19           | 182146.4730   | 0.0458         | 0.050          |               |                   |               |                |                |
| 22 2 21       | 21 2 20           | 190807.8310   | 0.0143         | 0.050          |               |                   |               |                |                |
| 23 2 22       | 22 2 21           | 199467.5590   | 0.0390         | 0.050          |               |                   |               |                |                |
| 24 2 23       | 23 2 22           | 208125.4910   | 0.0254         | 0.050          |               |                   |               |                |                |
| 25 2 24       | 24 2 23           | 216781.6210   | 0.0382         | 0.050          |               |                   |               |                |                |
| 26 2 25       | 25 2 24           | 225435.8490   | 0.0476         | 0.050          |               |                   |               |                |                |

**Table A.4.** Determination of the partition function for transition intensity calculations.

| (a) Evolution of the value of $Q_{\text{vr}}$ on addition of successive vibrational states to the summation |           |                                   |                                 |                                 | (b) Sensitivity of the value of $Q_{\text{vr}}$ to quantum number limits used in the numerical summation |                      |                  |                                 |                                 |       |
|-------------------------------------------------------------------------------------------------------------|-----------|-----------------------------------|---------------------------------|---------------------------------|----------------------------------------------------------------------------------------------------------|----------------------|------------------|---------------------------------|---------------------------------|-------|
| $J_{\text{lim}} = 50, K_{\text{lim}} = 15$                                                                  |           | $E_{\text{vib}} (\text{cm}^{-1})$ | $Q_{\text{vr}} (300 \text{ K})$ | $Q_{\text{vr}} (120 \text{ K})$ |                                                                                                          | $J_{\text{lim}}$     | $K_{\text{lim}}$ | $Q_{\text{vr}} (300 \text{ K})$ | $Q_{\text{vr}} (120 \text{ K})$ |       |
|                                                                                                             | $v_b = 0$ | $m = 0$                           | 0.0                             | 15055                           | 4474                                                                                                     | all <sup>a</sup>     | 50               | 10                              | 113660                          | 18021 |
| +                                                                                                           |           | $m = 1$                           | 8.4                             | 29292                           | 8509                                                                                                     | all                  | 70               | 10                              | 132301                          | 18223 |
| +                                                                                                           |           | $m = 2$                           | 36.8                            | 41716                           | 11379                                                                                                    | all                  | 100              | 10                              | 136409                          | 18225 |
| +                                                                                                           |           | $m = 3\text{L}$                   | 80.3                            | 51802                           | 13083                                                                                                    | all                  | 50               | 15                              | 117404                          | 18035 |
| +                                                                                                           |           | $m = 3\text{U}$                   | 79.7                            | 61916                           | 14799                                                                                                    | all                  | 70               | 15                              | 136815                          | 18237 |
| +                                                                                                           |           | $m = 4$                           | 140.6                           | 69468                           | 15626                                                                                                    | all                  | 100              | 15 <sup>b</sup>                 | 141159                          | 18240 |
| +                                                                                                           |           | $m = 5$                           | 217.5                           | 74691                           | 15955                                                                                                    |                      |                  |                                 |                                 |       |
| +                                                                                                           |           | $m = 6\text{a}$                   | 311.1                           | 78025                           | 16062                                                                                                    |                      |                  |                                 |                                 |       |
| +                                                                                                           |           | $m = 6\text{b}$                   | 311.1                           | 81359                           | 16169                                                                                                    |                      |                  |                                 |                                 |       |
| +                                                                                                           | $v_b = 1$ | $m = 0$                           | 182.2                           | 87546                           | 16671                                                                                                    | <u>Recommended:</u>  |                  |                                 |                                 |       |
|                                                                                                             |           | $m = 1$                           | 191.4                           | 93465                           | 17121                                                                                                    |                      |                  |                                 |                                 |       |
|                                                                                                             |           | $m = 2$                           | 222.3                           | 98569                           | 17431                                                                                                    |                      | 100              | 11                              |                                 |       |
|                                                                                                             |           | $m = 3\text{a}$                   | 268.3                           | 102663                          | 17610                                                                                                    | all                  |                  |                                 | 138369                          | 18235 |
|                                                                                                             |           | $m = 3\text{b}$                   | 268.9                           | 106745                          | 17788                                                                                                    | only $v_b, m = 0, 0$ |                  |                                 | 17744                           | 4524  |
|                                                                                                             |           | $m = 4$                           | 333.4                           | 109741                          | 17870                                                                                                    | only $v_b, m = 0, 0$ | analytical       |                                 | 17831                           | 4511  |
| +                                                                                                           | $v_b = 2$ | $m = 0$                           | 357.9                           | 112405                          | 17931                                                                                                    |                      |                  |                                 |                                 |       |
|                                                                                                             |           | $m = 1$                           | 368.6                           | 114935                          | 17984                                                                                                    |                      |                  |                                 |                                 |       |
|                                                                                                             |           | $m = 2$                           | 402.5                           | 117404                          | 18035                                                                                                    |                      |                  |                                 |                                 |       |

**Notes.**

<sup>a</sup>Summation over all vibrational states up to  $402.5 \text{ cm}^{-1}$  ( $v_b = 2, m = 2$ ). <sup>b</sup>Energy level compression problems at highest  $K$  and  $J$  due to large values of some centrifugal distortion constants in the effective fit.

**Table A.5.** Line list of rotational transitions for CH<sub>3</sub>NCO compiled from experimental frequencies (MHz) for line sequences assigned on the basis of continuity from the assignment reached for  $J'' \leq 3$ .(a)  $v_b=0$ ,  $m=0$  (ground state),  $E_{\text{vib}} = 0 \text{ cm}^{-1}$ 

| $K^a =$  |       | 0                     | 1L                      | 1U         | 2L         | 2U         | 3L         | 3U         |
|----------|-------|-----------------------|-------------------------|------------|------------|------------|------------|------------|
| $J'$     | $J''$ |                       |                         |            |            |            |            |            |
| 1        | 0     | 8671.410 <sup>b</sup> |                         |            |            |            |            |            |
| 2        | 1     | 17342.500             | 17190.670               | 17504.680  |            |            |            |            |
| 3        | 2     | 26013.340             | 25785.410               | 26256.710  | 26038.200  | 26038.200  |            |            |
| 4        | 3     | 34683.460             | 34380.140               | 35008.430  | 34716.910  | 34718.110  | 34596.030  | 34596.030  |
| 5        | 4     | 43352.763             | 42974.430               | 43759.600  | 43395.540  | 43398.265  | 43244.392  | 43244.392  |
| 6        | 5     | 52021.106             | 51568.529               | 52510.563  | 52073.470  | 52078.631  | 51891.662  | 51891.662  |
| 7        | 6     | 60688.210             | 60162.076               | 61260.734  | 60751.242  | 60759.489  | 60538.443  | 60538.443  |
| 8        | 7     | 69353.880             | 68755.025               | 70010.208  | 69428.403  | 69440.772  | 69184.277  | 69184.277  |
| 9        | 8     | 78017.953             | 77347.425               | 78758.849  | 78104.943  | 78122.587  | 77829.107  | 77829.107  |
| 10       | 9     | 86680.190             | 85938.962               | 87506.607  | 86780.778  | 86805.027  | 86472.805  | 86472.805  |
| 11       | 10    | 95340.443             | 94529.761               | 96253.318  | 95455.814  | 95488.131  | 95115.214  | 95115.214  |
| 12       | 11    | 103998.481            | 103119.703              | 104998.886 | 104130.010 | 104171.962 | 103756.254 | 103756.254 |
| 13       | 12    | 112654.059            | 111708.707              | 113743.241 | 112803.258 | 112856.585 | 112395.756 | 112395.756 |
| 14       | 13    | 121307.237            | 120296.630              | 122486.173 | 121475.496 | 121542.113 | 121033.586 | 121033.586 |
| 15       | 14    | 129957.471            | 128883.644              | 131227.927 | 130146.799 | 130228.419 | 129669.703 | 129669.703 |
| 16       | 15    | 138604.670            | 137469.287              | 139967.903 | 138816.739 | 138915.603 | 138303.496 | 138304.065 |
| 17       | 16    | 147248.826            | 146053.574              | 148706.124 | 147485.360 | 147603.963 | 146935.424 | 146936.284 |
| 18       | 17    | 155889.867            | 154636.867              | 157442.862 | 156152.743 | 156293.317 | 155565.312 | 155566.394 |
| 19       | 18    | 164527.308            | 163218.602              | 166177.725 | 164818.845 | 164983.881 | 164192.884 | 164194.278 |
| 20       | 19    | 173161.061            | 171798.990              | 174910.596 | 173483.466 | 173675.392 | 172817.892 | 172819.679 |
| 21       | 20    | 181791.104            | 180377.768 <sup>c</sup> | 183641.461 | 182146.473 | 182368.218 | 181440.422 | 181442.696 |
| 22       | 21    | 190417.024            | 188955.100              | 192370.013 | 190807.831 | 191062.029 | 190060.149 | 190062.937 |
| 23       | 22    | 199038.846            | 197530.555              | 201096.366 | 199467.559 | 199757.068 | 198677.070 | 198680.500 |
| 24       | 23    | 207656.434            | 206104.447              | 209820.363 | 208125.491 | 208453.365 | 207291.046 | 207295.249 |
| 25       | 24    | 216269.674            | 214676.530              | 218541.803 | 216781.621 | 217150.932 | 215902.003 | 215907.102 |
| 26       | 25    | 224878.354            | 223246.826              | 227260.799 | 225435.849 | 225849.671 | 224509.835 | 224515.940 |
| 27       | 26    | 233482.392            | 231815.250              | 235977.181 | 234088.125 | 234549.636 | 233114.404 | 233121.696 |
| 28       | 27    | 242081.680            | 240381.664              | 244690.701 | 242738.309 | 243250.734 | 241715.637 | 241724.217 |
| 29       | 28    | 250676.140            | 248946.150              | 253401.388 | 251386.448 | 251953.108 | 250313.498 | 250323.521 |
| 30       | 29    | 259265.708            | 257508.601              | 262109.072 | 260032.391 | 260656.587 | 258907.935 | 258919.578 |
| 31       | 30    | 267850.163            | 266068.926              | 270813.740 | 268676.136 | 269361.196 | 267498.881 | 267512.332 |
| 32       | 31    | 276429.652            | 274627.141              | 279515.045 | 277317.492 | 278066.738 | 276086.286 | 276101.741 |
| 33       | 32    | 285003.841            | 283183.216              | 288213.225 | 285956.591 | 286773.178 | 284670.169 | 284687.756 |
| 34       | 33    | 293572.990            | 291736.891              | 296908.304 | 294593.245 | 295480.897 | 293250.547 | 293270.510 |
| 35       | 34    | 302136.898            | 300288.319              | 305599.588 | 303227.298 | 304189.120 | 301827.305 | 301849.816 |
| 36       | 35    | 310695.427            | 308837.526              | 314287.237 | 311858.781 | 312898.199 | 310400.543 | 310425.797 |
| 37       | 36    | 319248.753            | 317384.449              | 322971.226 | 320487.696 | 321607.695 | 318970.615 | 318998.776 |
| 38       | 37    | 327797.050            | 325928.802              | 331651.457 | 329113.825 | 330317.826 | 327536.993 | 327568.310 |
| 39       | 38    | 336339.886            | 334470.616              | 340327.923 | 337737.433 | 339028.235 | 336099.791 | 336134.374 |
| 40       | 39    | 344877.468            | 343010.149              | 349000.227 | 346358.137 | 347738.994 | 344659.995 | 344698.049 |
| 41       | 40    | 353409.883            | 351547.259              | 357668.802 | 354975.868 | 356449.732 | 353216.538 | 353258.418 |
| 42       | 41    | 361937.203            | 360081.665              |            |            |            | 361770.522 | 361816.048 |
| sequence |       | V093                  | V126                    | V131       | V089       | V006       | V096       | V097       |

a - The  $K$  quantum number notation is defined in the text below Eq. A.1.b - all frequencies for  $J'' > 3$  (unless otherwise marked) are experimental measurements with estimated uncertainty of 0.05 MHz. The frequencies for  $J'' = 0$  to 3 are hyperfine removed frequencies evaluated by Koput.c - calculated from a  $J(J+1)$  power series fit to the sequence.

(b)  $v_b=0$ ,  $m=1$ ,  $E_{\text{vib}} = 8.4 \text{ cm}^{-1}$ 

| $K =$    |       | 0                       | -1                      | 1          | 2          | -3         | 3          |
|----------|-------|-------------------------|-------------------------|------------|------------|------------|------------|
| $J'$     | $J''$ |                         |                         |            |            |            |            |
| 1        | 0     | 8714.599                |                         |            |            |            |            |
| 2        | 1     | 17426.089               | 17131.350               | 17139.540  |            |            |            |
| 3        | 2     | 26131.320               | 25696.960               | 25711.200  | 26102.200  |            |            |
| 4        | 3     | 34827.319               | 34262.960               | 34285.420  | 34803.370  | 34746.730  | 34848.720  |
| 5        | 4     | 43511.298               | 42829.348               | 42862.701  | 43504.452  | 43433.533  | 43560.652  |
| 6        | 5     | 52181.118               | 51396.202               | 51443.858  | 52206.120  | 52119.989  | 52272.360  |
| 7        | 6     | 60834.588               | 59963.808               | 60029.019  | 60907.932  | 60806.734  | 69694.881  |
| 8        | 7     | 69470.354               | 68532.241               | 68618.612  | 69610.243  | 69493.349  | 78405.765  |
| 9        | 8     | 78087.660               | 77101.788               | 77212.768  | 78312.951  | 78180.079  | 87116.220  |
| 10       | 9     | 86686.556               | 85672.565               | 85811.546  | 87016.078  | 86866.748  | 95826.264  |
| 11       | 10    | 95267.825               | 94244.905               | 94414.872  | 95719.797  | 95553.457  | 104535.872 |
| 12       | 11    | 103832.990              | 102819.142              | 103022.546 | 104424.130 | 104240.089 | 113245.010 |
| 13       | 12    | 112384.189              | 111395.453              | 111634.362 | 113129.051 | 112926.739 | 121953.658 |
| 14       | 13    | 120923.957              | 119974.084              | 120250.061 | 121834.685 | 121613.360 | 130661.691 |
| 15       | 14    | 129455.041              | 128555.310              | 128869.183 | 130541.066 | 130300.215 | 139369.066 |
| 16       | 15    | 137980.105              | 137139.779              | 137491.243 | 139248.143 | 138986.740 | 148075.687 |
| 17       | 16    | 146501.448              | 145726.977              | 146115.877 | 147956.022 | 147673.312 | 156781.803 |
| 18       | 17    | 155021.205              | 154317.714              | 154742.833 | 156664.792 | 156360.035 | 165487.174 |
| 19       | 18    | 163541.133              | 162911.754              | 163371.518 | 165374.452 | 165046.706 | 174191.731 |
| 20       | 19    | 172061.977              | 171509.498              | 172001.511 | 174085.007 | 173733.277 | 182895.436 |
| 21       | 20    | 180584.517 <sup>a</sup> | 180110.821 <sup>a</sup> | 180632.418 | 182796.656 | 182419.917 | 191598.170 |
| 22       | 21    | 189109.455              | 188715.886              | 189263.550 | 191508.907 | 191106.420 | 200300.118 |
| 23       | 22    | 197636.492              | 197324.512              | 197894.577 | 200222.279 | 199792.672 | 209001.126 |
| 24       | 23    | 206165.981              | 205936.596              | 206525.339 | 208936.733 | 208478.868 | 217701.086 |
| 25       | 24    | 214697.618              | 214552.442              | 215155.261 | 217652.088 | 217164.881 | 226400.016 |
| 26       | 25    | 223231.128              | 223171.503              | 223783.952 | 226368.543 | 225850.618 | 235097.875 |
| 27       | 26    | 231766.341              | 231793.783              | 232411.044 | 235085.938 | 234535.866 | 243794.484 |
| 28       | 27    | 240302.835              | 240418.979              | 241036.217 | 243804.350 | 243220.575 | 252490.045 |
| 29       | 28    | 248840.351              | 249047.052              | 249659.091 | 252523.689 | 251904.576 | 261184.367 |
| 30       | 29    | 257378.635              | 257677.673              | 258279.428 | 261243.934 | 260587.611 | 269877.354 |
| 31       | 30    | 265917.341              | 266310.654              | 266896.862 | 269964.935 | 269269.306 | 278569.028 |
| 32       | 31    | 274456.286              | 274945.807              | 275511.130 | 278686.471 | 277949.280 | 287259.016 |
| 33       | 32    | 282995.138              | 283582.597              | 284122.057 | 287408.067 | 286626.968 | 295948.943 |
| 34       | 33    | 291533.591              | 292221.402              | 292729.120 | 296130.228 | 295302.132 | 304636.157 |
| 35       | 34    | 300071.437              | 300861.390              | 301332.036 | 304850.123 | 303973.342 | 313322.215 |
| 36       | 35    | 308608.768              | 309502.679              | 309930.935 | b          | 312639.870 | 322006.608 |
| 37       | 36    | 317145.274              | 318145.064              | 318525.546 | b          | 321299.883 | 330689.686 |
| 38       | 37    | 325680.738              | 326788.371              | 327115.335 | b          | 329952.435 | 339370.491 |
| 39       | 38    | 334214.702              | 335432.305              | 335700.385 | b          | 338594.440 | 348050.671 |
| 40       | 39    | 342747.571              | 344077.189              | 344280.710 | b          | 347223.487 | 356728.558 |
| 41       | 40    | 351278.907              | 352722.522              | 352855.727 | b          | 355835.853 |            |
| 42       | 41    | 359808.783              | 361368.607              | 361425.535 | b          |            |            |
| sequence |       | V107+X107               | V101                    | V098       | V010       | V005       | V012       |

a - calculated from a  $J(J+1)$  power series fit to the sequence.

b - sequence too perturbed for confident assignment.

(c)  $v_b=0$ ,  $m=-2$ ,  $E_{\text{vib}} = 36.8 \text{ cm}^{-1}$ 

| $K =$    |       | 0                        | -1         | 1          | 2                       | -3         | 3          |
|----------|-------|--------------------------|------------|------------|-------------------------|------------|------------|
| $J'$     | $J''$ |                          |            |            |                         |            |            |
| 1        | 0     | 8712.440                 |            |            |                         |            |            |
| 2        | 1     | 17424.730                | 17413.270  | 17404.820  |                         |            |            |
| 3        | 2     | 26137.030                | 26119.520  | 26109.160  | 25664.890               |            |            |
| 4        | 3     | 34849.040                | 34825.770  | 34816.500  | 34225.420               | 34934.900  | 34961.090  |
| 5        | 4     | 43560.897 <sup>a,b</sup> | 43532.117  | 43527.498  | 42790.309               | 43668.171  | 43682.672  |
| 6        | 5     | 52272.451 <sup>a,b</sup> | 52238.073  | 52242.597  | 51360.437               | 52401.386  | 52392.272  |
| 7        | 6     | 60983.669 <sup>a,b</sup> | 60944.058  | 60962.565  | 59936.461               | 61134.338  | 61088.422  |
| 8        | 7     | 69694.485                | 69649.804  | 69687.625  | 68518.731               | 69866.924  | 69769.729  |
| 9        | 8     | 78404.856                | 78355.412  | 78417.926  | 77107.514               | 78599.133  | 78435.325  |
| 10       | 9     | 87114.738                | 87060.710  | 87153.379  | 85702.751               | 87330.888  | 87084.556  |
| 11       | 10    | 95824.056                | 95765.763  | 95893.514  | 94304.411               | 96062.185  | 95717.491  |
| 12       | 11    | 104532.714               | 104470.566 | 104637.665 | 102912.045              | 104793.013 | 104334.474 |
| 13       | 12    | 113240.653               | 113175.049 | 113384.876 | 111525.320              | 113523.228 | 112936.205 |
| 14       | 13    | 121947.700               | 121879.231 | 122134.022 | 120143.754              | 122252.995 | 121523.853 |
| 15       | 14    | 130653.851               | 130583.038 | 130883.320 | 128766.726              | 130982.052 | 130098.915 |
| 16       | 15    | 139358.532               | 139286.363 | 139631.255 | 137393.143              | 139710.254 | 138663.325 |
| 17       | 16    | 148061.901               | 147989.218 | 148376.092 | 146022.743              | 148437.799 | 147218.459 |
| 18       | 17    | 156763.754               | 156691.751 | 157116.399 | 154654.800              | 157164.567 | 155766.873 |
| 19       | 18    | 165463.564               | 165393.941 | 165850.049 | 163288.573              | 165890.628 | 164310.386 |
| 20       | 19    | 174161.002               | 174095.570 | 174575.538 | 171923.201              | 174615.757 | 172850.953 |
| 21       | 20    | 182855.593               | 182796.656 | 183291.443 | 180558.028 <sup>a</sup> | 183339.996 | 181390.412 |
| 22       | 21    | 191546.894               | 191497.178 | 191996.548 | 189192.720              | 192063.146 | 189930.316 |
| 23       | 22    | 200234.301               | 200197.129 | 200690.051 | 197826.437              | 200785.291 | 198472.093 |
| 24       | 23    | 208917.318               | 208896.491 | 209371.092 | 206458.663              | 209506.446 | 207017.068 |
| 25       | 24    | 217595.174               | 217595.174 | 218039.456 | 215089.004              | 218226.496 | 215566.166 |
| 26       | 25    | 226267.092               | 226293.413 | 226694.967 | 223717.009              | 226945.439 | 224120.207 |
| 27       | 26    | 234932.492 <sup>a</sup>  | 234990.914 | 235337.649 | 232342.227              | 235663.096 | 232679.828 |
| 28       | 27    | 243590.630               | 243687.653 | 243967.818 | 240964.280              | 244379.611 | 241245.454 |
| 29       | 28    | 252240.796               | 252383.755 | 252585.612 | 249582.840              | 253094.867 | 249817.533 |
| 30       | 29    | 260882.339               | 261079.084 | 261192.583 | 258197.662              | 261808.735 | 258396.339 |
| 31       | 30    | 269514.732               | 269773.683 | 269788.424 | 266808.428              | 270521.346 | 266982.150 |
| 32       | 31    | 278137.623               | 278467.359 | 278374.254 | 275414.952              | 279232.105 | 275575.274 |
| 33       | 32    | 286750.691               | 287160.285 | 286951.163 | 284016.740              | 287942.047 | 284176.013 |
| 34       | 33    | 295354.251               | 295852.776 | 295520.181 | 292614.021              | 296650.575 | 292784.604 |
| 35       | 34    | 303947.944               | 304543.877 | 304081.558 | 301205.925              | 305357.256 | 301401.555 |
| 36       | 35    | 312532.293               | 313234.118 | 312636.900 | 309792.917              | 314062.421 | 310027.841 |
| 37       | 36    | 321107.766               | 321923.326 | 321186.461 | 318374.616              | 322765.830 | 318664.379 |
| 38       | 37    | 329675.596               | 330611.777 | 329732.148 | 326950.804              | 331468.033 | 327312.231 |
| 39       | 38    | 338235.598               | 339298.928 | 338273.907 | 335521.348              | 340168.379 | 335973.272 |
| 40       | 39    | 346789.247               | 347985.229 | 346813.067 | 344086.535              | 348867.181 | 344650.251 |
| 41       | 40    | 355337.165               | 356670.230 | 355350.283 | 352645.714              | 357564.298 | 353345.626 |
| 42       | 41    |                          |            |            | 361199.462              |            | 362063.629 |
| sequence |       | V119                     | V008       | V180       | V100                    | V024       | V106+X106  |

a - calculated from a  $J(J+1)$  power series fit to the sequence.

b - not measured since blended with another sequence.

(d)  $v_b=0, m=3L, E_{\text{vib}} = 80.3 \text{ cm}^{-1}$ 

| $K =$    |       | 0                       | -1                     | 1                       | 2                       | 3          |
|----------|-------|-------------------------|------------------------|-------------------------|-------------------------|------------|
| $J'$     | $J''$ |                         |                        |                         |                         |            |
| 1        | 0     | 8722.070                |                        |                         |                         |            |
| 2        | 1     | 17444.100               | 17504.680              | 17448.710               |                         |            |
| 3        | 2     | 26166.190               | 26257.660              | 26172.870               | 26217.200               |            |
| 4        | 3     | 34888.140               | 35011.480              | 34896.830               | 34956.060               | 35028.630  |
| 5        | 4     | 43609.928               | 43766.214              | 43620.571               | 43694.834               | 43785.654  |
| 6        | 5     | 52331.868               | 52522.551              | 52344.346               | 52433.136               | 52542.085  |
| 7        | 6     | 61053.565               | 61280.451 <sup>a</sup> | 61067.774               | 61171.238               | 61298.342  |
| 8        | 7     | 69775.192               | 70040.195              | 69790.946               | 69909.074               | 70054.280  |
| 9        | 8     | 78496.665               | 78801.997              | 78513.797               | 78646.527               | 78809.809  |
| 10       | 9     | 87218.054               | 87565.977              | 87236.266               | 87383.509               | 87564.879  |
| 11       | 10    | 95939.244               | 96332.237              | 95958.329               | 96120.050               | 96319.430  |
| 12       | 11    | 104660.269              | 105100.806             | 104679.971              | 104856.074              | 105073.483 |
| 13       | 12    | 113381.115              | 113871.438             | 113401.139              | 113591.533              | 113826.888 |
| 14       | 13    | 122101.880              | 122644.153             | 122121.912              | 122326.370              | 122579.897 |
| 15       | 14    | 130822.366              | 131418.379             | 130841.787              | 131060.695              | 131331.907 |
| 16       | 15    | 139542.464              | 140193.007             | 139561.260              | 139794.246 <sup>a</sup> | 140083.196 |
| 17       | 16    | 148262.442              | 148967.780             | 148280.088              | 148526.918              | 148833.657 |
| 18       | 17    | 156982.205              | 157741.459             | 156998.138              | 157259.087              | 157583.442 |
| 19       | 18    | 165701.855              | 166512.305             | 165715.596              | 165990.220              | 166332.231 |
| 20       | 19    | 174421.255              | 175278.820             | 174432.265              | 174720.445              | 175080.257 |
| 21       | 20    | 183140.586              | 184038.905             | 183148.090              | 183449.784              | 183827.235 |
| 22       | 21    | 191859.411              | 192789.989             | 191863.107              | 192178.078              | 192573.044 |
| 23       | 22    | 200577.940 <sup>a</sup> | 201529.781             | 200577.113 <sup>a</sup> | 200905.313              | 201317.746 |
| 24       | 23    | 209296.343              | 210255.519             | 209290.275              | 209631.511              | 210061.385 |
| 25       | 24    | 218014.630              | 218964.185             | 218002.461              | 218356.609              | 218803.854 |
| 26       | 25    | 226732.746              | 227652.903             | 226713.682              | 227080.543              | 227544.975 |
| 27       | 26    | 235450.617              | 236318.690             | 235423.772              | 235803.211              | 236284.963 |
| 28       | 27    | 244168.331              | 244958.968             | 244132.818              | 244524.636              | 245023.577 |
| 29       | 28    | 252885.887              | 253571.479             | 252840.703              | 253244.748              | 253760.717 |
| 30       | 29    | 261603.311              | 262154.856             | 261547.430              | 261963.534              | 262496.451 |
| 31       | 30    | 270320.529              | 270708.260             | 270253.052              | 270680.897              | 271231.791 |
| 32       | 31    | 279037.620              | 279232.105             | 278957.203              | 279396.720              | 279962.773 |
| 33       | 32    | 287754.622              | 287727.766             | 287660.097              | 288110.813              | 288694.607 |
| 34       | 33    | 296471.734              | 296199.254             | 296361.967              | 296824.183              | 297424.153 |
| 35       | 34    | 305188.310              | 304649.763             | 305062.223              | 305535.487              | 306152.116 |
| 36       | 35    | 313904.998              | 313084.650             | 313760.953              | 314244.899              | 314878.144 |
| 37       | 36    | 322621.009              | 321509.320             | 322458.384              | 322952.760              | 323602.325 |
| 38       | 37    | 331337.282              | 329929.323             | 331154.531              | 331658.794              | 332324.862 |
| 39       | 38    | 340052.790              | 338348.803             | 339848.777              | 340363.324              | b          |
| 40       | 39    | 348767.954              | 346771.793             | 348541.475              | 349065.775              | b          |
| 41       | 40    | 357482.199              | 355200.745             | 357232.817              | 357766.597              | b          |
| 42       | 41    |                         |                        |                         |                         |            |
| sequence |       | V017                    | V137                   | V082                    | V030                    | V040       |

a - calculated from a  $J(J+1)$  power series fit to the sequence.

b - not measured owing to the appearance of additional small doubling and blending with another sequence.

|          |       | (e) $v_b=0, m=3U, E_{\text{vib}} = 79.7 \text{ cm}^{-1}$ |                         |                         | $v_b=0, m=4, 140.6 \text{ cm}^{-1}$ | $v_b=0, m=-5, 217.5 \text{ cm}^{-1}$ |
|----------|-------|----------------------------------------------------------|-------------------------|-------------------------|-------------------------------------|--------------------------------------|
| $K =$    |       | 0                                                        | -1                      | 2                       | 0                                   | 0                                    |
| $J'$     | $J''$ |                                                          |                         |                         |                                     |                                      |
| 1        | 0     | 8722.930                                                 |                         |                         | 8737.510                            | 8755.450                             |
| 2        | 1     | 17445.790                                                | 17454.140               |                         | 17474.880                           | 17510.750                            |
| 3        | 2     | 26168.670                                                | 26181.160               | 26217.200               | 26212.280                           | 26265.930                            |
| 4        | 3     | 34891.510                                                | 34907.990               | 34956.060               | 34949.500                           | 35021.170                            |
| 5        | 4     | 43614.169                                                | 43634.803               | 43694.834               | 43686.558                           | 43776.052                            |
| 6        | 5     | 52337.008                                                | 52361.126               | 52433.136               | 52423.467                           | 52530.822                            |
| 7        | 6     | 61059.598                                                | 61087.316               | 61171.238               | 61160.109                           | 61285.235                            |
| 8        | 7     | 69782.154                                                | 69813.257               | 69909.074               | 69896.532                           | 70039.333                            |
| 9        | 8     | 78504.575                                                | 78538.859               | 78646.527               | 78632.611                           | 78793.106                            |
| 10       | 9     | 87226.921                                                | 87264.103               | 87383.509               | 87368.415                           | 87546.486                            |
| 11       | 10    | 95949.108                                                | 95988.904               | 96120.050               | 96103.815                           | 96299.372                            |
| 12       | 11    | 104671.232                                               | 104713.296              | 104856.074              | 104838.731                          | 105051.763                           |
| 13       | 12    | 113393.159                                               | 113437.179              | 113591.533              | 113573.462                          | 113803.590                           |
| 14       | 13    | 122115.041                                               | 122160.503              | 122326.370              | 122307.385                          | 122554.987                           |
| 15       | 14    | 130836.609                                               | 130883.320              | 131060.695              | 131040.907                          | 131305.539                           |
| 16       | 15    | 139558.099                                               | 139605.335              | 139793.874 <sup>a</sup> | 139773.828                          | 140055.353                           |
| 17       | 16    | 148279.376                                               | 148326.896              | 148526.393              | 148506.076                          | 148804.383                           |
| 18       | 17    | 157000.493                                               | 157047.593              | 157258.419              | 157237.942                          | 157552.953                           |
| 19       | 18    | 165721.632                                               | 165767.724              | 165989.446              | 165969.028                          | 166300.585                           |
| 20       | 19    | 174442.476                                               | 174486.974              | 174719.575              | 174699.344                          | 175047.384                           |
| 21       | 20    | 183163.236                                               | 183205.461              | 183448.801              | 183429.044                          | 183793.009                           |
| 22       | 21    | 191883.717                                               | 191922.912              | 192176.926              | 192157.781                          | 192537.886                           |
| 23       | 22    | 200604.112                                               | 200639.521              | 200903.965              | 200885.786                          | 201281.751 <sup>a,b</sup>            |
| 24       | 23    | 209324.337                                               | 209355.240              | 209630.000              | 209612.881                          | 210024.510 <sup>a,b</sup>            |
| 25       | 24    | 218044.534                                               | 218069.900              | 218354.946              | 218339.144                          | 218766.186                           |
| 26       | 25    | 226764.650                                               | 226783.590              | 227078.696              | 227064.506                          | 227506.674                           |
| 27       | 26    | 235484.635                                               | 235496.154              | 235801.163              | 235788.832                          | 236245.972                           |
| 28       | 27    | 244204.559                                               | 244207.596              | 244522.386              | 244512.199                          | 244984.016                           |
| 29       | 28    | 252924.508                                               | 252917.912              | 253242.286              | 253234.561                          | 253720.771                           |
| 30       | 29    | 261644.369                                               | 261626.983              | 261960.792              | 261955.843                          | 262456.197                           |
| 31       | 30    | 270364.327                                               | 270334.789              | 270677.907              | 270676.015                          | 271190.307                           |
| 32       | 31    | 279084.315                                               | 279041.258              | 279393.357              | 279395.008                          | 279922.741                           |
| 33       | 32    | 287804.144                                               | 287746.709 <sup>a</sup> | 288107.240              | 288112.677                          | 288653.970                           |
| 34       | 33    | 296524.473                                               | 296450.663              | 296820.277              | 296829.834                          | 297383.564                           |
| 35       | 34    | 305244.523                                               | 305153.091              | 305531.426              | 305545.340                          | 306111.655                           |
| 36       | 35    | 313964.548                                               | 313854.002              | 314240.338              | 314259.408                          | 314838.069                           |
| 37       | 36    | 322684.235                                               | 322553.329              | 322947.835              | 322972.358                          | 323562.679                           |
| 38       | 37    | 331404.493                                               | 331251.686              | 331653.583              | 331683.823                          | 332285.799                           |
| 39       | 38    | 340124.133                                               | 339947.987              | 340357.652              | 340394.140                          | 341007.079                           |
| 40       | 39    | 348843.625                                               | 348642.878              | 349059.672              | 349102.921                          | 349726.678                           |
| 41       | 40    | 357562.542                                               | 357335.976              | 357760.089              | 357810.572                          | 358444.316                           |
| 42       | 41    |                                                          |                         |                         |                                     |                                      |
| sequence |       | V018                                                     | V020                    | V029                    | V025                                | V142                                 |

a - calculated from a  $J(J+1)$  power series fit to the sequence.

b - not measured owing to blending with another sequence.

(f)  $v_b=0, m=0, E_{\text{vib}} = 182.2 \text{ cm}^{-1}$ 

| $K =$    |       | 0                       | 1L                      | 1U                      |
|----------|-------|-------------------------|-------------------------|-------------------------|
| $J'$     | $J''$ |                         |                         |                         |
| 1        | 0     | 8670.610                |                         |                         |
| 2        | 1     | 17340.960               | 17188.670               | 17510.450               |
| 3        | 2     | 26011.020               | 25782.370               | 26265.980               |
| 4        | 3     | 34680.440               | 34376.120               | 35019.950               |
| 5        | 4     | 43349.173               | 42969.421               | 43774.035               |
| 6        | 5     | 52016.906               | 51562.541               | 52527.823               |
| 7        | 6     | 60683.541               | 60155.123               | 61280.888               |
| 8        | 7     | 69348.900               | 68747.151               | 70033.282               |
| 9        | 8     | 78012.766               | 77338.547               | 78784.866               |
| 10       | 9     | 86674.929               | 85929.270               | 87535.510               |
| 11       | 10    | 95335.299               | 94519.235               | 96285.169               |
| 12       | 11    | 103993.608              | 103108.301              | 105033.678              |
| 13       | 12    | 112649.673              | 111696.508              | 113781.001              |
| 14       | 13    | 121303.479              | 120283.613              | 122526.957              |
| 15       | 14    | 129954.672              | 128870.034              | 131271.662              |
| 16       | 15    | 138603.026              | 137454.881              | 140014.495              |
| 17       | 16    | 147248.768 <sup>a</sup> | 146038.531              | 148755.988              |
| 18       | 17    | 155891.279              | 154621.245              | 157495.713              |
| 19       | 18    | 164530.700              | 163202.325              | 166233.670              |
| 20       | 19    | 173166.705              | 171782.207              | 174969.640              |
| 21       | 20    | 181799.215              | 180360.456 <sup>a</sup> | 183703.515              |
| 22       | 21    | 190428.000              | 188937.343              | 192435.609              |
| 23       | 22    | 199053.039              | 197512.392              | 201165.038              |
| 24       | 23    | 207674.136              | 206085.904              | 209892.319              |
| 25       | 24    | 216291.199              | 214657.696              | 218617.180              |
| 26       | 25    | 224904.062              | 223227.702              | 227339.566              |
| 27       | 26    | 233512.629              | 231795.913              | 236059.320              |
| 28       | 27    | 242116.760              | 240362.160              | 244776.394              |
| 29       | 28    | 250716.407              | 248926.484              | 253490.700              |
| 30       | 29    | 259311.510              | 257488.850              | 262201.998              |
| 31       | 30    | 267901.799              | 266049.115              | 270910.320              |
| 32       | 31    | 276487.436              | 274607.275              | 279615.511              |
| 33       | 32    | 285068.035              | 283163.366              | 288317.636              |
| 34       | 33    | 293644.004              | 291717.164              | 297016.541              |
| 35       | 34    | 302214.882              | 300268.707              | 305712.236              |
| 36       | 35    | 310780.705              | 308817.997              | 314404.000              |
| 37       | 36    | 319341.519              | 317365.129              | 323092.435              |
| 38       | 37    | 327897.500              | 325909.693              | 331777.190 <sup>a</sup> |
| 39       | 38    | 336448.316              | 334451.713              | 340458.290              |
| 40       | 39    | 344993.807              | 342991.511              | 349135.442              |
| 41       | 40    | 353534.354              | 351528.890              | 357808.901              |
| 42       | 41    | 362069.899              | 360063.601              |                         |
| sequence |       | V094                    | V127                    | V132                    |

a - calculated from a  $J(J+1)$  power series fit to the sequence.



**Table A.6.** Line list for CH<sub>3</sub>NCO.

| Frequency<br>(MHz) | Error<br>(MHz) | Log(Int)<br><i>a</i> | DR<br><i>b</i> | $E_{\text{low}}$<br>cm <sup>-1</sup> | $g_{\text{upp}}$<br><i>c</i> | TAG<br><i>d</i> | QNFMT<br><i>e</i> | QN'<br><i>f</i> |   |    | QN''<br><i>g</i> |    |   |    |   |
|--------------------|----------------|----------------------|----------------|--------------------------------------|------------------------------|-----------------|-------------------|-----------------|---|----|------------------|----|---|----|---|
| 60688.210          | 0.0500         | -5.0017              | 3              | 6.0737                               | 15                           | 01              | 404               | 7               | 0 | 7  | 0                | 6  | 0 | 6  | 0 |
| 69353.880          | 0.0500         | -4.8323              | 3              | 8.0980                               | 17                           | 01              | 404               | 8               | 0 | 8  | 0                | 7  | 0 | 7  | 0 |
| 78017.953          | 0.0500         | -4.6840              | 3              | 10.4114                              | 19                           | 01              | 404               | 9               | 0 | 9  | 0                | 8  | 0 | 8  | 0 |
| 86680.190          | 0.0500         | -4.5525              | 3              | 13.0138                              | 21                           | 01              | 404               | 10              | 0 | 10 | 0                | 9  | 0 | 9  | 0 |
| 95340.443          | 0.0500         | -4.4348              | 3              | 15.9051                              | 23                           | 01              | 404               | 11              | 0 | 11 | 0                | 10 | 0 | 10 | 0 |
| 103998.481         | 0.0500         | -4.3284              | 3              | 19.0854                              | 25                           | 01              | 404               | 12              | 0 | 12 | 0                | 11 | 0 | 11 | 0 |
| 112654.059         | 0.0500         | -4.2317              | 3              | 22.5544                              | 27                           | 01              | 404               | 13              | 0 | 13 | 0                | 12 | 0 | 12 | 0 |
| 121307.237         | 0.0500         | -4.1434              | 3              | 26.3121                              | 29                           | 01              | 404               | 14              | 0 | 14 | 0                | 13 | 0 | 13 | 0 |

Table following the format of the JPL catalog (see Sect. A.2).

a - Base 10 logarithm of the integrated intensity in units of nm<sup>2</sup> MHz at 300 K.

b - Degrees of freedom in the rotational partition function.

c - Upper state degeneracy.

d - Species tag or molecular identifier.

e - Format of the quantum numbers.

f - Quantum numbers for the upper state.

g - Quantum numbers for the lower state.

This table is available in its entirety at the CDS. A portion is shown here for guidance regarding its form and content.

**Table A.7.** Comparison of rotational transition frequencies for CH<sub>3</sub>NCO between those reported in Halfen et al. (2015) and in this work.

| $J'$              | $K'_a$ | $K'_c$ | $J''$ | $K''_a$ | $K''_c$ | symm. | $m$ | Halfen et al.<br>(2015) | This work  | Difference          |
|-------------------|--------|--------|-------|---------|---------|-------|-----|-------------------------|------------|---------------------|
| <b>measured</b>   |        |        |       |         |         |       |     |                         |            |                     |
| 7                 | -1     | 7      | 6     | -1      | 6       | E     | 1   | 60029.044               | 60029.019  | 0.025               |
| 7                 | 1      | 6      | 6     | 1       | 5       | A     | 0   | 60160.932               | 60162.076  | -1.144 <sup>a</sup> |
| 7                 | 0      | 7      | 6     | 0       | 6       | A     | 0   | 60688.191               | 60688.210  | -0.019              |
| 7                 | 0      | 7      | 6     | 0       | 6       | E     | 1   | 60833.422               | 60834.588  | -1.166 <sup>a</sup> |
| 7                 | 1      | 7      | 6     | 1       | 6       | A     | 0   | 61260.729               | 61260.734  | -0.001              |
| 8                 | -1     | 8      | 7     | -1      | 7       | E     | 1   | 68617.550               | 68618.612  | -1.062 <sup>a</sup> |
| 8                 | 1      | 7      | 7     | 1       | 6       | A     | 0   | 68753.890               | 68755.025  | -1.135 <sup>a</sup> |
| 8                 | 0      | 8      | 7     | 0       | 7       | A     | 0   | 69353.888               | 69353.880  | 0.008               |
| 8                 | 0      | 8      | 7     | 0       | 7       | E     | 1   | 69469.196               | 69470.354  | -1.154 <sup>a</sup> |
| 8                 | 1      | 8      | 7     | 1       | 7       | A     | 0   | 70009.179               | 70010.208  | -1.029 <sup>a</sup> |
| 9                 | 1      | 8      | 8     | 1       | 7       | E     | 1   | 77107.478 <sup>b</sup>  | 77101.788  | 5.690               |
| 9                 | -1     | 9      | 8     | -1      | 8       | E     | 1   | 77211.707               | 77212.768  | -1.061 <sup>a</sup> |
| 9                 | 1      | 8      | 8     | 1       | 7       | A     | 0   | 77347.355               | 77347.425  | -0.070              |
| 9                 | 0      | 9      | 8     | 0       | 8       | A     | 0   | 78017.932               | 78017.953  | -0.021              |
| 9                 | 0      | 9      | 8     | 0       | 8       | E     | 1   | 78087.673               | 78087.660  | 0.013               |
| 9                 | 1      | 9      | 8     | 1       | 8       | A     | 0   | 78758.868               | 78758.849  | 0.019               |
| 10                | -1     | 10     | 9     | -1      | 9       | E     | 1   | 85811.557               | 85811.546  | 0.011               |
| 10                | 1      | 9      | 9     | 1       | 8       | A     | 0   | 85938.967               | 85938.962  | 0.005               |
| 10                | 0      | 10     | 9     | 0       | 9       | A     | 0   | 86680.195               | 86680.190  | 0.005               |
| 10                | 0      | 10     | 9     | 0       | 9       | E     | 1   | 86686.575               | 86686.556  | 0.019               |
| 10                | 1      | 10     | 9     | 1       | 9       | A     | 0   | 87506.605               | 87506.607  | -0.002              |
| <b>calculated</b> |        |        |       |         |         |       |     |                         |            |                     |
| 8                 | 1      | 7      | 7     | 1       | 6       | E     | 1   | 68536.76 <sup>c</sup>   | 68532.241  | 4.519               |
| 10                | 1      | 9      | 9     | 1       | 8       | E     | 1   | 85679.63 <sup>c</sup>   | 85672.565  | 7.065               |
| 11                | 1      | 10     | 10    | 1       | 9       | E     | 1   | 94253.49 <sup>c</sup>   | 94244.905  | 8.585               |
| 12                | 1      | 11     | 11    | 1       | 10      | E     | 1   | 102829.92 <sup>c</sup>  | 102819.142 | 10.778              |

**Notes.**

<sup>(a)</sup>One of seven lines from Halfen et al. (2015) showing a  $\geq 1$  MHz frequency shift relative to the present work. Other lines in the same transition sequences measured in Halfen et al. (2015) do not seem to be affected.

<sup>(b)</sup>This is a bona fide line in our experimental spectrum but our assignment is  $m=-2$ ,  $K=2$  with measured frequency of 77107.514 MHz.

<sup>(c)</sup>Prediction in Halfen et al. (2015) based on the misassigned 77107.478 MHz line. There are no lines in our experimental spectrum at these frequencies, and the actual  $K=+1$ ,  $m=1$  lines are at significantly lower frequencies.

**Table A.8.** Calculated frequencies and relative intensities of nuclear quadrupole splitting components for the  $K_a=0,1,2$  ground state ( $v_b=0, m=0$ ) rotational transitions of CH<sub>3</sub>NCO.

| $F' - F''$                    | $K = 0$<br>$\nu^a / \text{MHz}$ | $I_{\text{rel}}^b$ | $F' - F''$ | $K = 1\text{L}$<br>$\nu / \text{MHz}$ | $I_{\text{rel}}$ | $F' - F''$ | $K = 1\text{U}$<br>$\nu / \text{MHz}$ | $I_{\text{rel}}$ | $F' - F''$ | $K = 2\text{L}$<br>$\nu / \text{MHz}$ | $I_{\text{rel}}$ | $F' - F''$ | $K = 2\text{U}$<br>$\nu / \text{MHz}$ | $I_{\text{rel}}$ |
|-------------------------------|---------------------------------|--------------------|------------|---------------------------------------|------------------|------------|---------------------------------------|------------------|------------|---------------------------------------|------------------|------------|---------------------------------------|------------------|
| <b><math>J = 1 - 0</math></b> |                                 |                    |            |                                       |                  |            |                                       |                  |            |                                       |                  |            |                                       |                  |
| 0 - 1                         | 8669.943                        | 0.1111             |            |                                       |                  |            |                                       |                  |            |                                       |                  |            |                                       |                  |
| 2 - 1                         | 8671.222                        | 0.5555             |            |                                       |                  |            |                                       |                  |            |                                       |                  |            |                                       |                  |
| 1 - 1                         | 8672.076                        | 0.3334             |            |                                       |                  |            |                                       |                  |            |                                       |                  |            |                                       |                  |
| <b><math>J = 2 - 1</math></b> |                                 |                    |            |                                       |                  |            |                                       |                  |            |                                       |                  |            |                                       |                  |
| 1 - 1                         | 17341.104                       | 0.0833             | 1 - 0      | 17189.333                             | 0.1111           | 1 - 0      | 17503.509                             | 0.1111           |            |                                       |                  |            |                                       |                  |
| 1 - 2                         | 17341.957                       | 0.0056             | 1 - 2      | 17189.916                             | 0.0056           | 1 - 2      | 17504.205                             | 0.0056           |            |                                       |                  |            |                                       |                  |
| 3 - 2                         | 17342.465                       | 0.4667             | 3 - 2      | 17190.192                             | 0.4667           | 3 - 2      | 17504.436                             | 0.4667           |            |                                       |                  |            |                                       |                  |
| 2 - 1                         | 17342.526                       | 0.2500             | 1 - 1      | 17190.305                             | 0.0833           | 1 - 1      | 17504.669                             | 0.0833           |            |                                       |                  |            |                                       |                  |
| 1 - 0                         | 17343.237                       | 0.1111             | 2 - 2      | 17190.690                             | 0.0833           | 2 - 2      | 17504.853                             | 0.0833           |            |                                       |                  |            |                                       |                  |
| 2 - 2                         | 17343.379                       | 0.0833             | 2 - 1      | 17191.079                             | 0.2500           | 2 - 1      | 17505.317                             | 0.2500           |            |                                       |                  |            |                                       |                  |
| <b><math>J = 3 - 2</math></b> |                                 |                    |            |                                       |                  |            |                                       |                  |            |                                       |                  |            |                                       |                  |
| 2 - 2                         | 26012.000                       | 0.0370             | 2 - 2      | 25784.511                             | 0.0370           | 2 - 2      | 26255.928                             | 0.0370           | 2 - 1      | 26037.145                             | 0.2000           | 2 - 1      | 26037.736                             | 0.2000           |
| 2 - 3                         | 26012.914                       | 0.0011             | 2 - 3      | 25785.008                             | 0.0011           | 2 - 3      | 26256.344                             | 0.0011           | 3 - 3      | 26037.653                             | 0.0370           | 3 - 3      | 26038.244                             | 0.0370           |
| 4 - 3                         | 26013.246                       | 0.4286             | 4 - 3      | 25785.272                             | 0.4286           | 2 - 1      | 26256.576                             | 0.2000           | 4 - 3      | 26037.653                             | 0.4286           | 4 - 3      | 26038.244                             | 0.4286           |
| 3 - 2                         | 26013.280                       | 0.2963             | 2 - 1      | 25785.285                             | 0.2000           | 4 - 3      | 26256.578                             | 0.4286           | 2 - 3      | 26037.653                             | 0.0011           | 2 - 3      | 26038.244                             | 0.0011           |
| 2 - 1                         | 26013.422                       | 0.2000             | 3 - 2      | 25785.527                             | 0.2963           | 3 - 2      | 26256.831                             | 0.2963           | 2 - 2      | 26038.567                             | 0.0370           | 3 - 2      | 26039.158                             | 0.2963           |
| 3 - 3                         | 26014.194                       | 0.0370             | 3 - 3      | 25786.025                             | 0.0370           | 3 - 3      | 26257.247                             | 0.0370           | 3 - 2      | 26038.567                             | 0.2963           | 2 - 2      | 26039.158                             | 0.0370           |
| <b><math>J = 4 - 3</math></b> |                                 |                    |            |                                       |                  |            |                                       |                  |            |                                       |                  |            |                                       |                  |
| 3 - 3                         | 34682.204                       | 0.0208             | 3 - 3      |                                       |                  | 3 - 4      | 35008.150                             | 0.0003           | 3 - 3      | 34716.569                             | 0.0208           | 3 - 3      | 34718.047                             | 0.0003           |
| 3 - 4                         | 34683.153                       | 0.0003             | 3 - 4      | 34379.823                             | 0.0003           | 3 - 4      | 35008.150                             | 0.0003           | 3 - 4      | 34716.569                             | 0.0003           | 3 - 4      | 34718.047                             | 0.0208           |
| 5 - 4                         | 34683.402                       | 0.4074             | 5 - 4      | 34380.045                             | 0.4074           | 5 - 4      | 35008.351                             | 0.4074           | 3 - 4      | 34716.569                             | 0.0003           | 3 - 4      | 34718.047                             | 0.0208           |
| 4 - 3                         | 34683.424                       | 0.3125             | 3 - 2      | 34380.086                             | 0.2381           | 3 - 2      | 35008.384                             | 0.2381           | 5 - 4      | 34716.669                             | 0.4074           | 5 - 4      | 34718.146                             | 0.4074           |
| 3 - 2                         | 34683.484                       | 0.2381             | 4 - 3      | 34380.160                             | 0.3125           | 4 - 3      | 35008.463                             | 0.3125           | 4 - 3      | 34717.057                             | 0.3125           | 4 - 3      | 34718.534                             | 0.0208           |
| 4 - 4                         | 34684.372                       | 0.0208             | 4 - 4      | 34380.912                             | 0.0208           | 4 - 4      | 35009.132                             | 0.0208           | 4 - 4      | 34717.057                             | 0.0208           | 4 - 4      | 34718.534                             | 0.3125           |
| <b><math>J = 5 - 4</math></b> |                                 |                    |            |                                       |                  |            |                                       |                  |            |                                       |                  |            |                                       |                  |
| 4 - 4                         | 43351.569                       | 0.0133             | 4 - 4      | 42973.421                             | 0.0133           | 4 - 4      | 43758.741                             | 0.0133           | 4 - 4      | 43394.804                             | 0.0133           | 4 - 4      | 43397.758                             | 0.0133           |
| 4 - 5                         | 43352.539                       | 0.0001             | 4 - 5      | 42974.288                             | 0.0001           | 4 - 5      | 43759.523                             | 0.0001           | 4 - 5      | 43395.192                             | 0.0001           | 4 - 5      | 43398.145                             | 0.0001           |
| 6 - 5                         | 43352.740                       | 0.3939             | 6 - 5      | 42974.477                             | 0.3939           | 6 - 5      | 43759.694                             | 0.3939           | 4 - 3      | 43395.292                             | 0.2593           | 4 - 3      | 43398.245                             | 0.2593           |
| 5 - 4                         | 43352.755                       | 0.3200             | 4 - 3      | 42974.511                             | 0.2593           | 4 - 3      | 43759.723                             | 0.2593           | 6 - 5      | 43395.312                             | 0.3939           | 6 - 5      | 43398.265                             | 0.3939           |
| 4 - 3                         | 43352.788                       | 0.2593             | 5 - 4      | 42974.540                             | 0.3200           | 5 - 4      | 43759.755                             | 0.3200           | 5 - 4      | 43395.515                             | 0.3200           | 5 - 4      | 43398.468                             | 0.3200           |
| 5 - 5                         | 43353.725                       | 0.0133             | 5 - 5      | 42975.407                             | 0.0133           | 5 - 5      | 43760.537                             | 0.0133           | 5 - 5      | 43395.903                             | 0.0133           | 5 - 5      | 43398.856                             | 0.0133           |
| <b><math>J = 6 - 5</math></b> |                                 |                    |            |                                       |                  |            |                                       |                  |            |                                       |                  |            |                                       |                  |
| 5 - 5                         | 52019.907                       | 0.0093             | 5 - 5      | 51567.406                             | 0.0093           | 5 - 5      | 52509.526                             | 0.0093           | 5 - 5      | 52072.829                             | 0.0093           | 5 - 5      | 52077.994                             | 0.0093           |
| 5 - 6                         | 52020.892                       | 0.0001             | 5 - 6      | 51568.335                             | 0.0001           | 5 - 6      | 52510.369                             | 0.0001           | 5 - 6      | 52073.419                             | 0.0001           | 5 - 6      | 52078.584                             | 0.0001           |
| 7 - 6                         | 52021.060                       | 0.3846             | 7 - 6      | 51568.499                             | 0.3846           | 7 - 6      | 52510.517                             | 0.3846           | 7 - 6      | 52073.539                             | 0.3846           | 7 - 6      | 52078.704                             | 0.3846           |
| 6 - 5                         | 52021.071                       | 0.3241             | 5 - 4      | 51568.525                             | 0.2727           | 5 - 4      | 52510.540                             | 0.2727           | 5 - 4      | 52073.540                             | 0.2727           | 5 - 4      | 52078.705                             | 0.2727           |
| 5 - 4                         | 52021.092                       | 0.2727             | 6 - 5      | 51568.538                             | 0.3241           | 6 - 5      | 52510.555                             | 0.3241           | 6 - 5      | 52073.660                             | 0.3241           | 6 - 5      | 52078.824                             | 0.3241           |
| 6 - 6                         | 52022.056                       | 0.0093             | 6 - 6      | 51569.467                             | 0.0093           | 6 - 6      | 52511.398                             | 0.0093           | 6 - 6      | 52074.250                             | 0.0093           | 6 - 6      | 52079.415                             | 0.0093           |
| <b><math>J = 7 - 6</math></b> |                                 |                    |            |                                       |                  |            |                                       |                  |            |                                       |                  |            |                                       |                  |
| 6 - 6                         | 60687.022                       | 0.0068             | 6 - 6      | 60160.922                             | 0.0068           | 6 - 6      | 61259.710                             | 0.0068           | 6 - 6      | 60750.459                             | 0.0068           | 6 - 6      | 60758.718                             | 0.0068           |
| 6 - 7                         | 60688.018                       | 0.0000             | 6 - 7      | 60161.890                             | 0.0000           | 6 - 7      | 61260.590                             | 0.0000           | 6 - 7      | 60751.170                             | 0.0000           | 6 - 7      | 60759.428                             | 0.0000           |
| 8 - 7                         | 60688.163                       | 0.3778             | 8 - 7      | 60162.034                             | 0.3778           | 8 - 7      | 61260.721                             | 0.3778           | 8 - 7      | 60751.284                             | 0.3778           | 8 - 7      | 60759.542                             | 0.3778           |
| 7 - 6                         | 60688.171                       | 0.3265             | 6 - 5      | 60162.054                             | 0.2820           | 6 - 5      | 61260.739                             | 0.2821           | 6 - 5      | 60751.290                             | 0.2821           | 6 - 5      | 60759.548                             | 0.2821           |
| 6 - 5                         | 60688.186                       | 0.2821             | 7 - 6      | 60162.060                             | 0.3265           | 7 - 6      | 61260.746                             | 0.3265           | 7 - 6      | 60751.361                             | 0.3265           | 7 - 6      | 60759.619                             | 0.3265           |
| 7 - 7                         | 60689.167                       | 0.0068             | 7 - 7      | 60163.028                             | 0.0068           | 7 - 7      | 61261.627                             | 0.0068           | 7 - 7      | 60752.072                             | 0.0068           | 7 - 7      | 60760.330                             | 0.0068           |
| <b><math>J = 8 - 7</math></b> |                                 |                    |            |                                       |                  |            |                                       |                  |            |                                       |                  |            |                                       |                  |
| 7 - 7                         | 69352.717                       | 0.0052             | 7 - 7      | 68753.883                             | 0.0052           | 7 - 7      | 70009.183                             | 0.0052           | 7 - 7      | 69427.576                             | 0.0052           | 7 - 7      | 69439.955                             | 0.0052           |
| 7 - 8                         | 69353.721                       | 0.0000             | 7 - 8      | 68754.877                             | 0.0000           | 7 - 8      | 70010.088                             | 0.0000           | 7 - 8      | 69428.365                             | 0.0000           | 7 - 8      | 69440.743                             | 0.0000           |
| 9 - 8                         | 69353.849                       | 0.3725             | 9 - 8      | 68755.005                             | 0.3725           | 9 - 8      | 70010.205                             | 0.3726           | 9 - 8      | 69428.471                             | 0.3726           | 9 - 8      | 69440.848                             | 0.3725           |
| 8 - 7                         | 69353.855                       | 0.3281             | 7 - 6      | 68755.021                             | 0.2889           | 7 - 6      | 70010.219                             | 0.2889           | 7 - 6      | 69428.479                             | 0.2889           | 7 - 6      | 69440.856                             | 0.2889           |
| 7 - 6                         | 69353.866                       | 0.2889             | 8 - 7      | 68755.024                             | 0.3281           | 8 - 7      | 70010.223                             | 0.3281           | 8 - 7      | 69428.524                             | 0.3281           | 8 - 7      | 69440.902                             | 0.3281           |
| 8 - 8                         | 69354.860                       | 0.0052             | 8 - 8      | 68756.018                             | 0.0052           | 8 - 8      | 70011.128                             | 0.0052           | 8 - 8      | 69429.313                             | 0.0052           | 8 - 8      | 69441.690                             | 0.0052           |
| <b><math>J = 9 - 8</math></b> |                                 |                    |            |                                       |                  |            |                                       |                  |            |                                       |                  |            |                                       |                  |
| 8 - 8                         | 78016.793                       | 0.0041             | 8 - 8      | 77346.206                             | 0.0041           | 8 - 8      | 78757.837                             | 0.0041           | 8 - 8      | 78104.085                             | 0.0041           | 8 - 8      | 78121.752                             | 0.0041           |
| 8 - 9                         | 78017.805                       | 0.0000             | 8 - 9      | 77347.220                             | 0.0000           | 8 - 9      | 78758.761                             | 0.0000           | 8 - 9      | 78104.927                             | 0.0000           | 8 - 9      | 78122.593                             | 0.0000           |
| 10 - 9                        | 78017.918                       | 0.3684             | 10 - 9     | 77347.334                             | 0.3684           | 10 - 9     | 78758.866                             | 0.3684           | 10 - 9     | 78105.026                             | 0.3684           | 10 - 9     | 78122.692                             | 0.3685           |
| 8 - 7                         | 78017.924                       | 0.3292             | 8 - 7      | 77347.347                             | 0.2941           | 8 - 7      | 78758.877                             | 0.2941           | 8 - 7      | 78105.033                             | 0.2941           | 8 - 7      | 78122.699                             | 0.2941           |
| 9 - 8                         | 78017.932                       | 0.2941             | 9 - 8      | 77347.348                             | 0.3292           | 9 - 8      | 78758.879                             | 0.3292           | 9 - 8      | 78105.064                             | 0.3292           | 9 - 8      | 78122.730                             | 0.3292           |
| 9 - 9                         | 78018.935                       | 0.0041             | 9 - 9      | 77348.361                             | 0.0041           | 9 - 9      | 78759.803                             | 0.0041           | 9 - 9      | 78105.906                             | 0.0041           | 9 - 9      | 78123.571                             | 0.0041           |

**Notes.**

<sup>(a)</sup>Calculated frequency with uncertainty estimated at 5 kHz.

<sup>(b)</sup>Relative intensity of a given hyperfine component such that the sum over all components for this rotational transition is unity.

## Appendix B: Astrophysical methods

### Appendix B.1: The Orion BN/KL region

Orion BN/KL (Becklin-Neugebauer/Kleinmann-Low; Becklin & Neugebauer 1967; Kleinmann & Low 1967) is the closest (about 414 pc; Menten et al. 2007) region exhibiting several processes related to young stellar objects (YSOs) and high-mass star formation (Genzel & Stutzki 1989). This region is located at the core of the Orion molecular cloud 1 (OMC1) which lies behind the Orion Nebula cluster (O’Dell 2001). Infrared facilities and radio telescopes can observe inside dusty regions where the formation of stars or their associated violent phenomena take place, providing very useful information about these processes. Near- and mid-IR subarcsecond resolution imaging and (sub)millimetre interferometric observations have identified the main sources of luminosity, heating, and dynamics in the region. At first, IRc2 was proposed as the main source of luminosity, heating, and dynamics within the region (Wynn-Williams et al. 1984). However, the detection of two radio continuum sources, *B* (coincident with the *BN* object which was resolved with high spatial resolution at 7 mm; Rodríguez et al. 2009) and *I* (centroid of the SiO masers and located 0.5'' south of IRc2; Menten & Reid 1995) revealed that the intrinsic IR luminosity of IRc2 ( $L \sim 1000L_{\odot}$ ) is only a fraction of the luminosity of the entire system ( $1 \times 10^5 L_{\odot}$ ; Gezari et al. 1998). The radio continuum emission of the IR source *n* was also identified by Menten & Reid (1995) (3'' south-west from source *I*), suggesting this source as another precursor of the large-scale phenomena. In addition, several IR and millimetre continuum sources have been identified (Shuping et al. 2004; Wu et al. 2014). Thus, the core of Orion KL contains at least three self-luminous objects (protostars), the compact HII regions *I*, *n* (see Figs. 3 and B.3), and *BN*; these sources are within a region of  $\sim 10''$  ( $\sim 0.02$  pc). Their proper motions reveal that they run away from a common region (Gómez et al. 2005). Different scenarios, as well as the formation of high-mass stars, have been proposed to explain the complexity of this source. An explosion of a multistar system (sources *I*, *n*, and *BN*) that took place  $\sim 500$  years ago has been proposed as the main factor responsible for most of the Orion KL gas components (Zapata et al. 2011).

The different gas components show distinct physical and chemical properties, which can be identified even with single-dish telescopes by a characteristic systemic velocity (Blake et al. 1987; Schilke et al. 2001; Tercero et al. 2010). Classically, these components have been called *Hot Core*, a hot,  $\sim 200$ - $300$  K, and dense clump rich in complex organic saturated N-bearing species such as  $\text{CH}_3\text{CH}_2\text{CN}$ , characterized by  $\Delta v_{FWHM} \sim 5$ - $15$  km s $^{-1}$  and  $v_{LSR} \sim 5$ - $7$  km s $^{-1}$ ; *Extended Ridge*, the host, quiescent, and relatively cold,  $\sim 60$  K ambient cloud rich in simple species such as CS or HCN, emitting lines with  $\Delta v_{FWHM} \sim 3$ - $4$  km s $^{-1}$  and  $v_{LSR} \sim 8$ - $9$  km s $^{-1}$ ; *Compact Ridge*, a warm,  $\sim 150$  K, and compact clump rich in organic saturated O-rich species such as  $\text{CH}_3\text{OCOH}$  or  $\text{CH}_3\text{OCH}_3$ , whose spectral features are characterized by  $\Delta v_{FWHM} \sim 2$ - $3$  km s $^{-1}$  and  $v_{LSR} \sim 7$ - $8$  km s $^{-1}$ ; and *Plateau*, molecular outflows presenting typical shock chemistry with molecules such as SO or SiO (Goicoechea et al. 2015); the low velocity flow (oriented along the SW-NE direction and probably driven by source *I*) is characterized by lines with  $\Delta v_{FWHM} \sim 20$  km s $^{-1}$  and  $v_{LSR} \sim 5$ - $6$  km s $^{-1}$ , whereas the high-velocity flow (oriented along the SE-NW direction and whose origin could be the explosive event caused by the dynamical decay of a multi-star system briefly described above) presents lines with  $\Delta v_{FWHM}$  as wide as  $150$  km s $^{-1}$  and  $v_{LSR} \sim 10$  km s $^{-1}$ . Interferometric observations have shown other cloud compo-

nents inside Orion BN/KL such as the millimetre continuum sources MM2, MM4 (which corresponds approximately to Position B, see Figs. 3 and B.3), MM5, and MM6 (Wu et al. 2014). In addition, these latter observations reveal the hot core to be a collection of very dense and hot clumps presenting different chemistry and radial velocities (Favre et al. 2011; Tercero et al. 2015). Position A of Figs. 3 and B.3 is located in the middle of the hot core clumpy structure.

### Appendix B.2: Observations

#### Appendix B.2.1: IRAM 30m

We performed a sensitive, fully single side band reduced, line survey towards Orion IRc2 with the IRAM 30m telescope over broad frequency ranges (total frequency coverage of  $\sim 168$  GHz; Tercero et al. 2010). Our main goal was to obtain a deep insight into the molecular content and chemistry of Orion BN/KL and to improve our knowledge of its prevailing physical conditions. It also allows us to search for new molecular species and new isotopologues, as well as the rotational emission of vibrationally excited states of molecules already known to exist in this source (see Sect. B.3 and main text).

The line survey was performed over three millimetre-wave windows (3, 2, and 1.3 mm, covering frequency ranges 80–115.5 GHz, 130–178 GHz, and 197–281 GHz, respectively) with the IRAM 30m telescope. The observations were carried out between September 2004 and January 2007 pointing toward the IRc2 source at  $\alpha_{2000.0} = 5^h 35^m 14^s.5$ ,  $\delta_{2000.0} = -5^{\circ} 22' 30''.0$ . Four SiS receivers were used simultaneously, with image sideband rejections within  $\sim 13$  dB (1.3 mm receivers), 12–16 dB (2 mm receivers), and 20–27 dB (3 mm receivers). The observations were performed using the wobbler switching mode with a beam throw in azimuth of  $\pm 120''$ . No contamination from the off position affected our observations, except for a marginal amount at the lowest elevations ( $25^{\circ}$ ) for molecules showing low-*J* emission along the ambient molecular cloud. System temperatures were in the range of 100–800 K from the lowest to the highest frequencies. For the spectra between 172–178 GHz, the system temperature was significantly higher, 1000–4000 K, owing to proximity of the atmospheric water line at 183.31 GHz. The intensity scale was calibrated using the atmospheric transmission model (ATM; Pardo et al. 2001; Cernicharo 1985). Focus and pointing were checked every 1–2 hours on planets or nearby quasars. Backends provided a spectral resolution of 1–1.25 MHz. The half power beam width (HPBW) of the 30m telescope ranged from 31'' to 9'' from 80 to 280 GHz (HPBW[arcsec]=2460/Freq.[GHz]). The data were reduced using the GILDAS package<sup>1</sup> checking for image sideband contamination and fitting and removing 0–1 order baselines. Figures using these data are shown in main beam temperature ( $T_{MB}$ ).

#### Appendix B.2.2: ALMA SV

The ALMA Science Verification (SV) data were taken in January 2012 towards the IRc2 region in Orion. The observations were carried out with 16 antennas of 12 m in the frequency range from 213.715 to 246.627 GHz (Band 6). The primary beam was  $\sim 27''$ . Spectral resolution was 0.488 MHz ( $\sim 0.64$  km s $^{-1}$  in the observed frequency range). The observations were centred on coordinates:  $\alpha_{J2000} = 05^h 35^m 14^s.35$ ,  $\delta_{J2000} = -05^{\circ} 22' 35''.00$ . The

<sup>1</sup> <http://www.iram.fr/IRAMFR/GILDAS>

CASA software<sup>2</sup> was used for initial processing, and then the visibilities were exported to the GILDAS package for further analysis. The synthesized beam ranged from  $2''.00 \times 1''.48$  with a PA of  $176^\circ$  at 214.0 GHz to  $1''.75 \times 1''.29$  with a PA of  $164^\circ$  at 246.4 GHz. The brightness temperature to flux density conversion factor is 9 K for 1 Jy per beam. The continuum emission was subtracted in the maps by carefully selecting line-free channels.

### Appendix B.3: Astronomical model

#### Appendix B.3.1: Orion KL

Frequency predictions and intensities reported in this work were implemented in MADEX (Cernicharo 2012) to model the emission of  $\text{CH}_3\text{NCO}$  and to search for it toward Orion KL. MADEX is an excitation and radiative transfer code which includes more than 5200 molecular species with accurate spectroscopy. To derive the physical parameters shown in Table B.1, we performed a model that reproduces more line profiles more accurately from transitions covering a wide energy range within a  $\sim 30\%$  of the uncertainty in line intensity (red lines in Figs. 2 and B.1).

Owing to the lack of collisional rates for this molecule, we used LTE approximation. Nevertheless, taking into account the physical conditions of the considered components of the cloud (see Table B.2), we expect that this approximation works reasonably well (see e.g. Fortman et al. 2012). For each spectral component, we assume uniform physical conditions of the cloud (line width, radial velocity, and source size with uniform brightness temperature and optical depth over this size), which we choose by taking into account the parameters obtained from Gaussian fits of the line profiles and the emission shown by the ALMA maps. To fit the IRAM 30m lines, we also considered the beam coupling effects adding the offset position with respect to IRc2 (the pointing position). Corrections for beam dilution are also applied for each line depending on the different beam sizes at different frequencies. Therefore, we fixed all of the above parameters leaving only the rotational temperature and the column density as free parameters for each component. In order to determine the uncertainty of the values of column density and of temperature, we ran several models varying only the values for these parameters and fixing the rest. To fit the ALMA data we extracted the averaged spectrum over  $5 \times 5$  pixels ( $\sim 1'' \times 1''$ ) around Position A and Position B (see Figs. 3 and B.3). To derive the column densities and relative abundances of the species shown in Table B.1, we adopted the same model of  $\text{CH}_3\text{NCO}$  for each position varying the column density for each one of the species of Table B.1. In Fig. B.1, a model containing all species already studied in the IRAM 30m survey is included (cyan line). The molecules considered in the models and references to their modelling and analysis are given in Table B.3. This table also summarizes the works performed to date based on the 30m data and devoted to mitigating the number of unidentified lines in the IRAM 30m survey of Orion (especially those in collaboration with spectroscopy laboratories), to searching for new molecular species in interstellar clouds, and to improving the knowledge of the physical-chemical properties of Orion KL.

#### Appendix B.3.2: Sgr B2(N)

We have searched in published line surveys of Sgr B2 and W51 for  $\text{CH}_3\text{NCO}$ . We find that 21 unidentified features above  $13\sigma$

found in Sgr B2 by Belloche et al. (2013) can be unambiguously assigned to  $\text{CH}_3\text{NCO}$ . However, in the PRIMOS data (Neill et al. 2012) of the same source the assignment is not obvious.  $\text{CH}_3\text{NCO}$  was also reported in Sgr B2 during the submission process of this work (Halfen et al. 2015). We used MADEX and the public data of Sgr B2(N) provided by Belloche et al. (2013) to derive the rotational temperature and column density of methyl isocyanate in this source (see Fig. B.2, red line). We find that the two hot ( $T_{\text{rot}} = 200$  K) and compact ( $d_{\text{sou}} \approx 2''$ ) components derived by Belloche et al. (2013) for HNC0 are enough to reproduce all lines that appear at 3 mm. We derive column densities of  $N = 5 \times 10^{17} \text{ cm}^{-2}$  for the  $63 \text{ km s}^{-1}$  component and  $3 \times 10^{17} \text{ cm}^{-2}$  for the second component at  $73 \text{ km s}^{-1}$  (assuming  $\Delta v_{\text{FWHM}} = 7 \text{ km s}^{-1}$ , see Belloche et al. 2013).

In W51 (Pulliam et al. 2012), another well-known hot core with similar molecular content than Orion, we do not find an obvious detection in the data, because the lines are weaker owing to the higher distance of W51 compared to Orion.

Methyl isocyanate turns out to be one of the prominent molecules in hot cores and it is surprising to realize that it is present in many line surveys. It was only the lack of suitable laboratory data delayed its discovery. In the present work it is the close collaboration between astronomers and molecular physicists that has made such detailed characterization of this new molecular species possible.

#### Appendix B.4: Spatial distribution in Orion

The spatial distribution of several molecules detected in Orion KL is shown in Figs. 3 and B.3. Despite the lack of short spacing data required for completion of the possible extended emission of some of these species (see e.g.  $\text{CH}_3\text{OH}$  or DCN), we can obtain an overview of the main cores that host these species. Moreover, the discussion has to address the large differences in energies of the upper level for the transitions involved in those maps (it is not possible to find transitions with similar energies of, for instance, DCN and  $\text{HC}_3\text{N } v_7=1$  between 213.7–247.5 GHz, the coverage of the ALMA SV data). In addition, owing to the extreme complexity of Orion KL, it is not straightforward to find lines free of blending with other species in the whole region: many lines of a large variety of molecules that appear unblended in some cores, overlap with lines of other species in the average spectrum of the region. This makes it more difficult to derive maps of lines involving transitions with uniform upper level energies. Nevertheless, by taking these restrictions into account, the discussion can be focused on the main differences/similarities found for the different “families” of molecules.

As we have pointed out in the main text, we note a similar spatial distribution for  $\text{CH}_3\text{NCO}$ ,  $\text{NH}_2\text{CHO}$ , and HNC0. The main differences of these maps are a larger extension of HNC0 due to its higher abundance and the lack of the clump in the NW of position B for  $\text{NH}_2\text{CHO}$ ; in addition,  $\text{CH}_3\text{NCO}$  does not emit in this region, whereas HNC0 and  $\text{NH}_2\text{CHO}$  show some emission at the position of the compact ridge. It is worth noting that these species are the only three detected in Orion KL containing Nitrogen, Oxygen, Carbon, and Hydrogen together.

Following with the compact ridge, this component is the main host of  $\text{CH}_3\text{OCH}_3$ ,  $\text{CH}_3\text{COOH}$ , and  $\text{CH}_2\text{OCH}_2$ , all of them organic compounds containing oxygen. Molecules that we could naively think that are related with them, such as  $\text{CH}_3\text{CH}_2\text{OH}$ ,  $\text{CH}_3\text{COCH}_3$ ,  $\text{CH}_3\text{COOH}$ ,  $\text{OHCH}_2\text{CH}_2\text{OH}$ , and  $\text{CH}_2\text{OHCHO}$ , present a completely different spatial distribution (Guélin et al. 2008; Peng et al. 2012, 2013; Widicus Weaver & Friedel 2012; Friedel & Widicus Weaver 2012; Brouillet et al. 2015; Feng et

<sup>2</sup> <http://casa.nrao.edu>

**Table B.1.** Molecular abundances in Orion and in Comet 67P/Churyumov-Gerasimenko

| Species                                                      | Comet                                 | Orion Position A                      |                                                 | Orion Position B                      |                                                 |
|--------------------------------------------------------------|---------------------------------------|---------------------------------------|-------------------------------------------------|---------------------------------------|-------------------------------------------------|
|                                                              | Abundance<br>rel. to H <sub>2</sub> O | Column<br>density (cm <sup>-2</sup> ) | Abundance<br>rel. to H <sub>2</sub> O<br>(×100) | Column<br>density (cm <sup>-2</sup> ) | Abundance<br>rel. to H <sub>2</sub> O<br>(×100) |
| H <sub>2</sub> O <sup>a</sup>                                | 100                                   | (3 ± 1)×10 <sup>19</sup>              | 100                                             | (2.0 ± 0.6)×10 <sup>19</sup>          | 100                                             |
| HCN <sup>a</sup>                                             | 0.9                                   | (4 ± 1)×10 <sup>17</sup>              | 1.3                                             | (2.0 ± 0.6)×10 <sup>17</sup>          | 1.0                                             |
| CO <sup>b</sup>                                              | 1.2                                   | (4 ± 1)×10 <sup>19</sup>              | 130                                             | (1.0 ± 0.3)×10 <sup>19</sup>          | 50                                              |
| CH <sub>3</sub> NH <sub>2</sub>                              | 0.6                                   | ≤(4 ± 1)×10 <sup>15</sup>             | ≤0.01                                           | (4 ± 1)×10 <sup>15</sup>              | 0.02                                            |
| CH <sub>3</sub> CN <sup>c</sup>                              | 0.3                                   | (7 ± 3)×10 <sup>16</sup>              | 0.2                                             | (1.0 ± 0.3)×10 <sup>17</sup>          | 0.5                                             |
| HNCO                                                         | 0.3                                   | (1.0 ± 0.3)×10 <sup>17</sup>          | 0.3                                             | (7 ± 3)×10 <sup>16</sup>              | 0.35                                            |
| CH <sub>3</sub> CHO                                          | 0.5                                   | (1.6 ± 0.5)×10 <sup>15</sup>          | 0.005                                           | (1.4 ± 0.3)×10 <sup>15</sup>          | 0.0075                                          |
| HCONH <sub>2</sub>                                           | 1.8                                   | (4 ± 1)×10 <sup>15</sup>              | 0.01                                            | (7 ± 3)×10 <sup>14</sup>              | 0.0035                                          |
| CH <sub>3</sub> CH <sub>2</sub> NH <sub>2</sub> <sup>d</sup> | 0.3                                   | ≤(4 ± 1)×10 <sup>14</sup>             | ≤0.001                                          | ≤(2 ± 1)×10 <sup>14</sup>             | ≤0.001                                          |
| <b>CH<sub>3</sub>NCO</b>                                     | <b>1.3</b>                            | <b>(7 ± 3)×10<sup>15</sup></b>        | <b>0.02</b>                                     | <b>(4 ± 1)×10<sup>15</sup></b>        | <b>0.02</b>                                     |
| CH <sub>3</sub> COCH <sub>3</sub>                            | 0.3                                   | (1.4 ± 0.4)×10 <sup>16</sup>          | 0.04                                            | (1.1 ± 0.3)×10 <sup>16</sup>          | 0.055                                           |
| CH <sub>3</sub> CH <sub>2</sub> CHO <sup>d</sup>             | 0.1                                   | ≤(1.0 ± 0.3)×10 <sup>15</sup>         | ≤0.003                                          | ≤(1.0 ± 0.3)×10 <sup>15</sup>         | ≤0.005                                          |
| CH <sub>3</sub> CONH <sub>2</sub>                            | 0.7                                   | (1.2 ± 0.4)×10 <sup>15</sup>          | 0.004                                           | ≤(3 ± 1)×10 <sup>14</sup>             | ≤0.0015                                         |
| CH <sub>2</sub> OHCHO                                        | 0.4                                   | (7 ± 3)×10 <sup>14</sup>              | 0.002                                           | ≤(4 ± 1)×10 <sup>14</sup>             | ≤0.002                                          |
| OHCH <sub>2</sub> CH <sub>2</sub> OH                         | 0.2                                   | (9 ± 3)×10 <sup>15</sup>              | 0.03                                            | ≤(1.0 ± 0.3)×10 <sup>15</sup>         | ≤0.005                                          |
| CH <sub>3</sub> OH                                           |                                       | (3 ± 1)×10 <sup>18</sup>              | 10                                              | (9 ± 3)×10 <sup>17</sup>              | 4.5                                             |
| CH <sub>3</sub> COOH                                         |                                       | (9 ± 3)×10 <sup>16</sup>              | 0.3                                             | (6 ± 2)×10 <sup>16</sup>              | 0.3                                             |
| CH <sub>3</sub> COOH                                         |                                       | (1.0 ± 0.3)×10 <sup>16</sup>          | 0.03                                            | ≤(3 ± 1)×10 <sup>15</sup>             | ≤0.015                                          |
| CH <sub>3</sub> CH <sub>2</sub> CN                           |                                       | (3 ± 1)×10 <sup>16</sup>              | 0.1                                             | (3 ± 1)×10 <sup>16</sup>              | 0.15                                            |

(a): [D]/[H] = 0.003; from [HDO]/[H<sub>2</sub>O] (Neill et al. 2013). (b): [<sup>16</sup>O]/[<sup>18</sup>O] = 250; from [<sup>16</sup>OCS]/[<sup>18</sup>OCS] (Tercero et al. 2010). (c): [<sup>12</sup>C]/[<sup>13</sup>C] = 45 (Tercero et al. 2010). (d): Only the lowest energy conformer, *trans* for CH<sub>3</sub>CH<sub>2</sub>NH<sub>2</sub> and *cis* for CH<sub>3</sub>CH<sub>2</sub>CHO.

**Table B.2.** Physical parameters of the considered Orion KL cores

|                                                | IRAM 30m                 | ALMA SV                  |                              |                              |                              |
|------------------------------------------------|--------------------------|--------------------------|------------------------------|------------------------------|------------------------------|
|                                                |                          | Position A               |                              | Position B                   |                              |
|                                                |                          | Comp. 1                  | Comp. 2                      | Comp. 1                      | Comp. 2                      |
| $v_{\text{LSR}}$ (km s <sup>-1</sup> )         | 7                        | 8                        | 6                            | 8                            | 5                            |
| $\Delta v_{\text{FWHM}}$ (km s <sup>-1</sup> ) | 5                        | 3                        | 8                            | 3                            | 3                            |
| $d_{\text{sou}}$ (")                           | 8                        | 3                        | 3                            | 3                            | 3                            |
| <i>offset</i> (")                              | 5                        | ...                      | ...                          | ...                          | ...                          |
| $T_{\text{rot}}$ (K)                           | 150±50                   | 150±50                   | 150±50                       | 150±50                       | 150±50                       |
| $N(\text{CH}_3\text{NCO})$ (cm <sup>-2</sup> ) | (5 ± 2)×10 <sup>15</sup> | (5 ± 2)×10 <sup>15</sup> | (2.5 ± 0.7)×10 <sup>15</sup> | (2.5 ± 0.7)×10 <sup>15</sup> | (1.7 ± 0.5)×10 <sup>15</sup> |

al. 2015; Tercero et al. 2015). Although there are some remarkable differences in the emission of the latter species, we observe the main core located at the SE of source *n* (at the middle-south of the hot core). Abundant species in the region such as DCN, HDO, and CH<sub>3</sub>CN do not show significant emission at the compact ridge.

On the other hand, complex species with nitrogen such as CH<sub>3</sub>CH<sub>2</sub>CN, CH<sub>2</sub>CHCN, and HC<sub>3</sub>N, present their emission at the north of the hot core. In addition, emission at the NE of source *I* is more prominent for these species (Guélin et al. 2008; Widicus Weaver & Friedel 2012; Friedel & Widicus Weaver 2012).

Finally, although we do not discuss the emission peaks of CH<sub>3</sub>OH (methanol, one of the most abundant species), because they could be affected by opacity effects, we note that methanol is ubiquitous in the region.

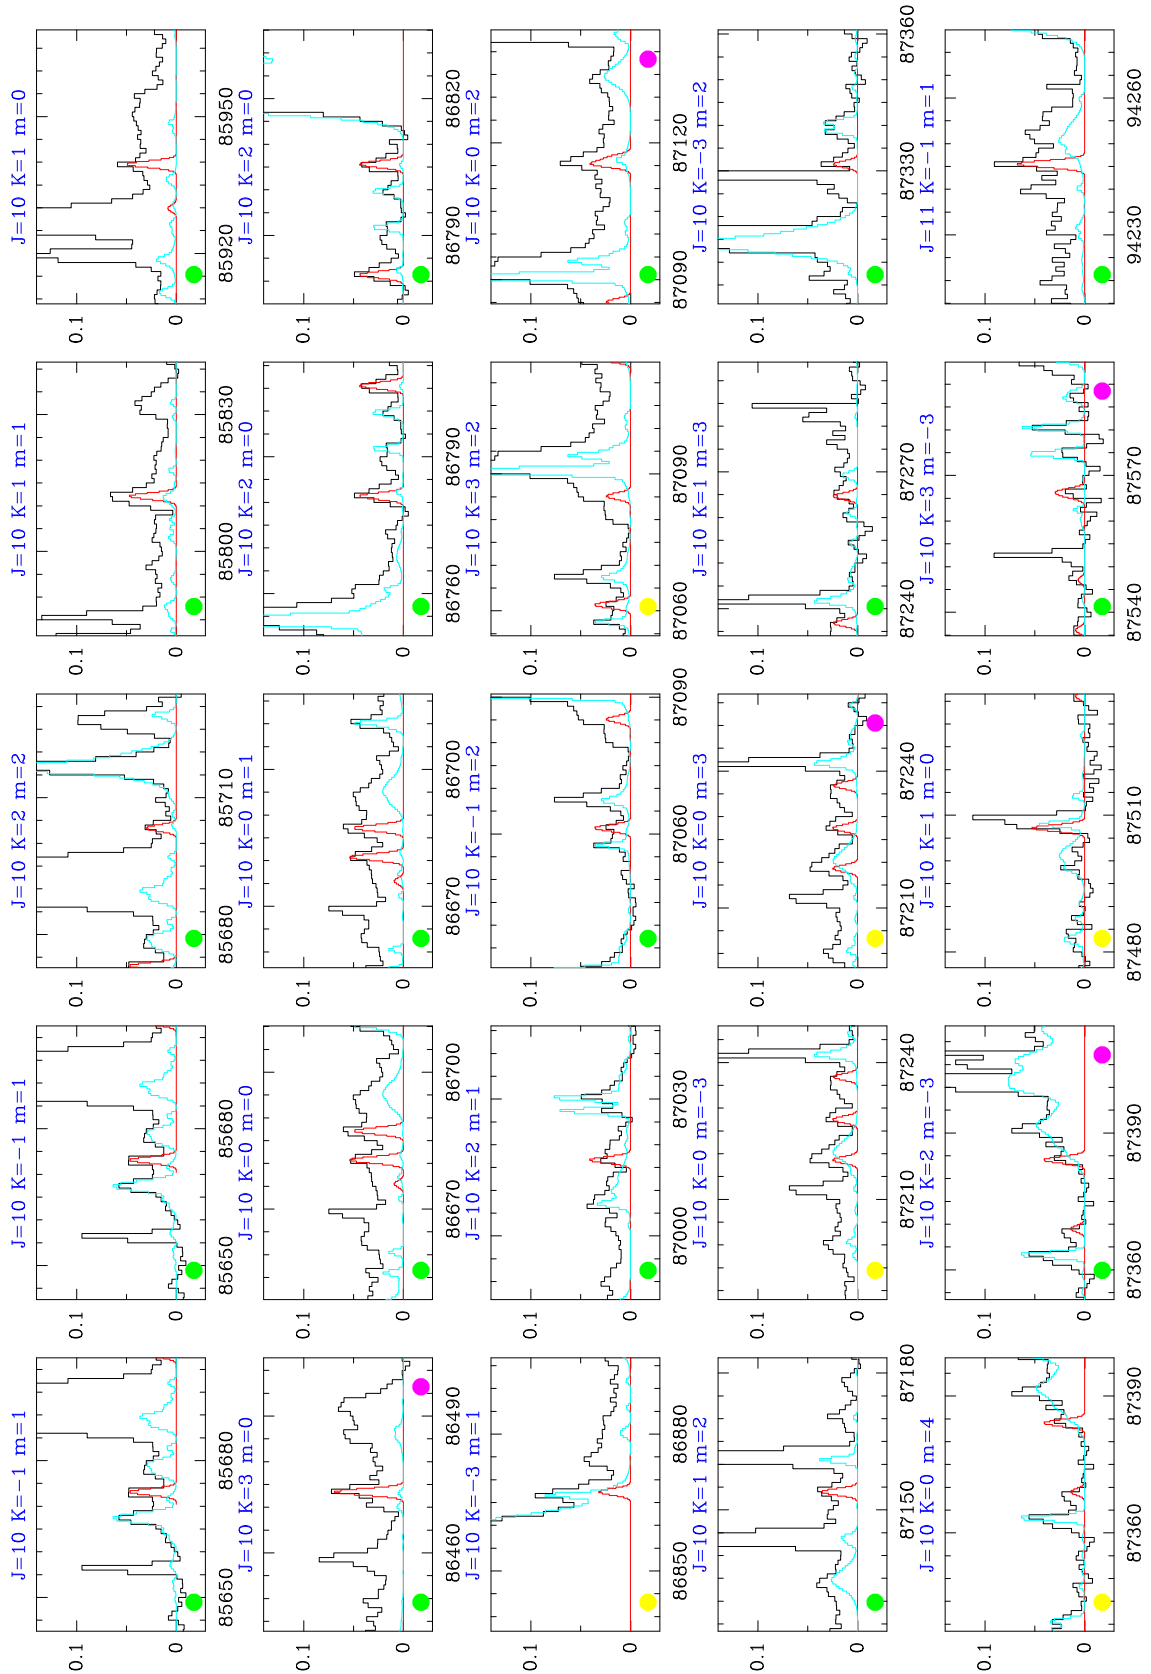

**Fig. B.1.** Lines of  $\text{CH}_3\text{NCO}$  (here and the next 15 plots) observed with the IRAM 30m telescope and with ALMA (black filled circle in the middle bottom of each panel). The lines are ordered by frequency. The red lines correspond to the  $\text{CH}_3\text{NCO}$  model simulation for both sets of data (see text). The cyan lines correspond to the emission of all modelled molecules to date for the 30m data (see Table B.3). Green filled circles at the bottom left of each panel identify unblended lines, while yellow ones mark lines blended with similar intensity lines from other species. Nevertheless, in the latter case each line profile can be still fitted with a Gaussian profile providing a frequency and intensity for the observed component. Violet filled circles at the bottom right of each panel identify unresolved doublets. The quantum numbers follow the labelling of Table A.5 except for  $m=0$  for which  $K_c$  is not provided (many of these lines are unresolved doublets). The complete set of quantum numbers for  $m=0$  is provided in Table A.6. The units for the intensity scale are Jy/beam for the ALMA data and main beam antenna temperature for the IRAM 30m telescope. A  $v_{\text{LSR}}$  of  $+9.0 \text{ km s}^{-1}$  is assumed.

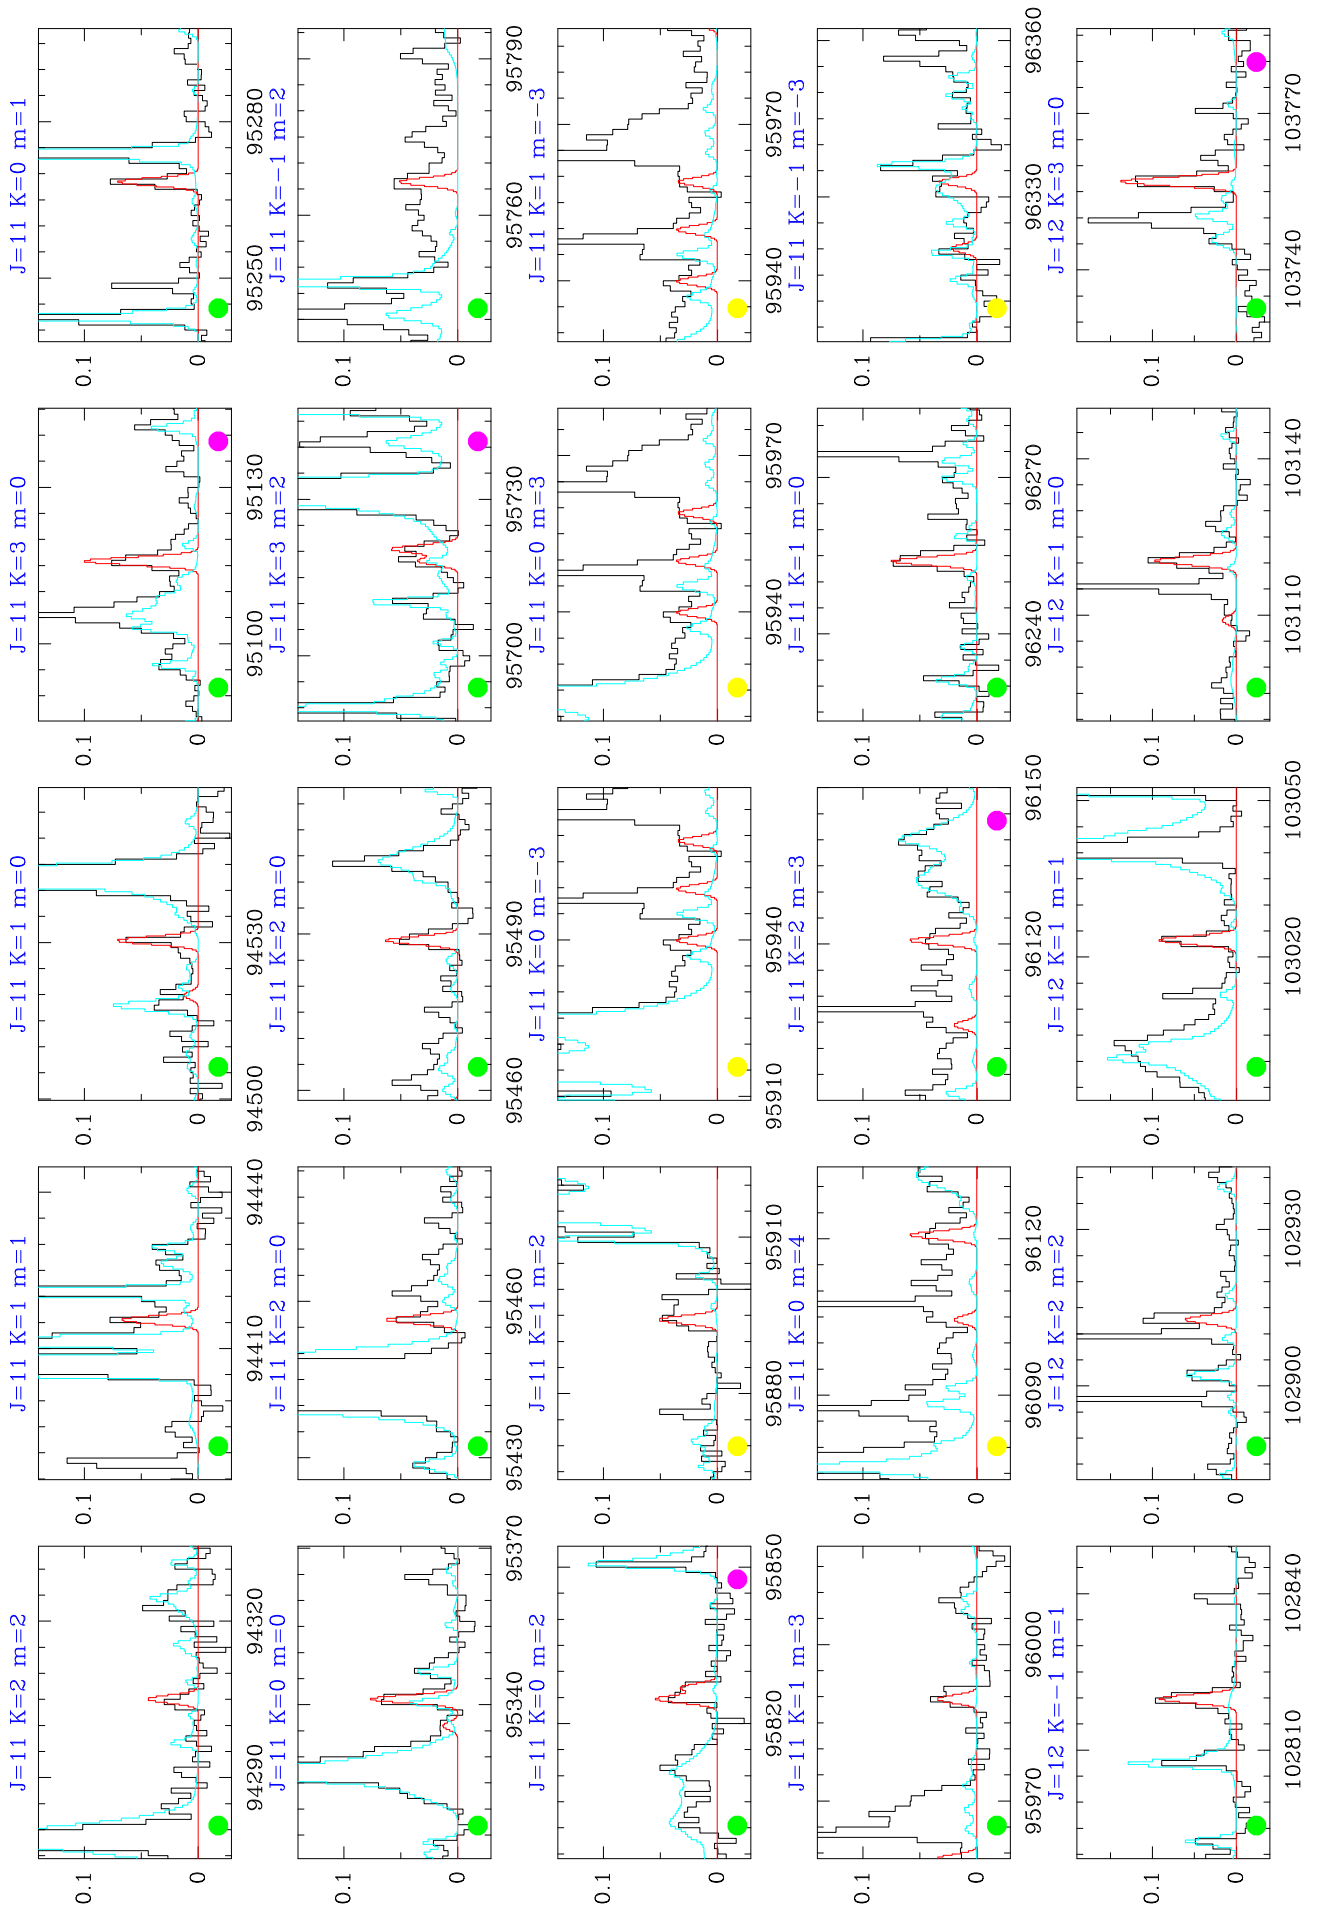



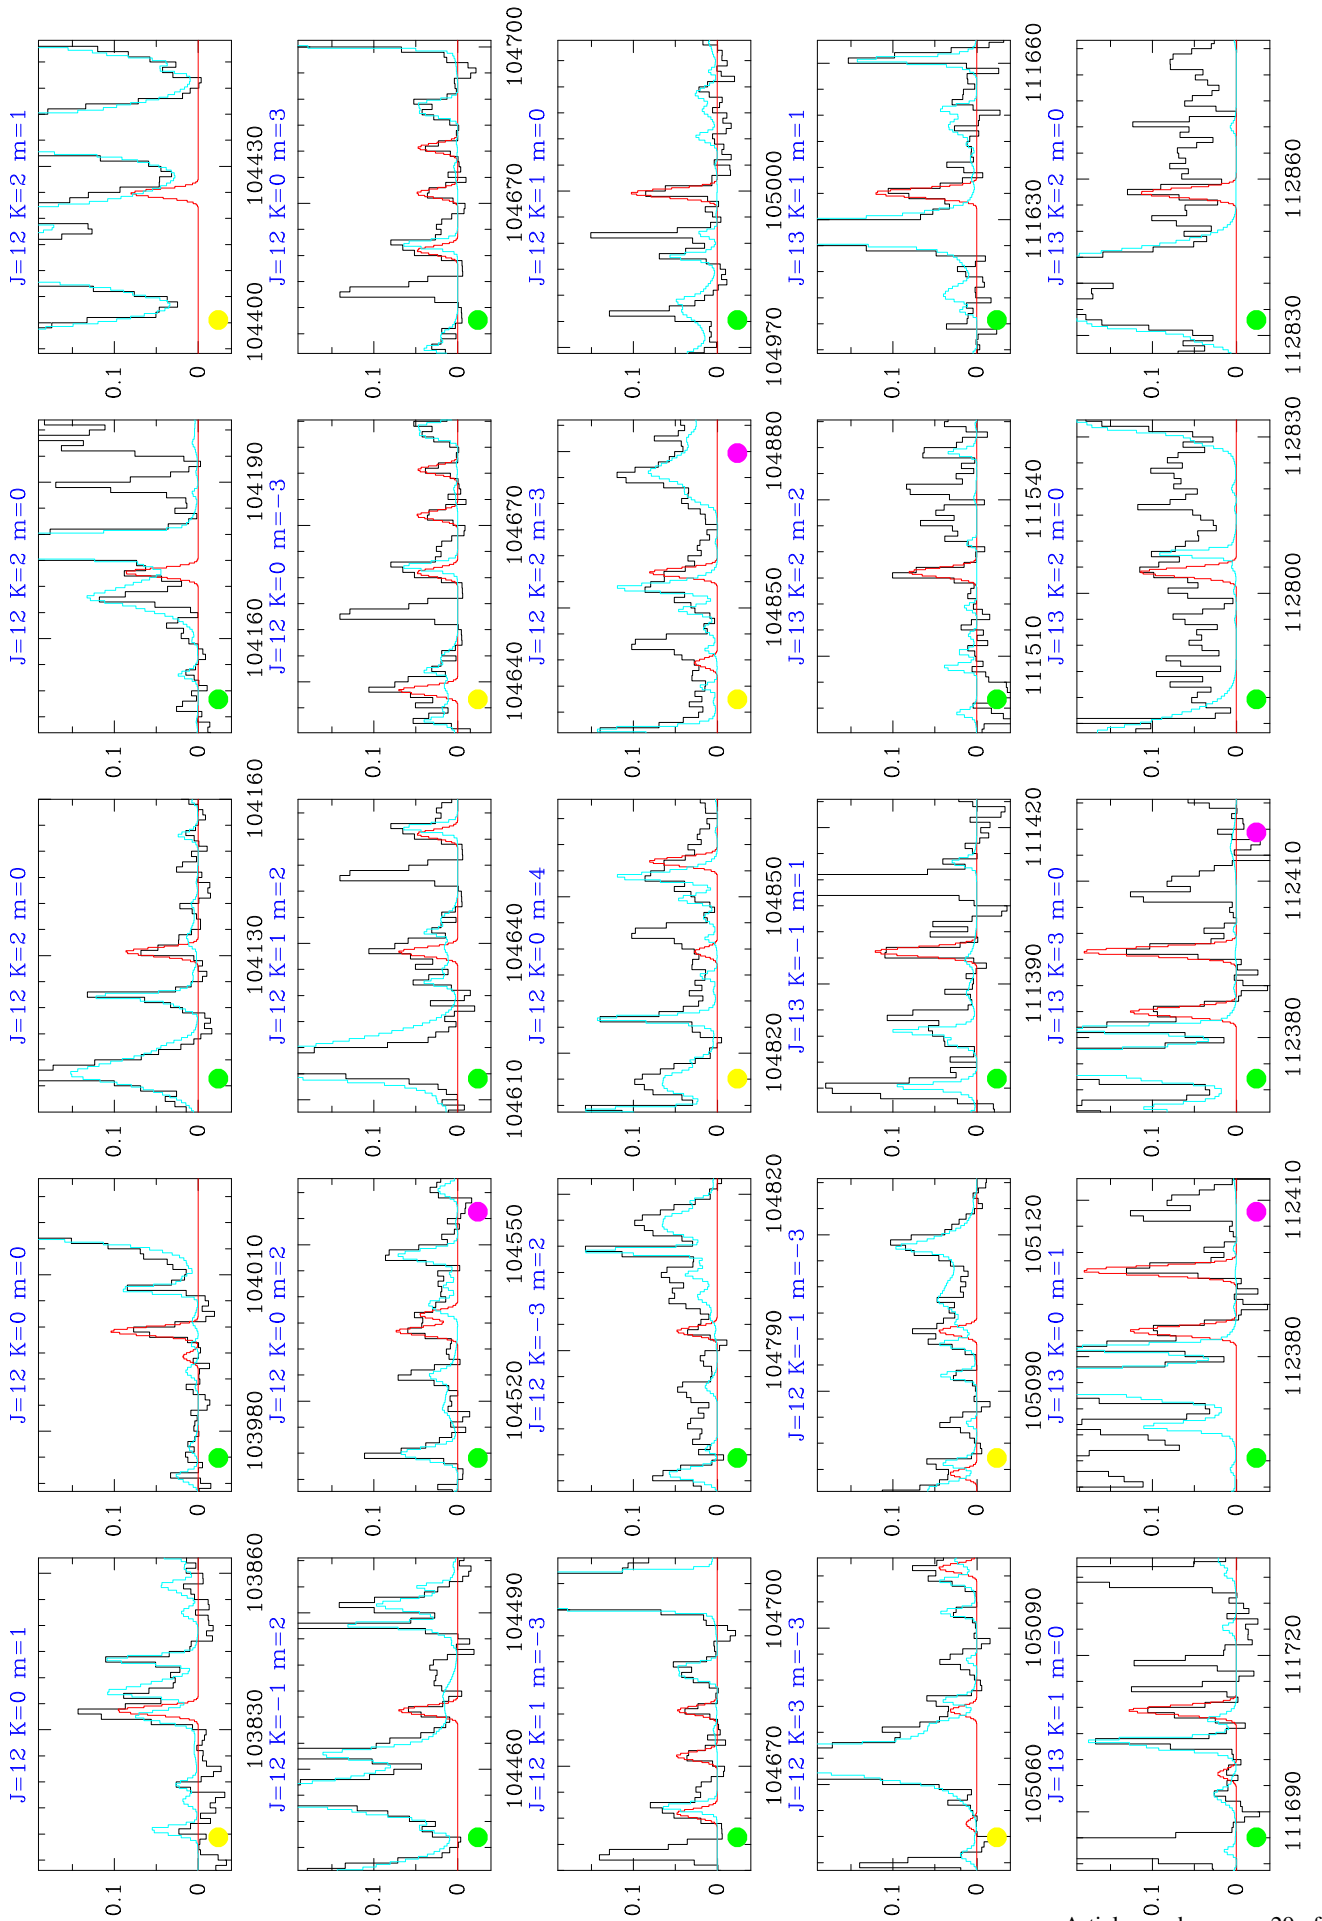

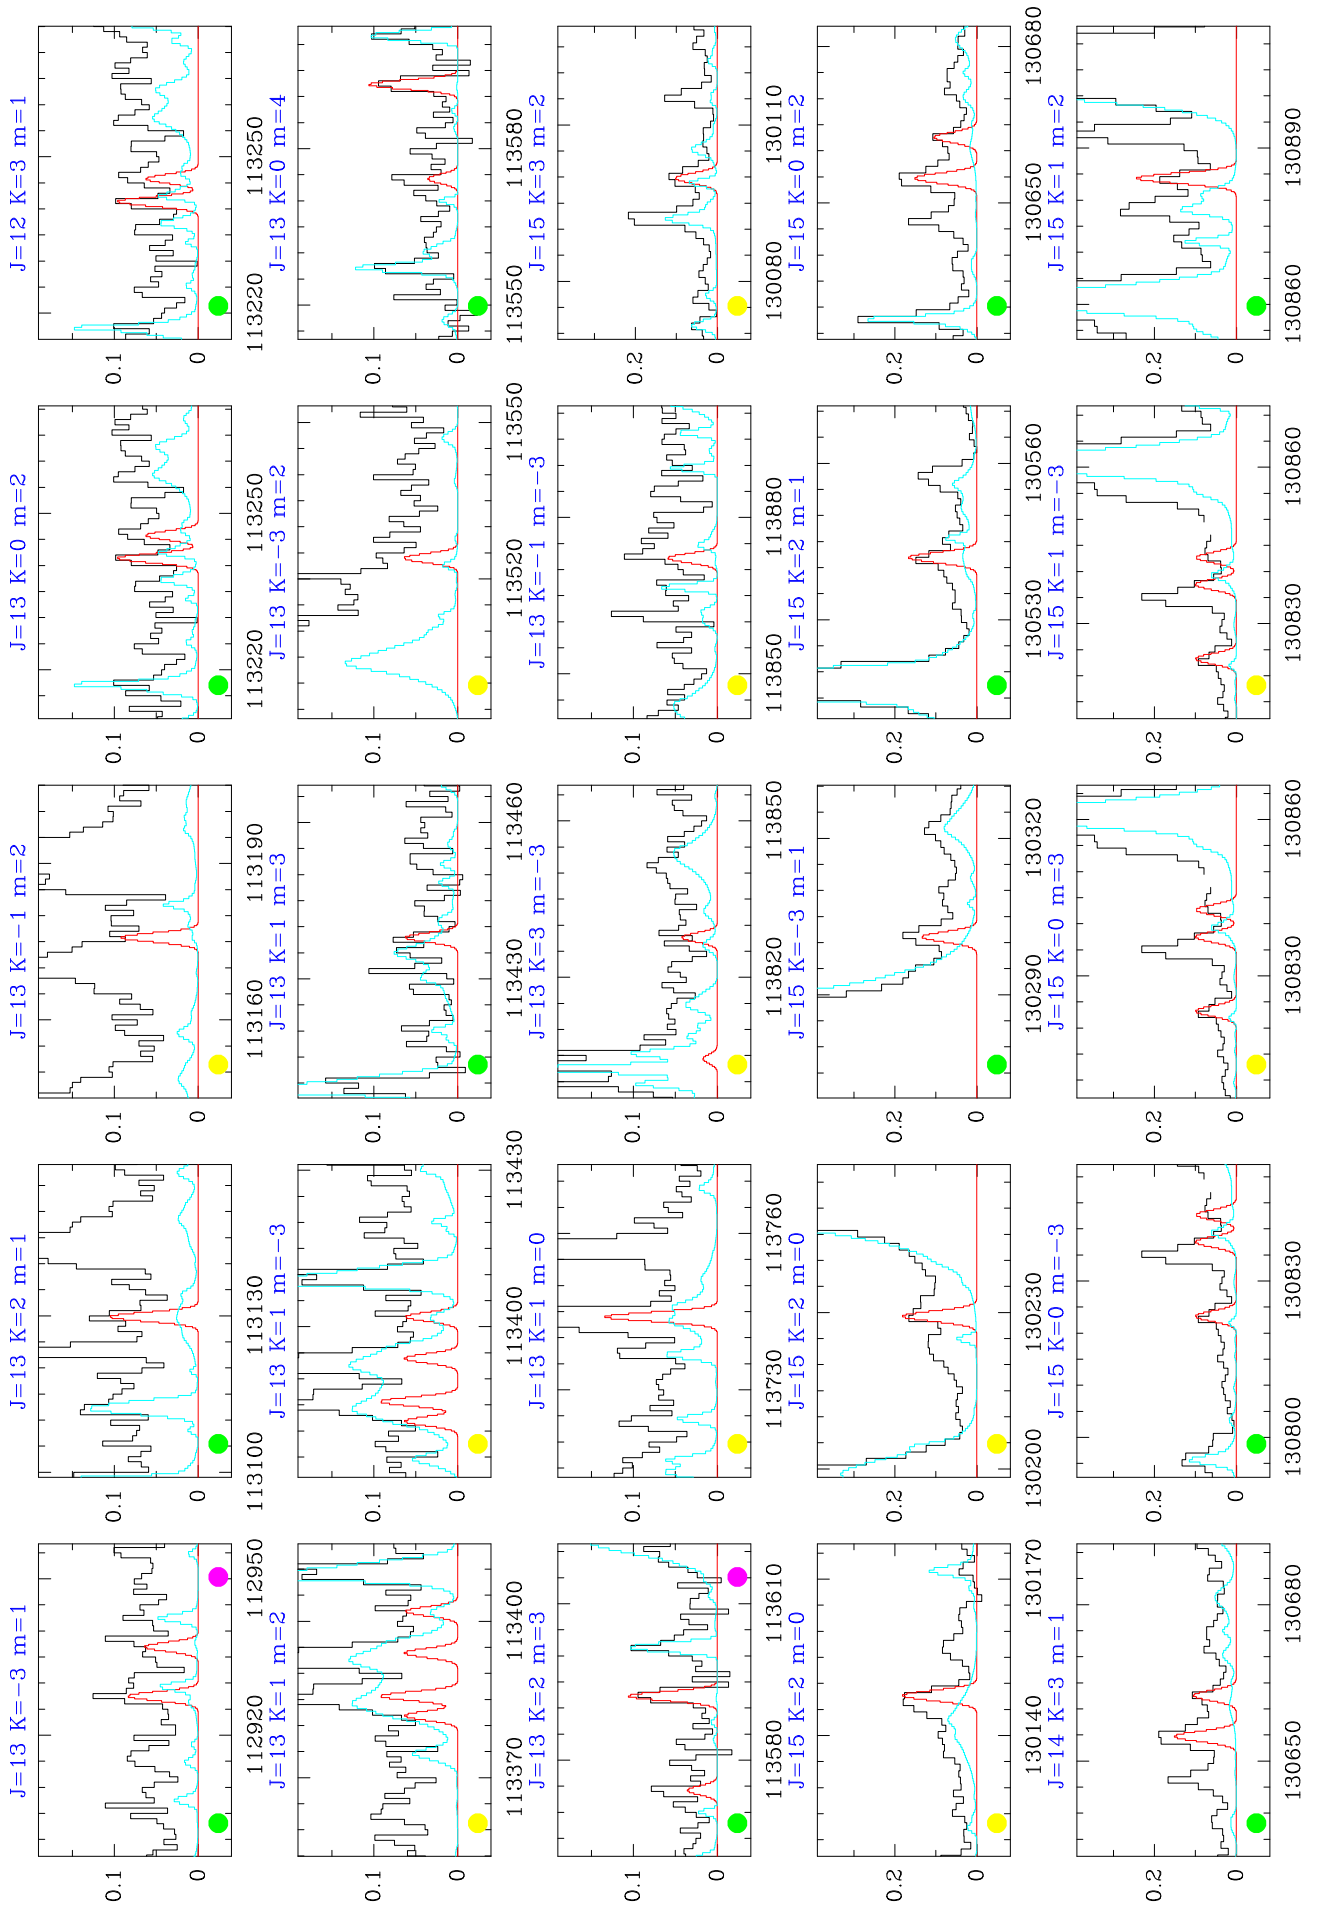



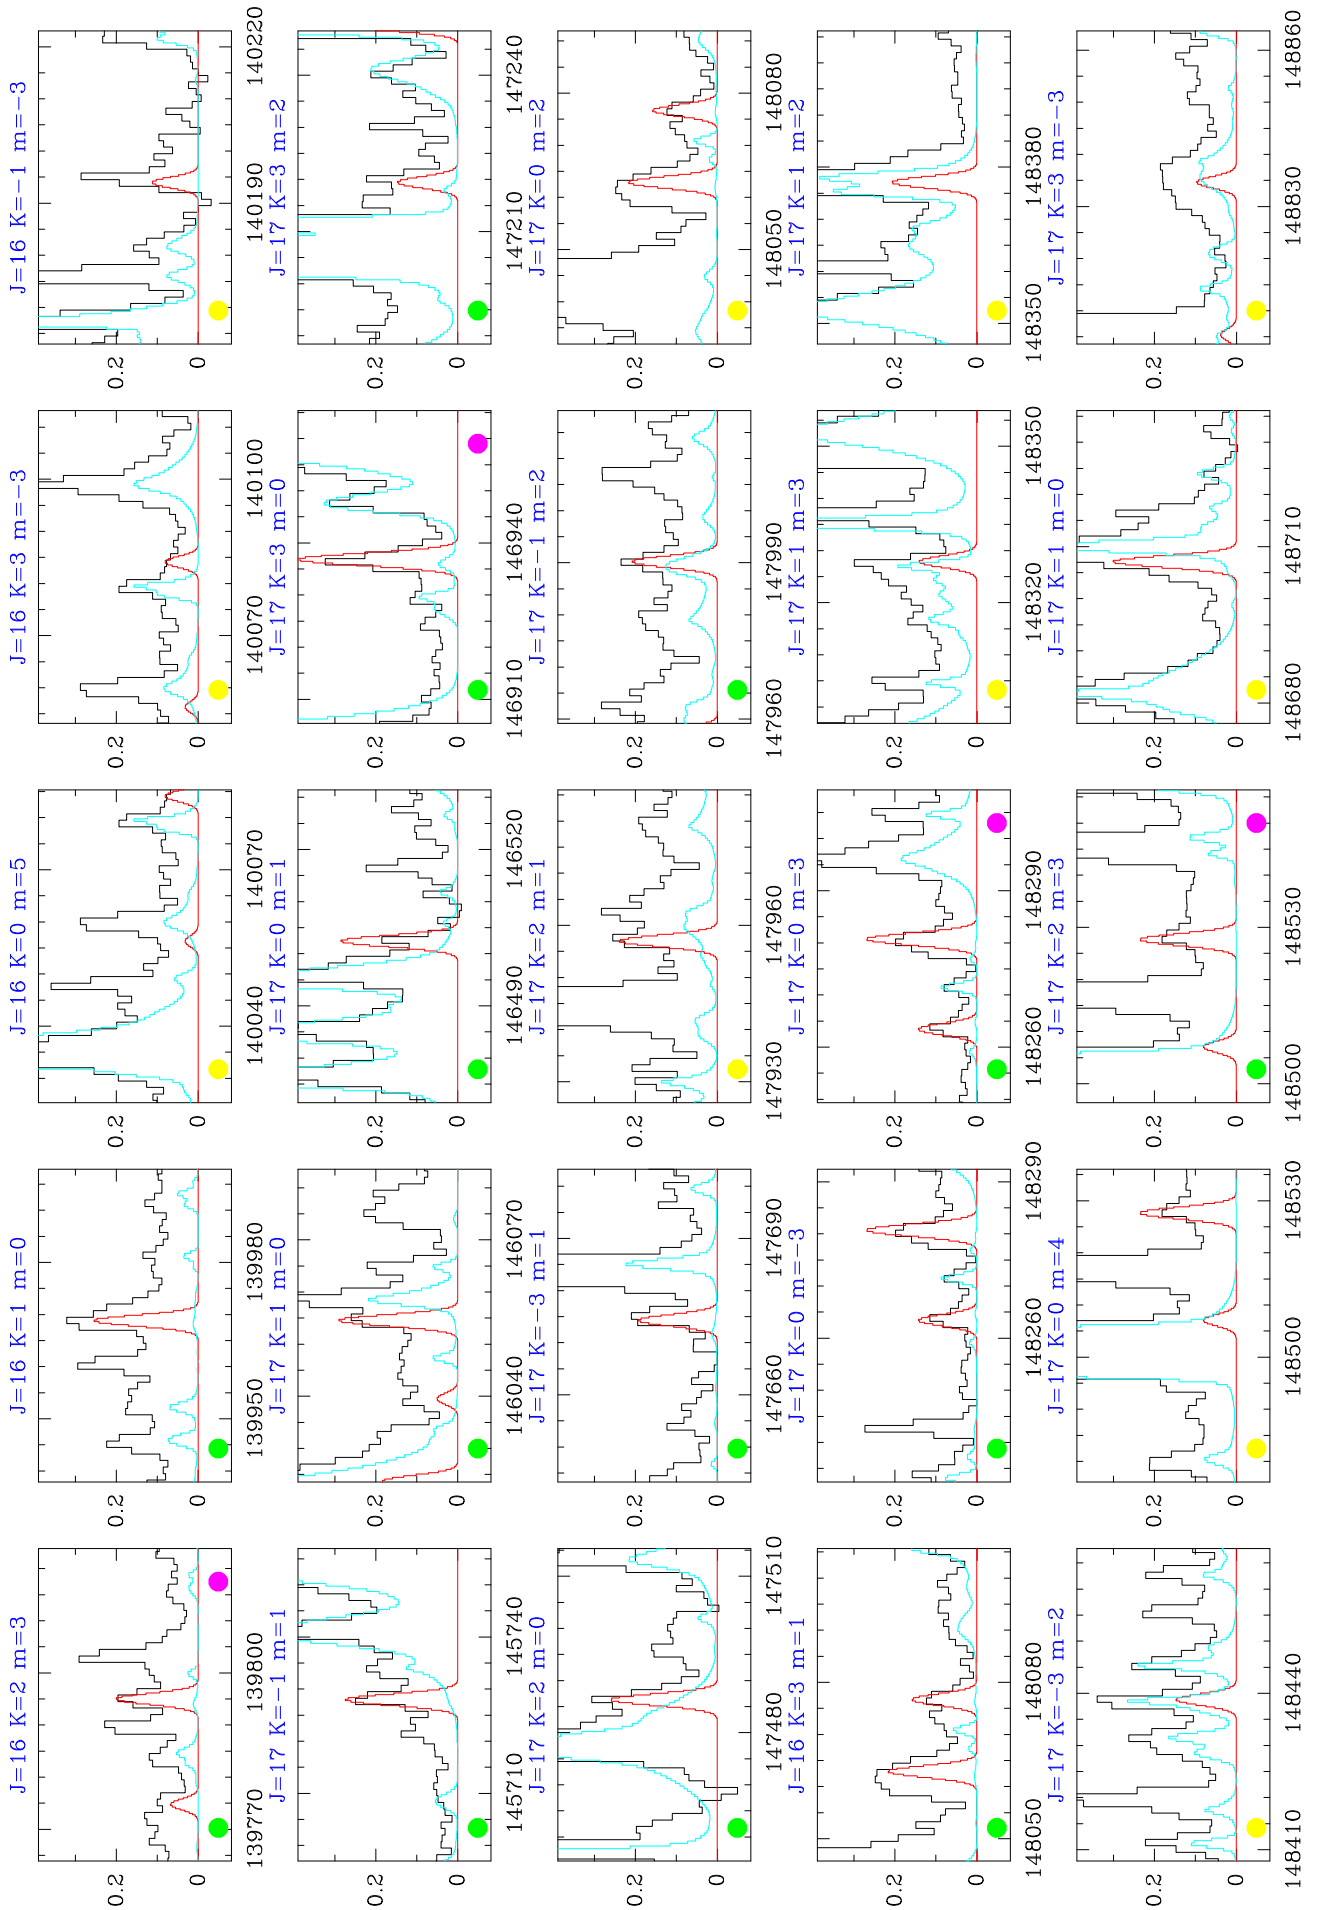

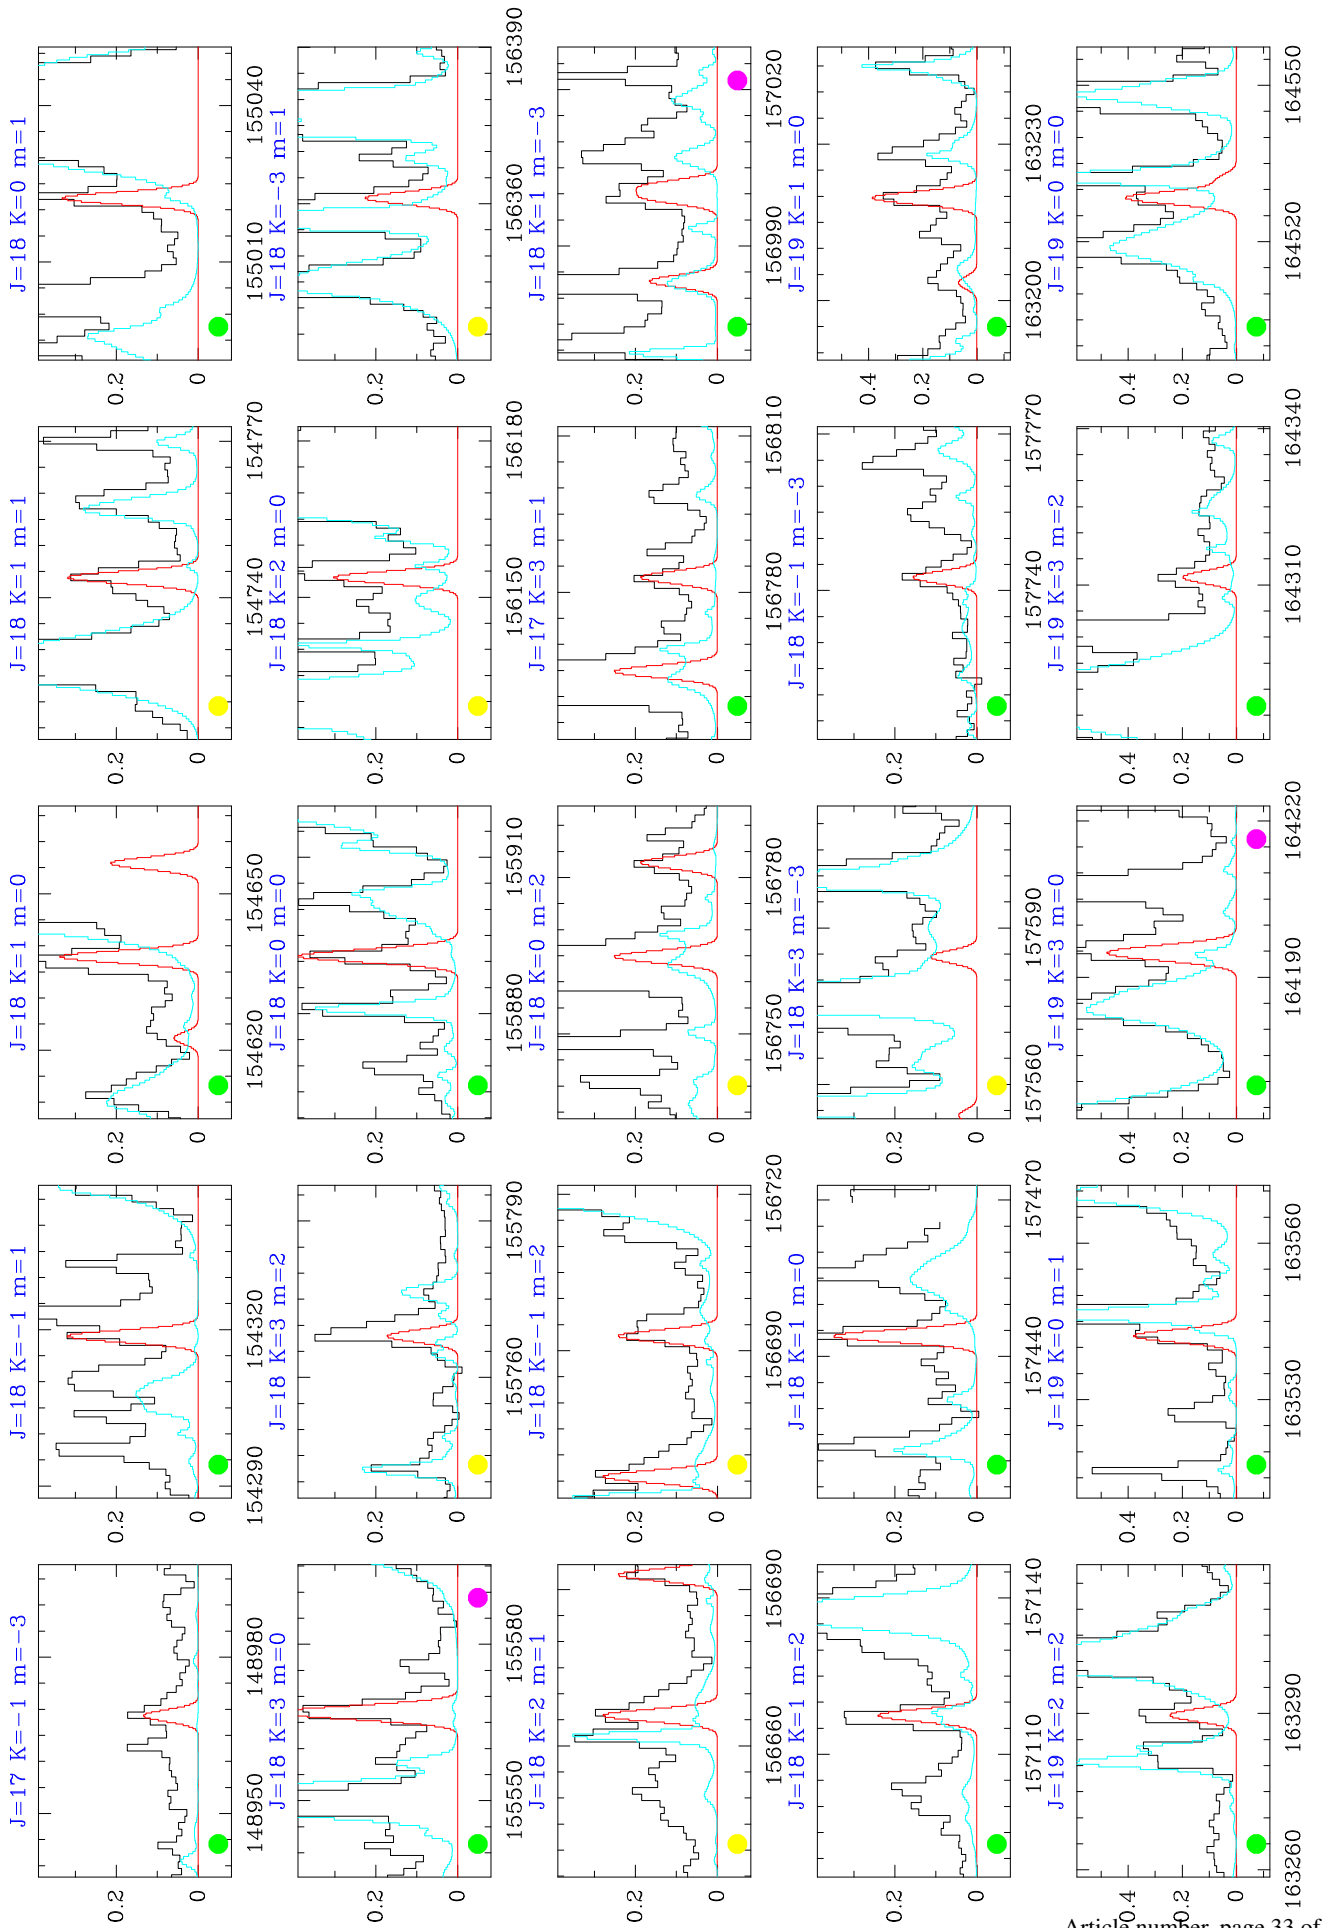

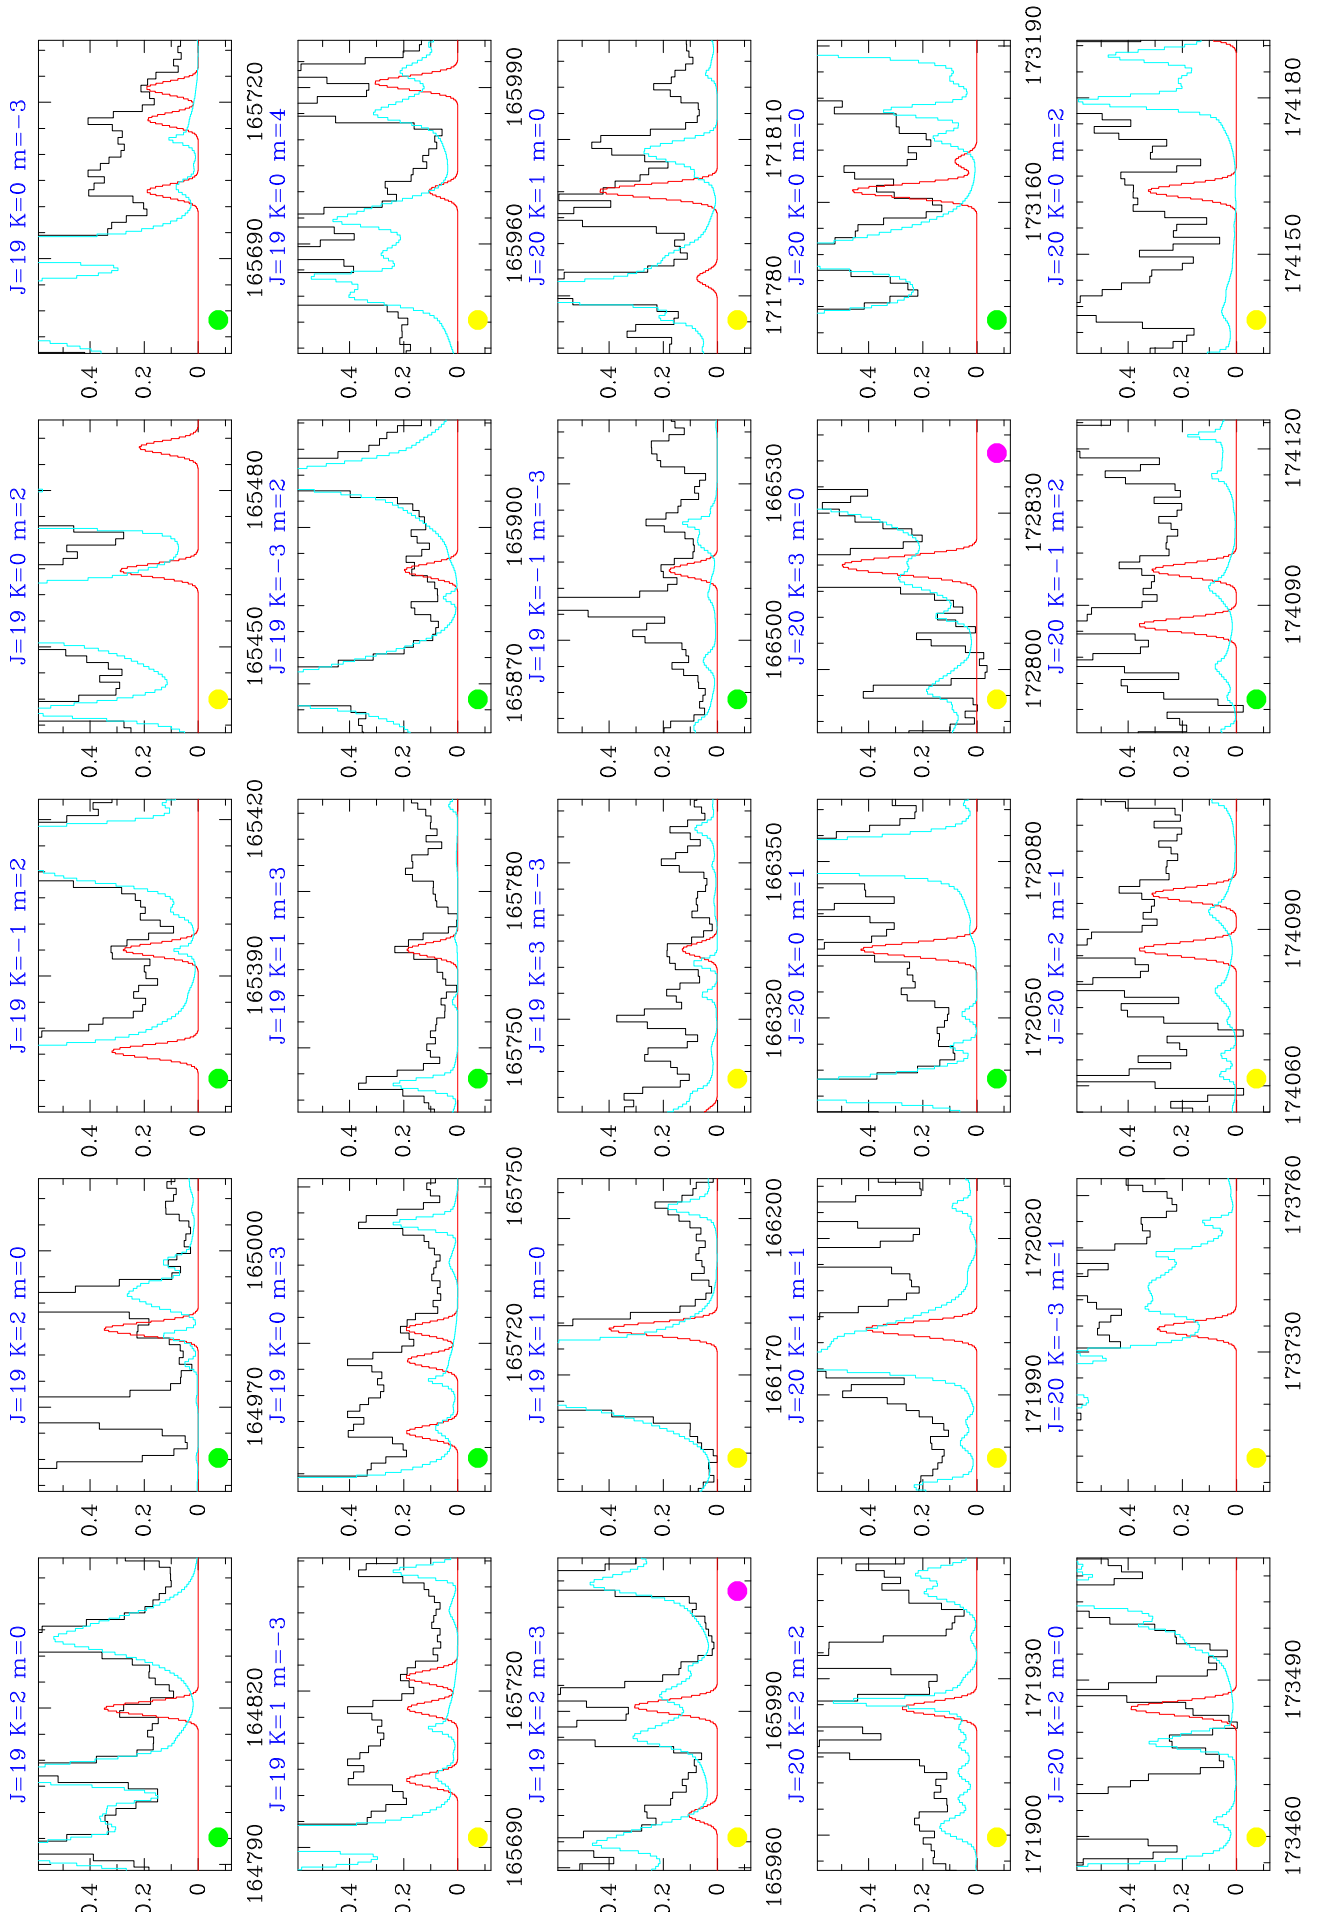

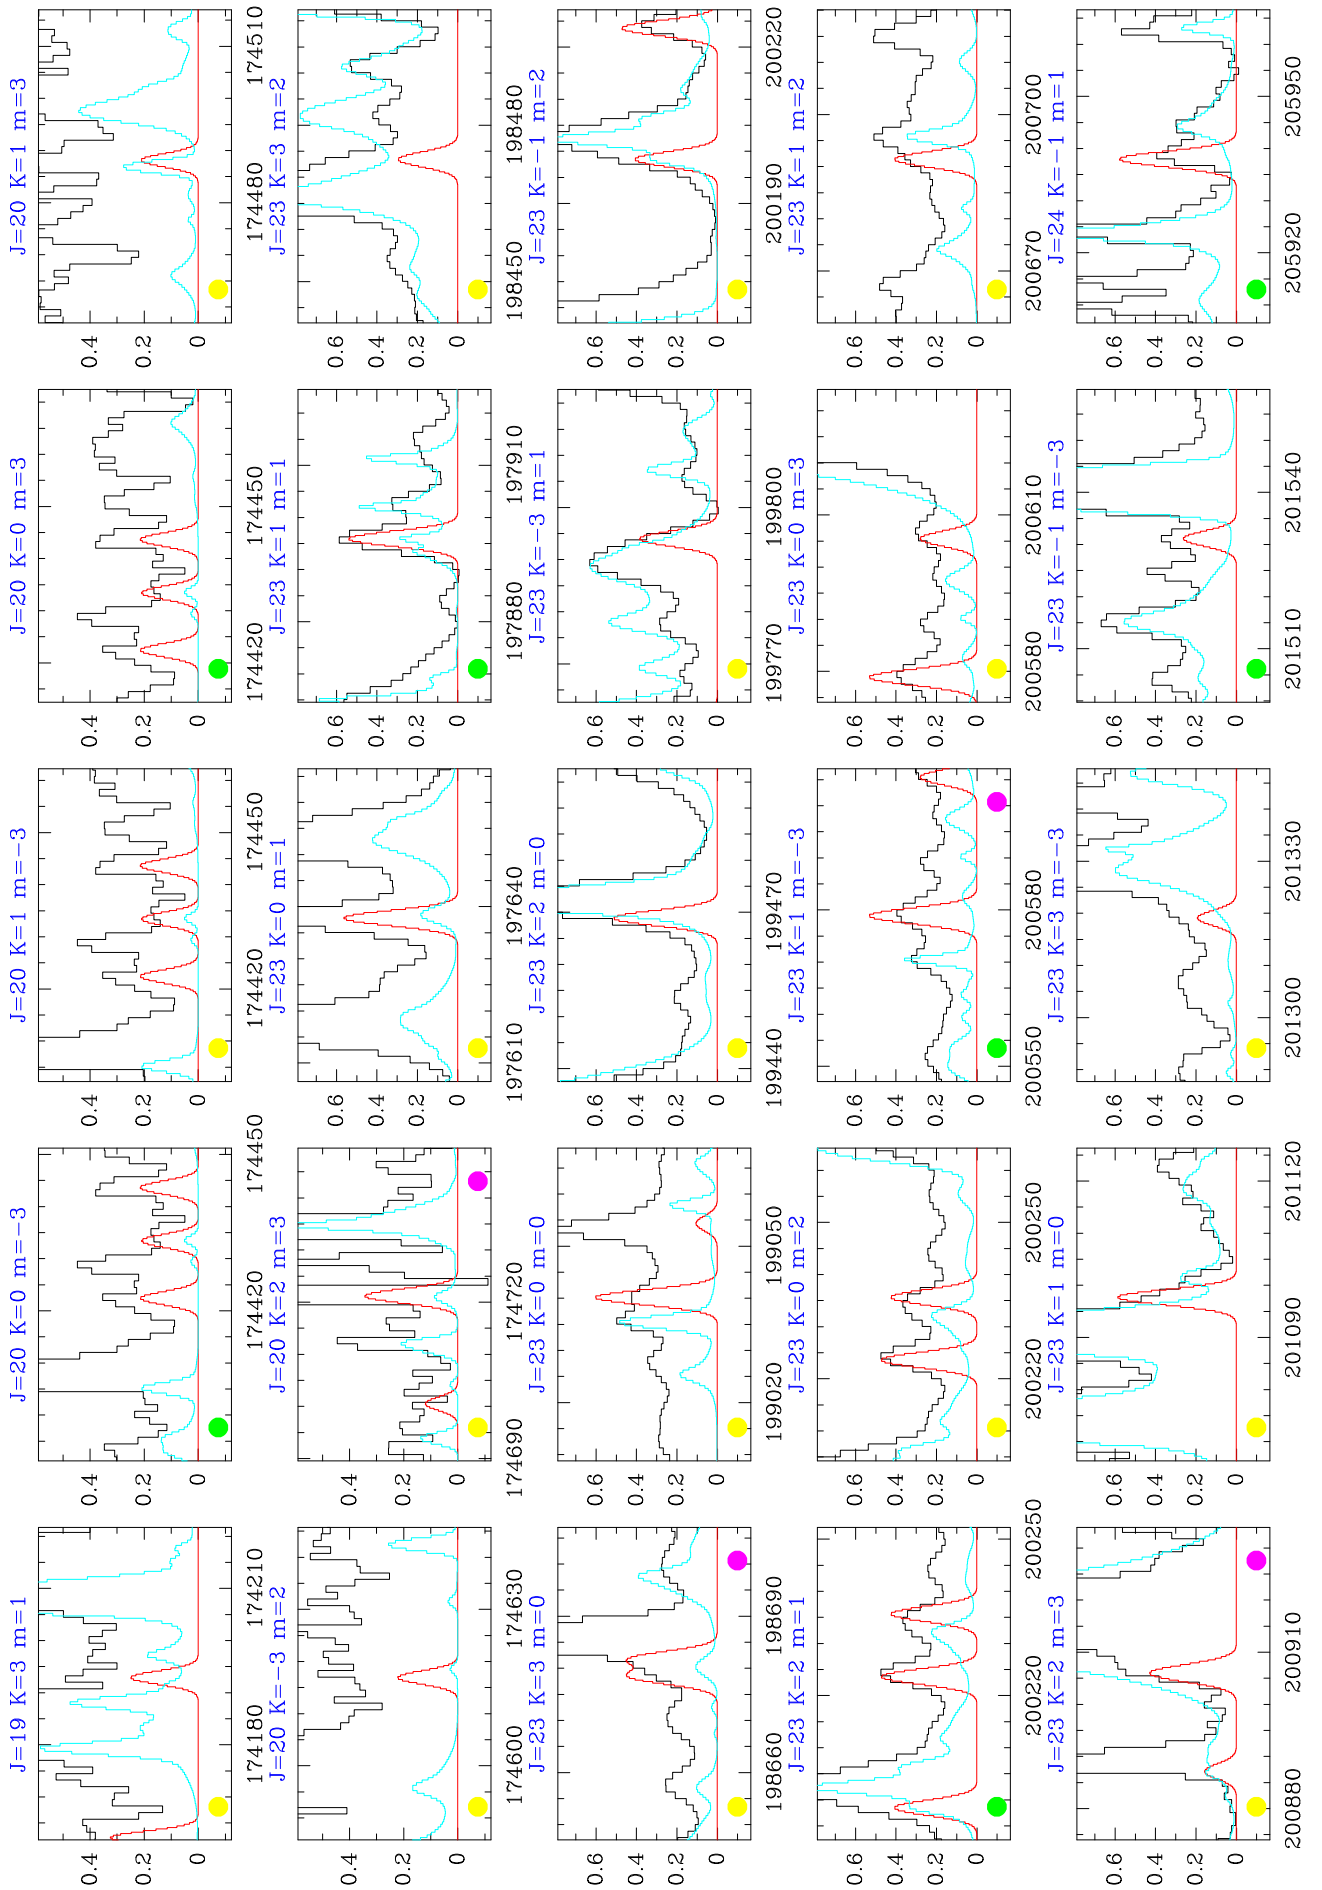





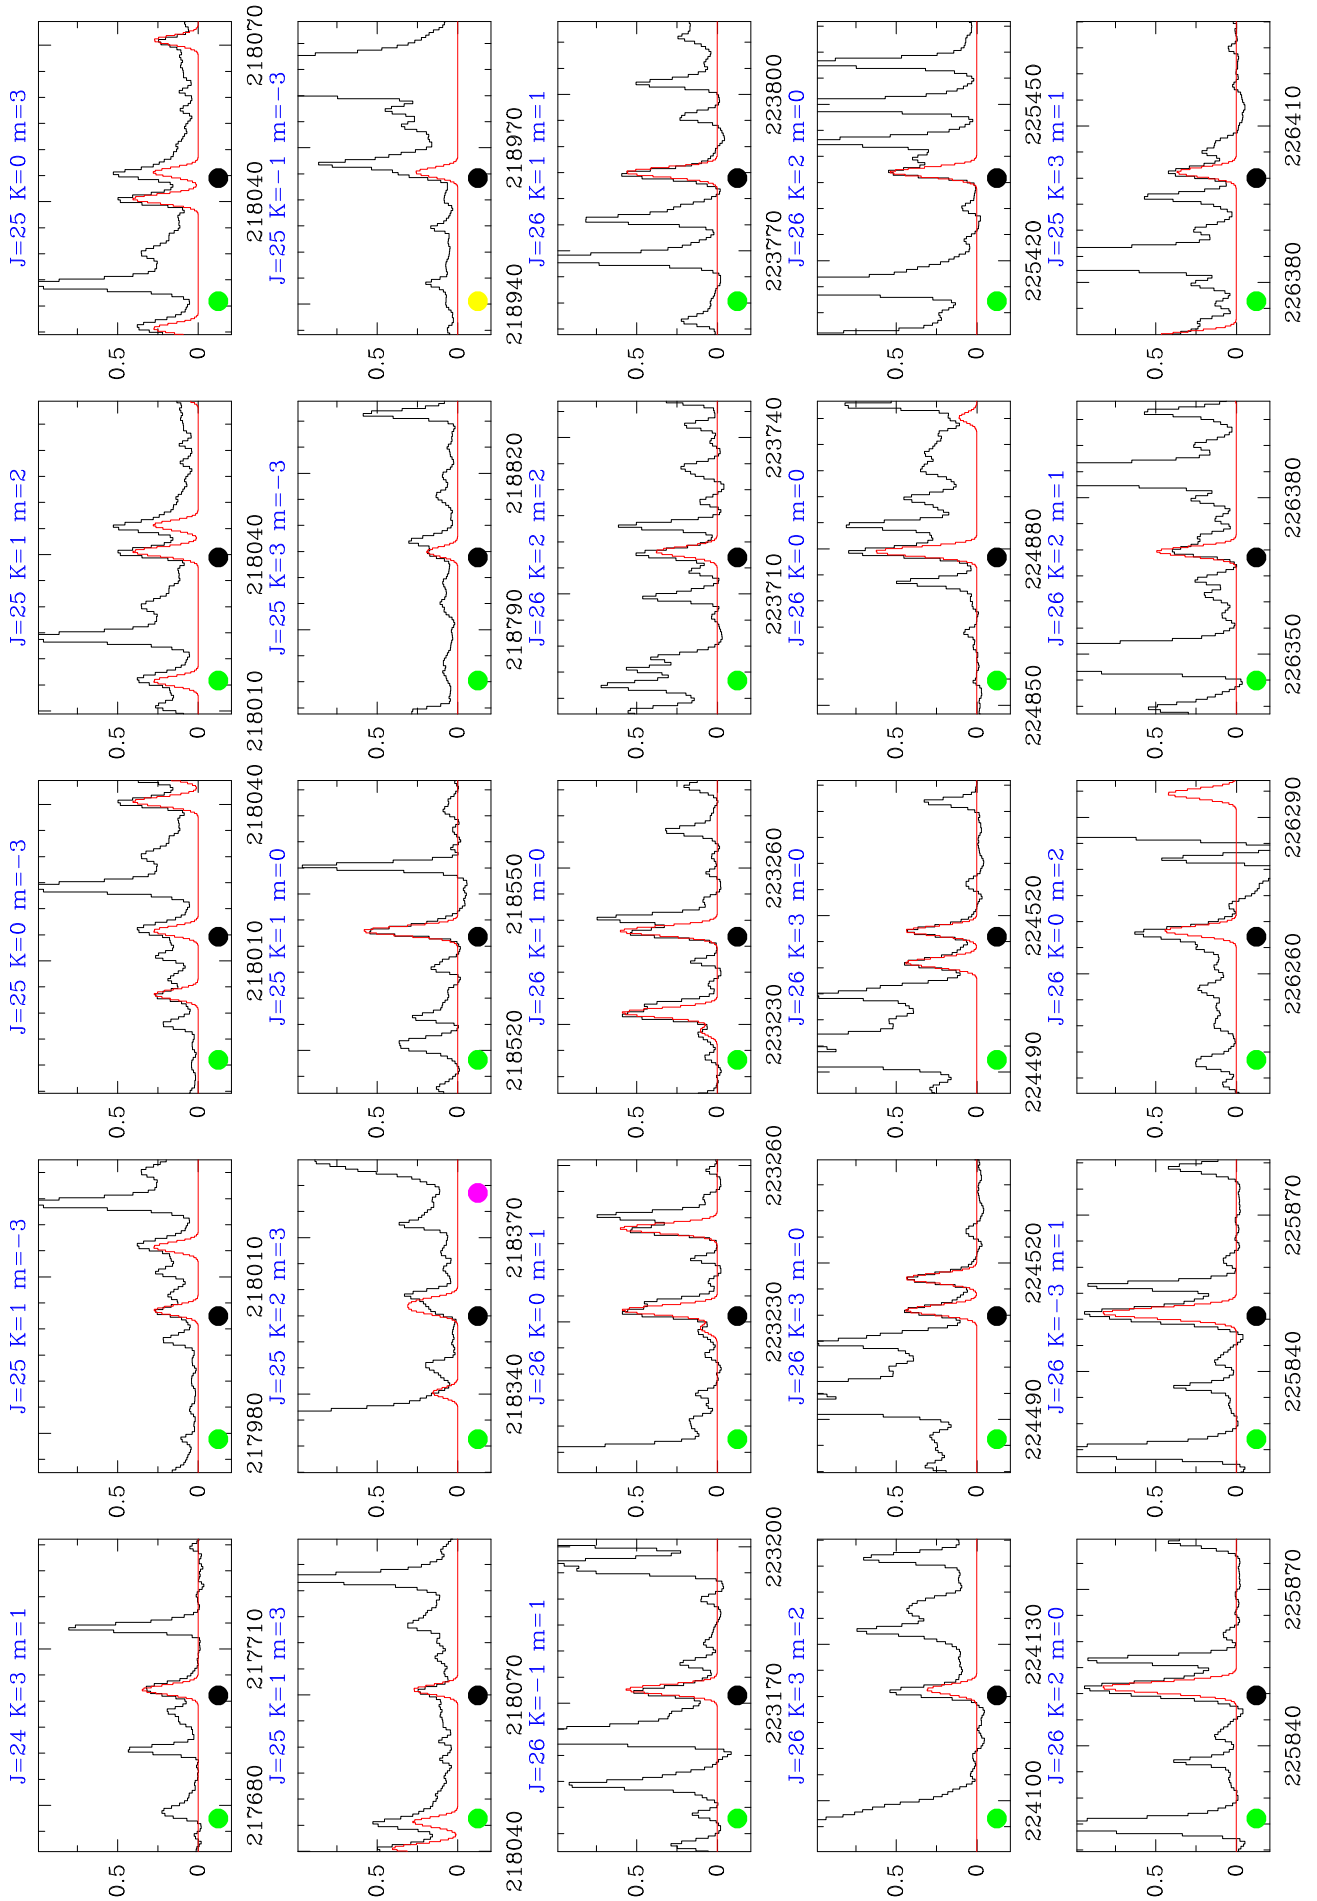

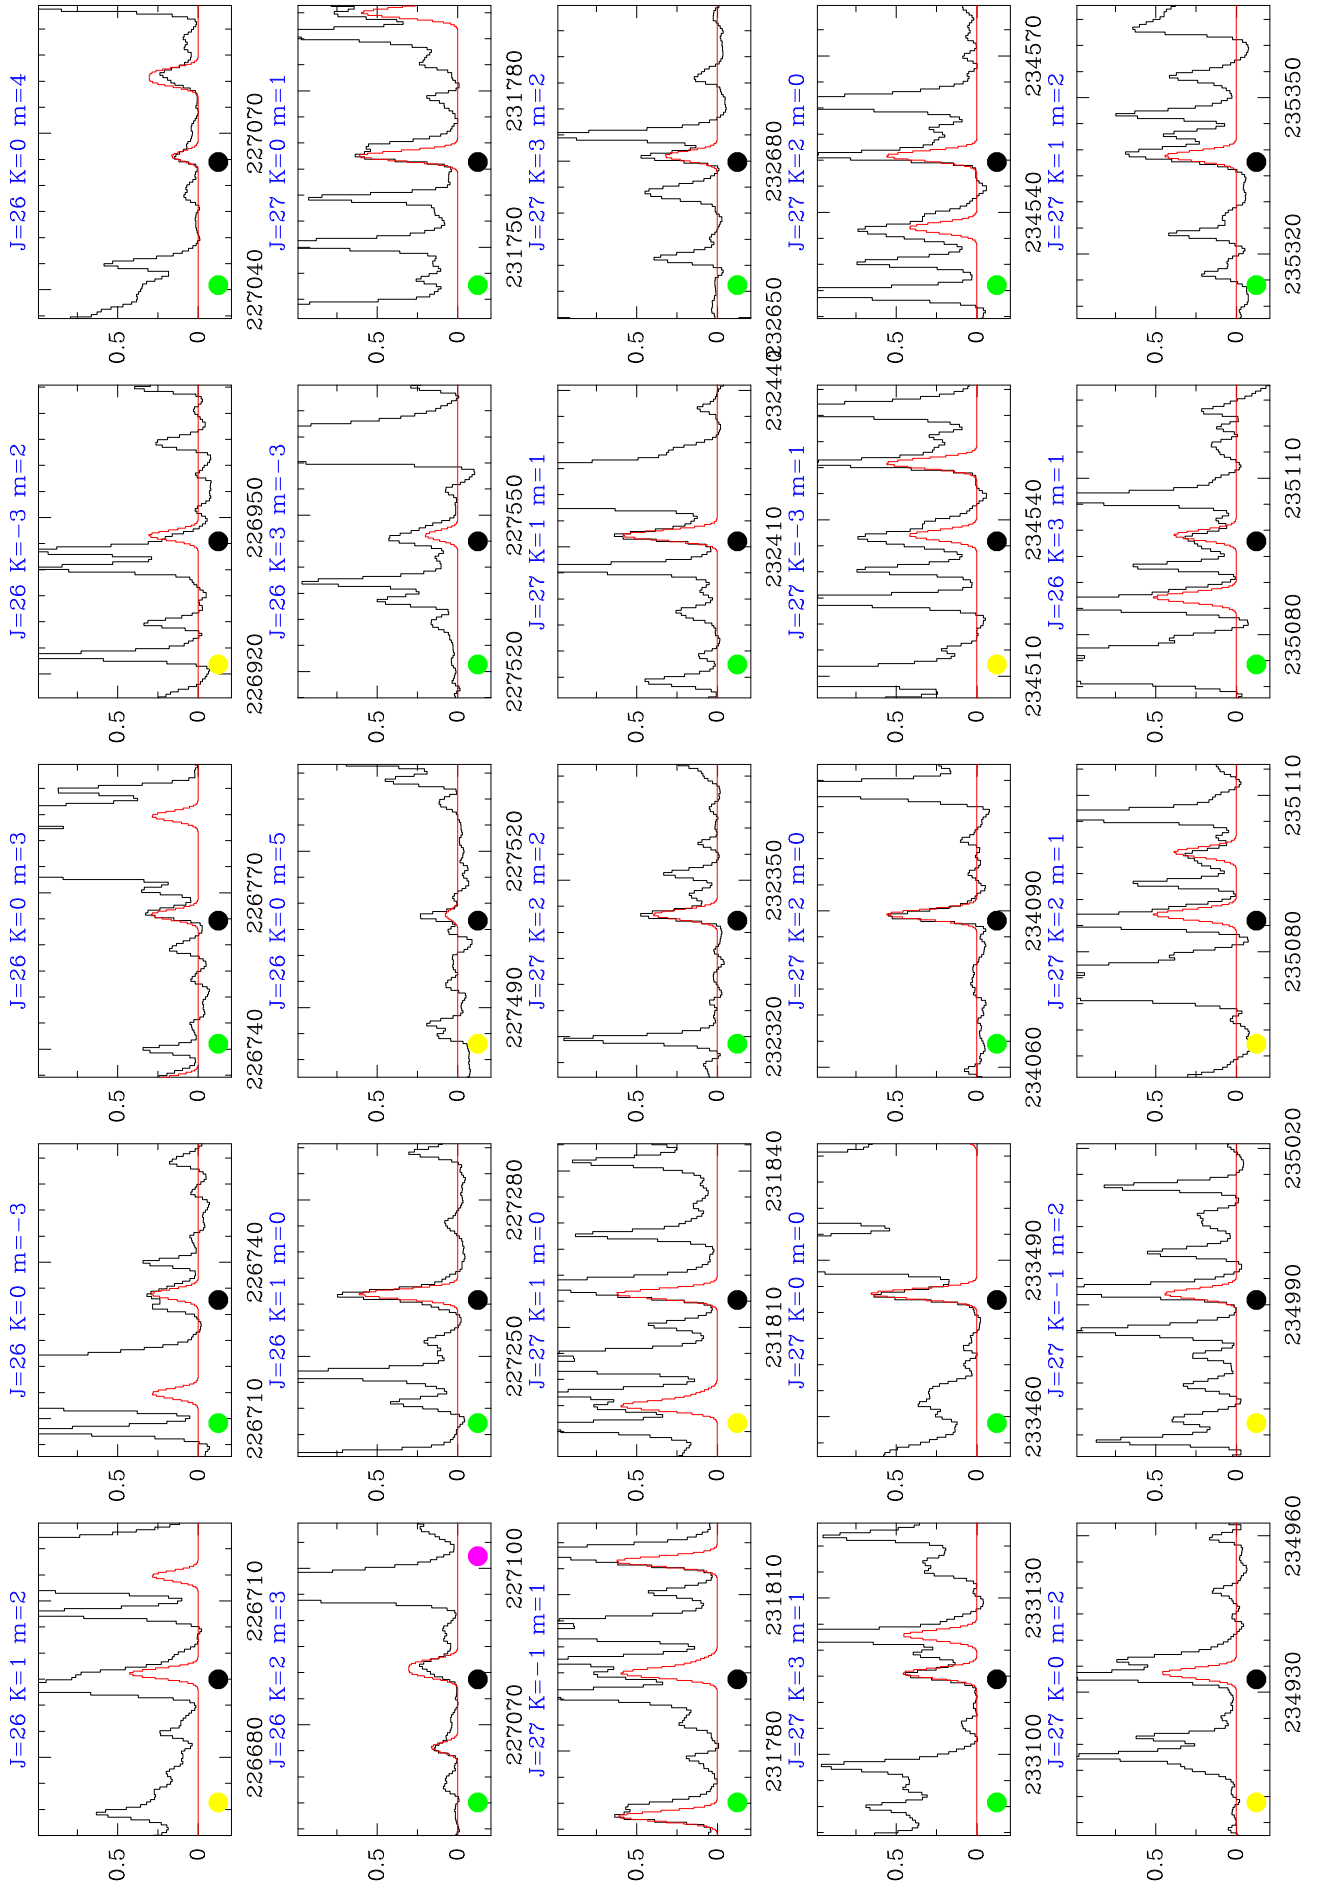

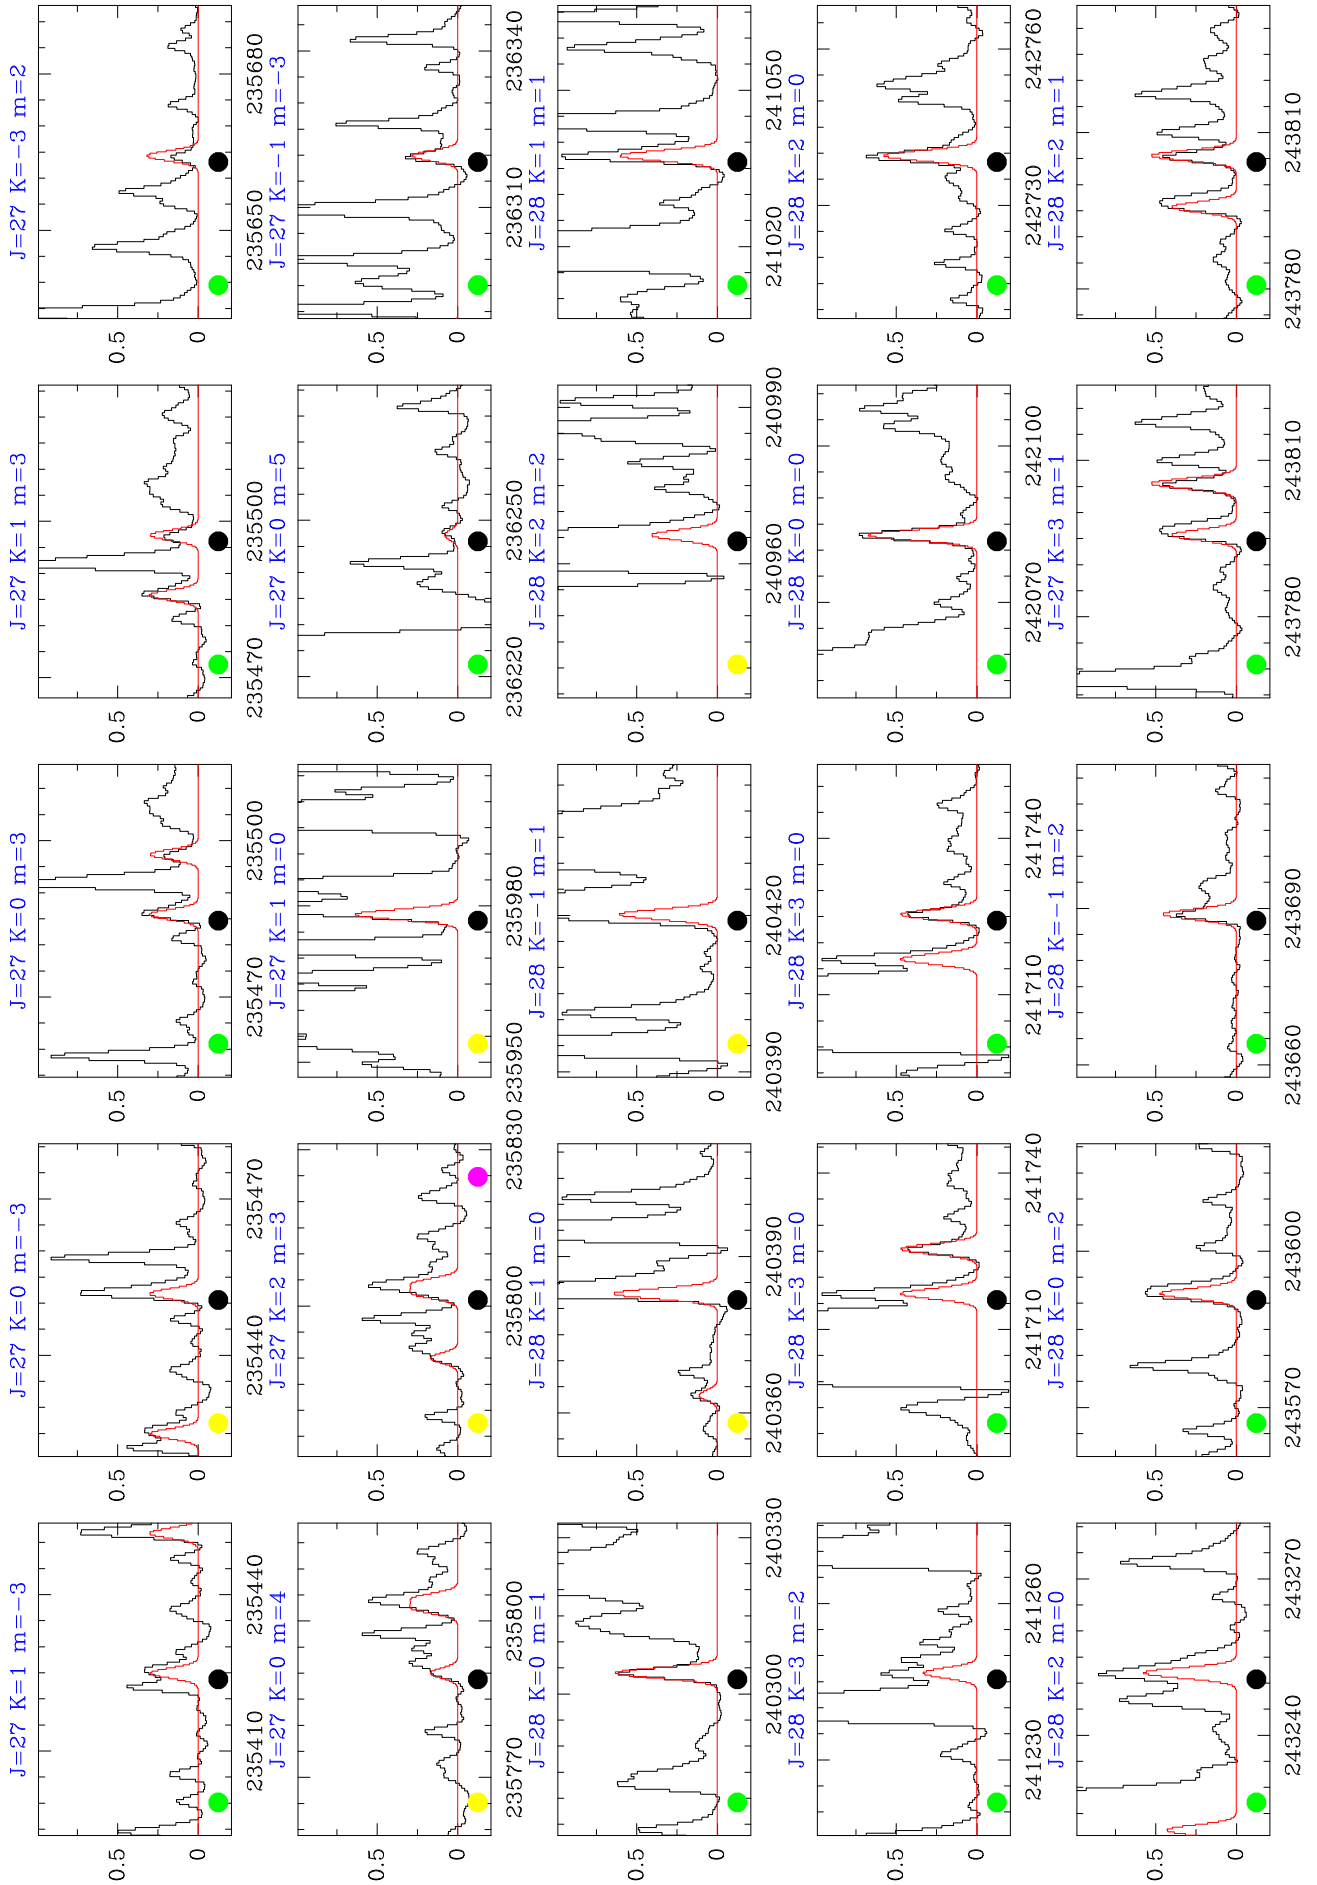

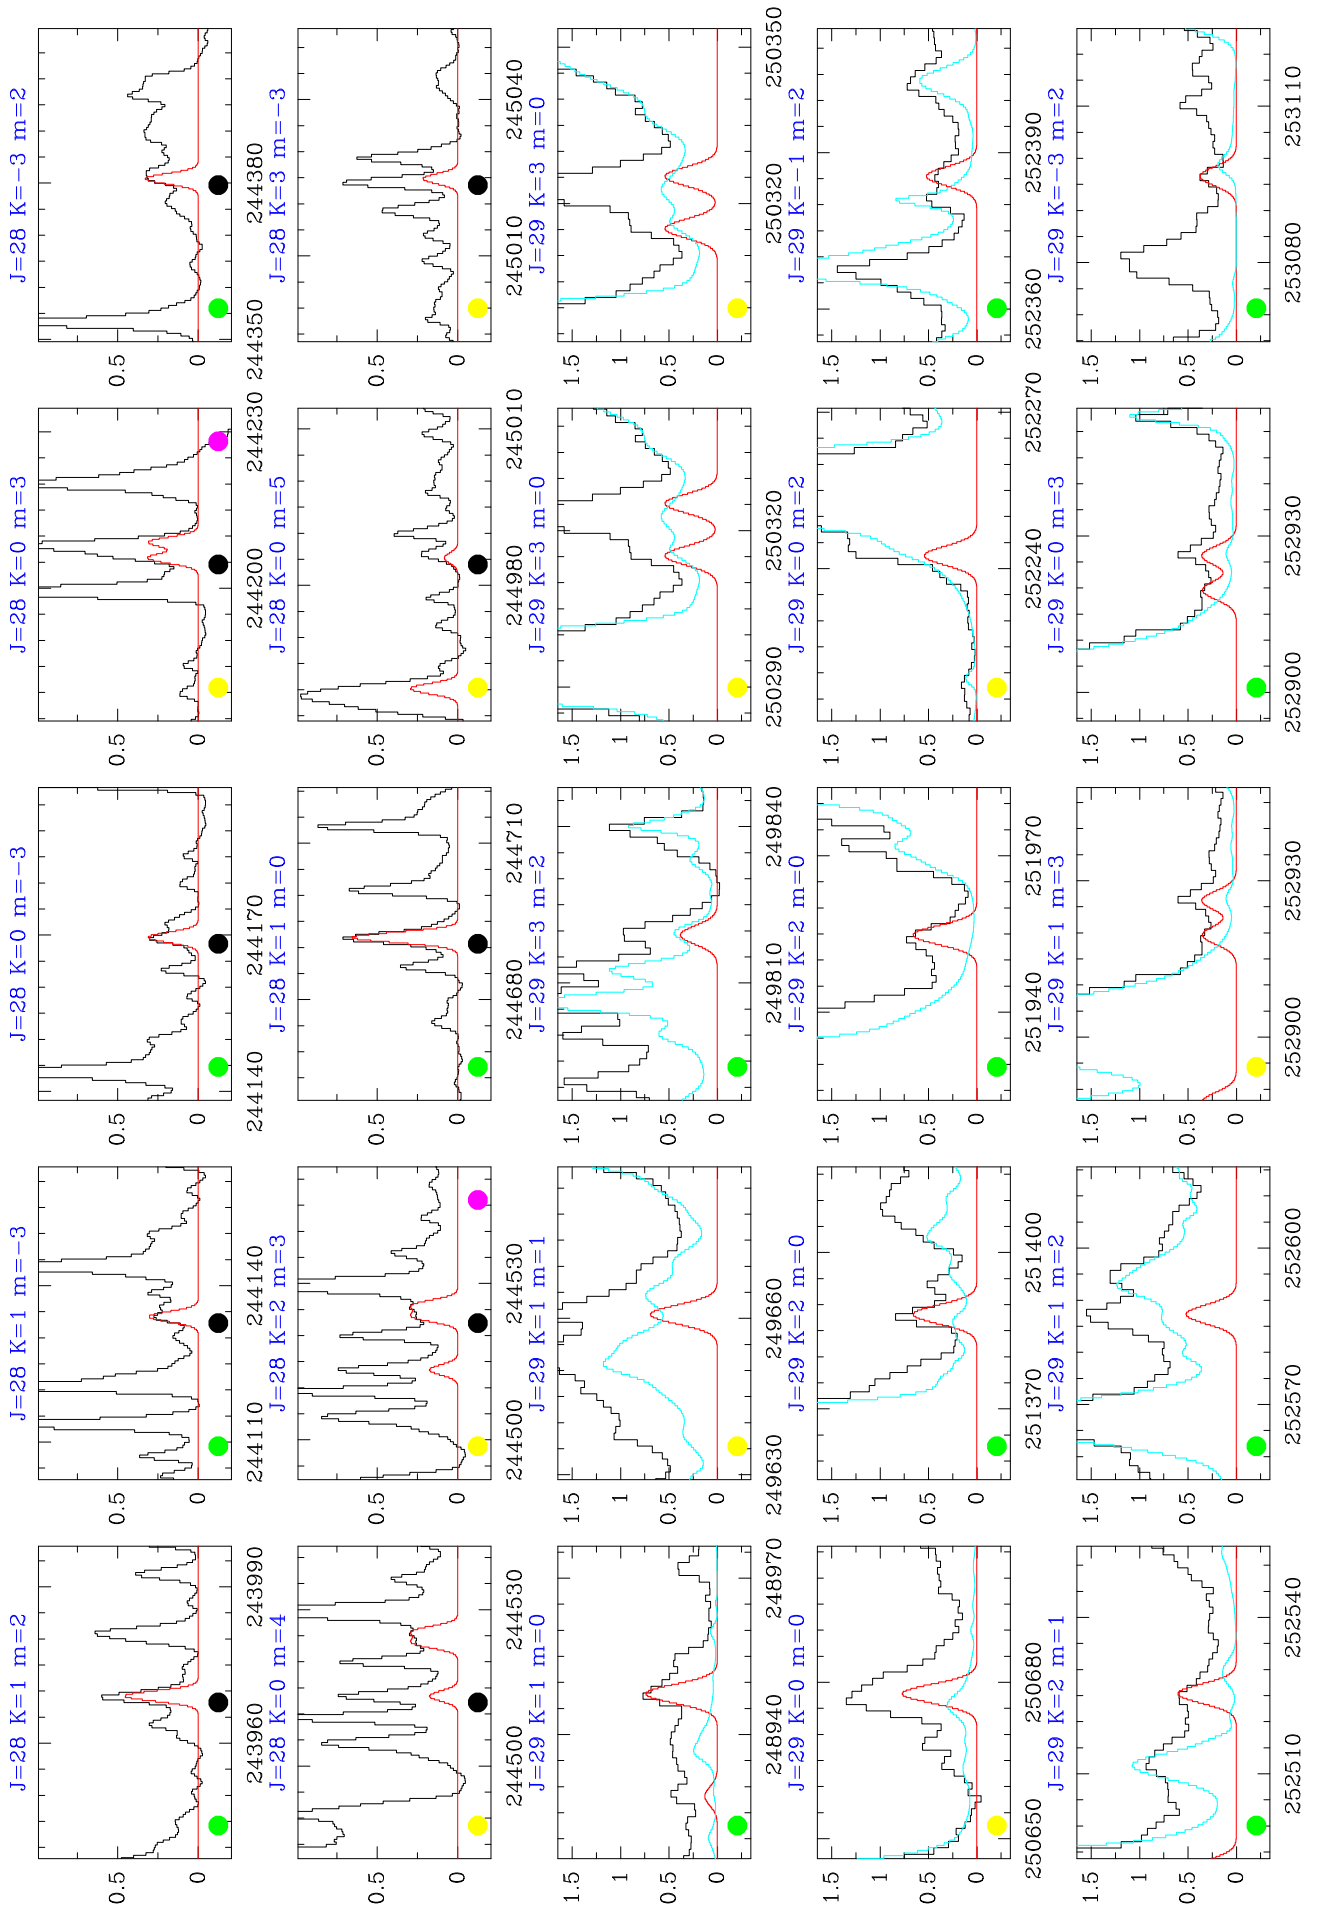

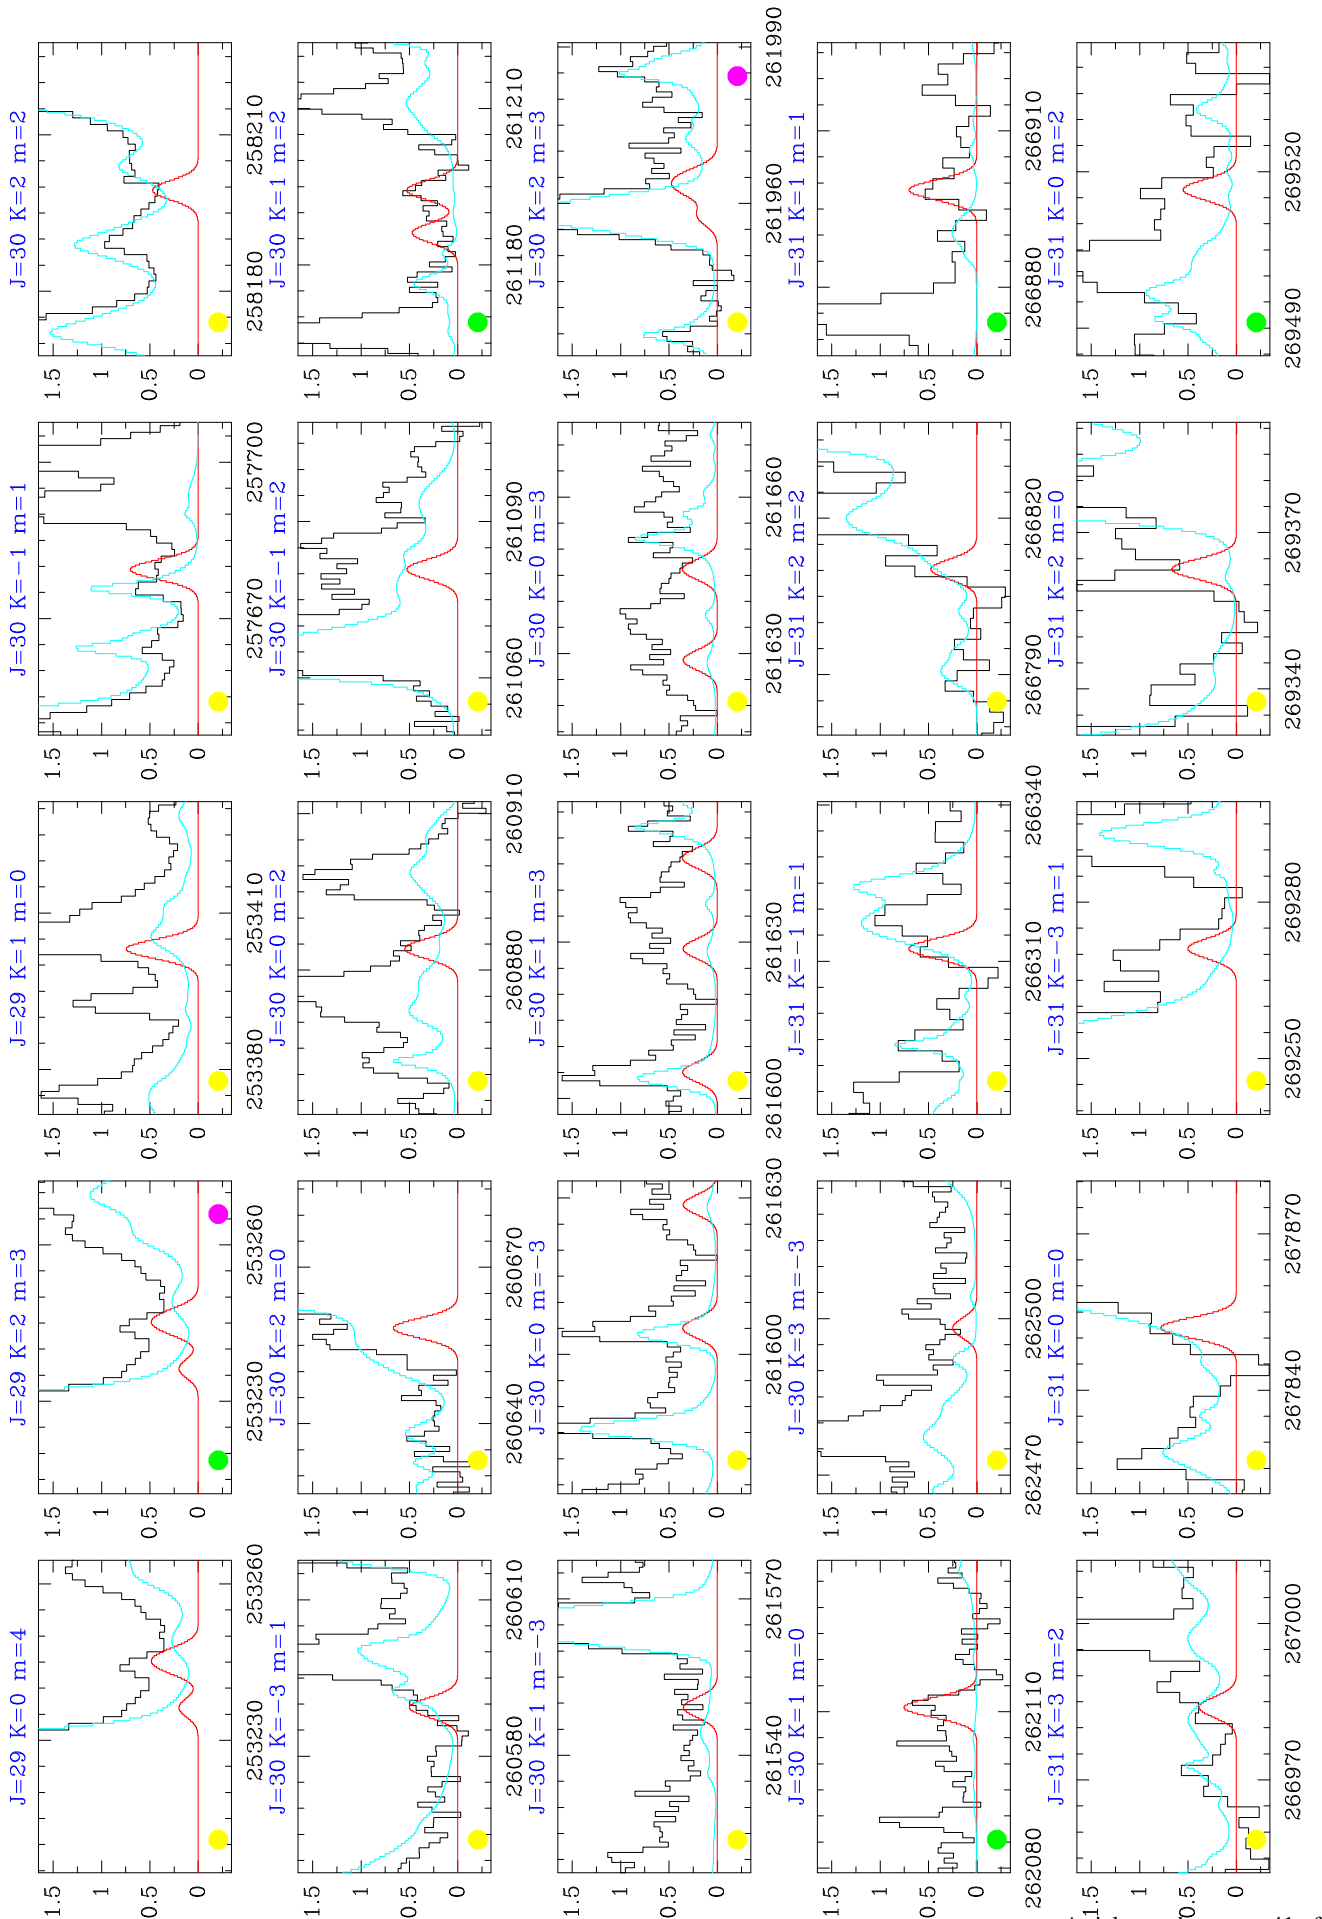

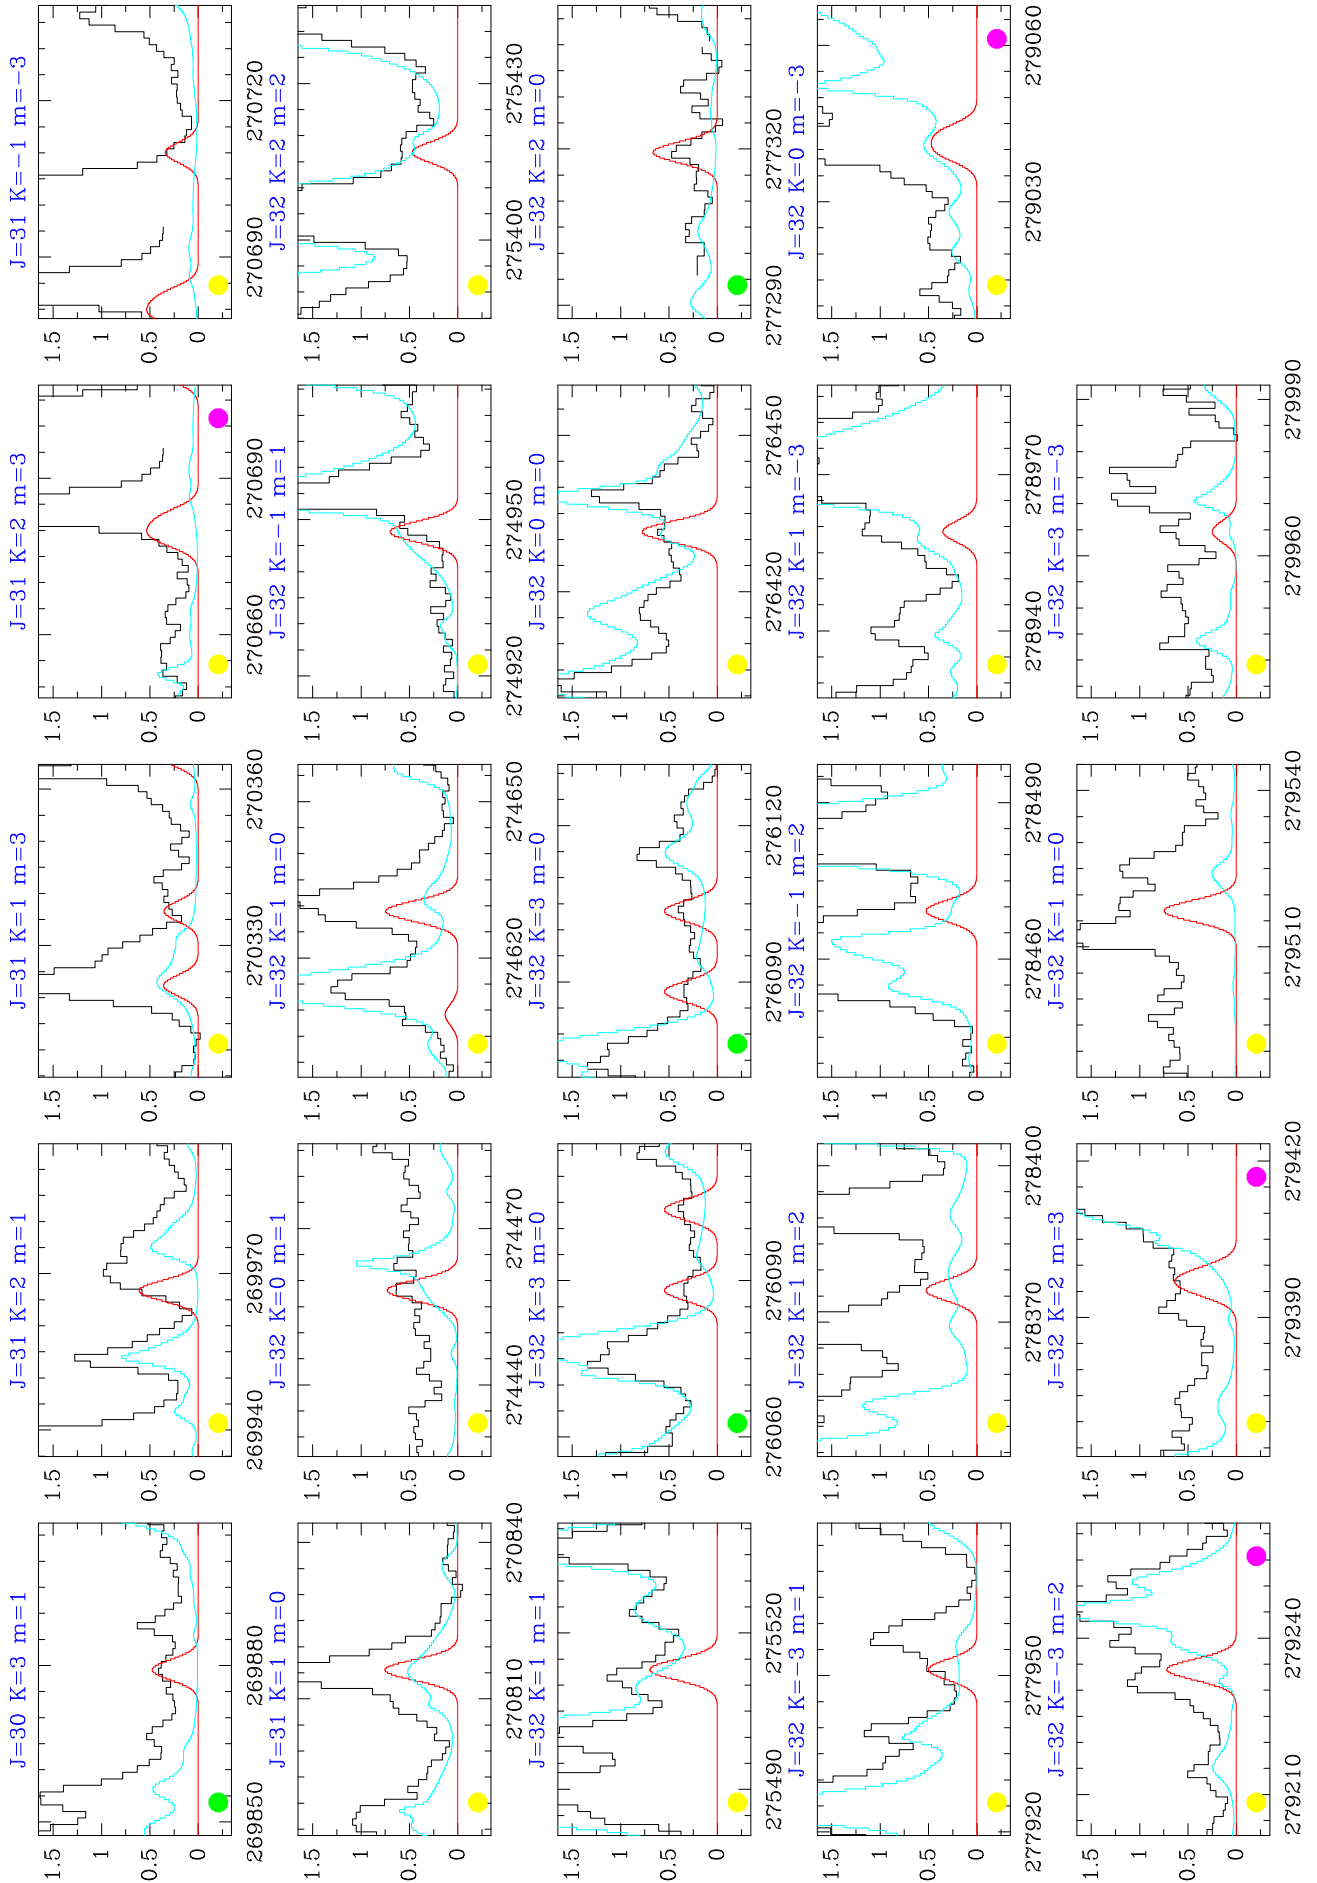

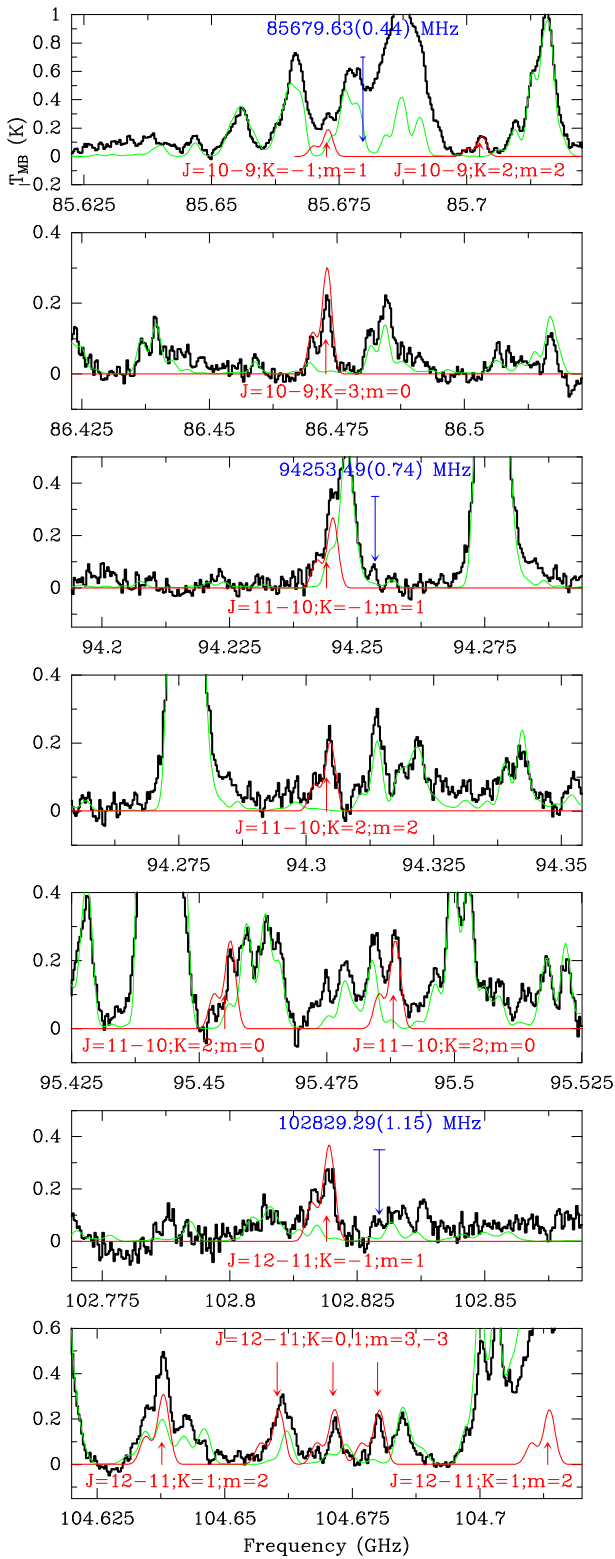

**Fig. B.2.** Selected lines of  $\text{CH}_3\text{NCO}$  in Sgr B2(N) at 3 mm. Observed data (black histogram spectrum) and total model of the source (green curve) are from Belloche et al. (2013). Our best model for  $\text{CH}_3\text{NCO}$  is given by the red line. Frequencies given by Halfen et al. (2015) with their uncertainty are indicated by the blue arrows and lines. A  $v_{\text{LSR}}$  of  $+64.0 \text{ km s}^{-1}$  is assumed.

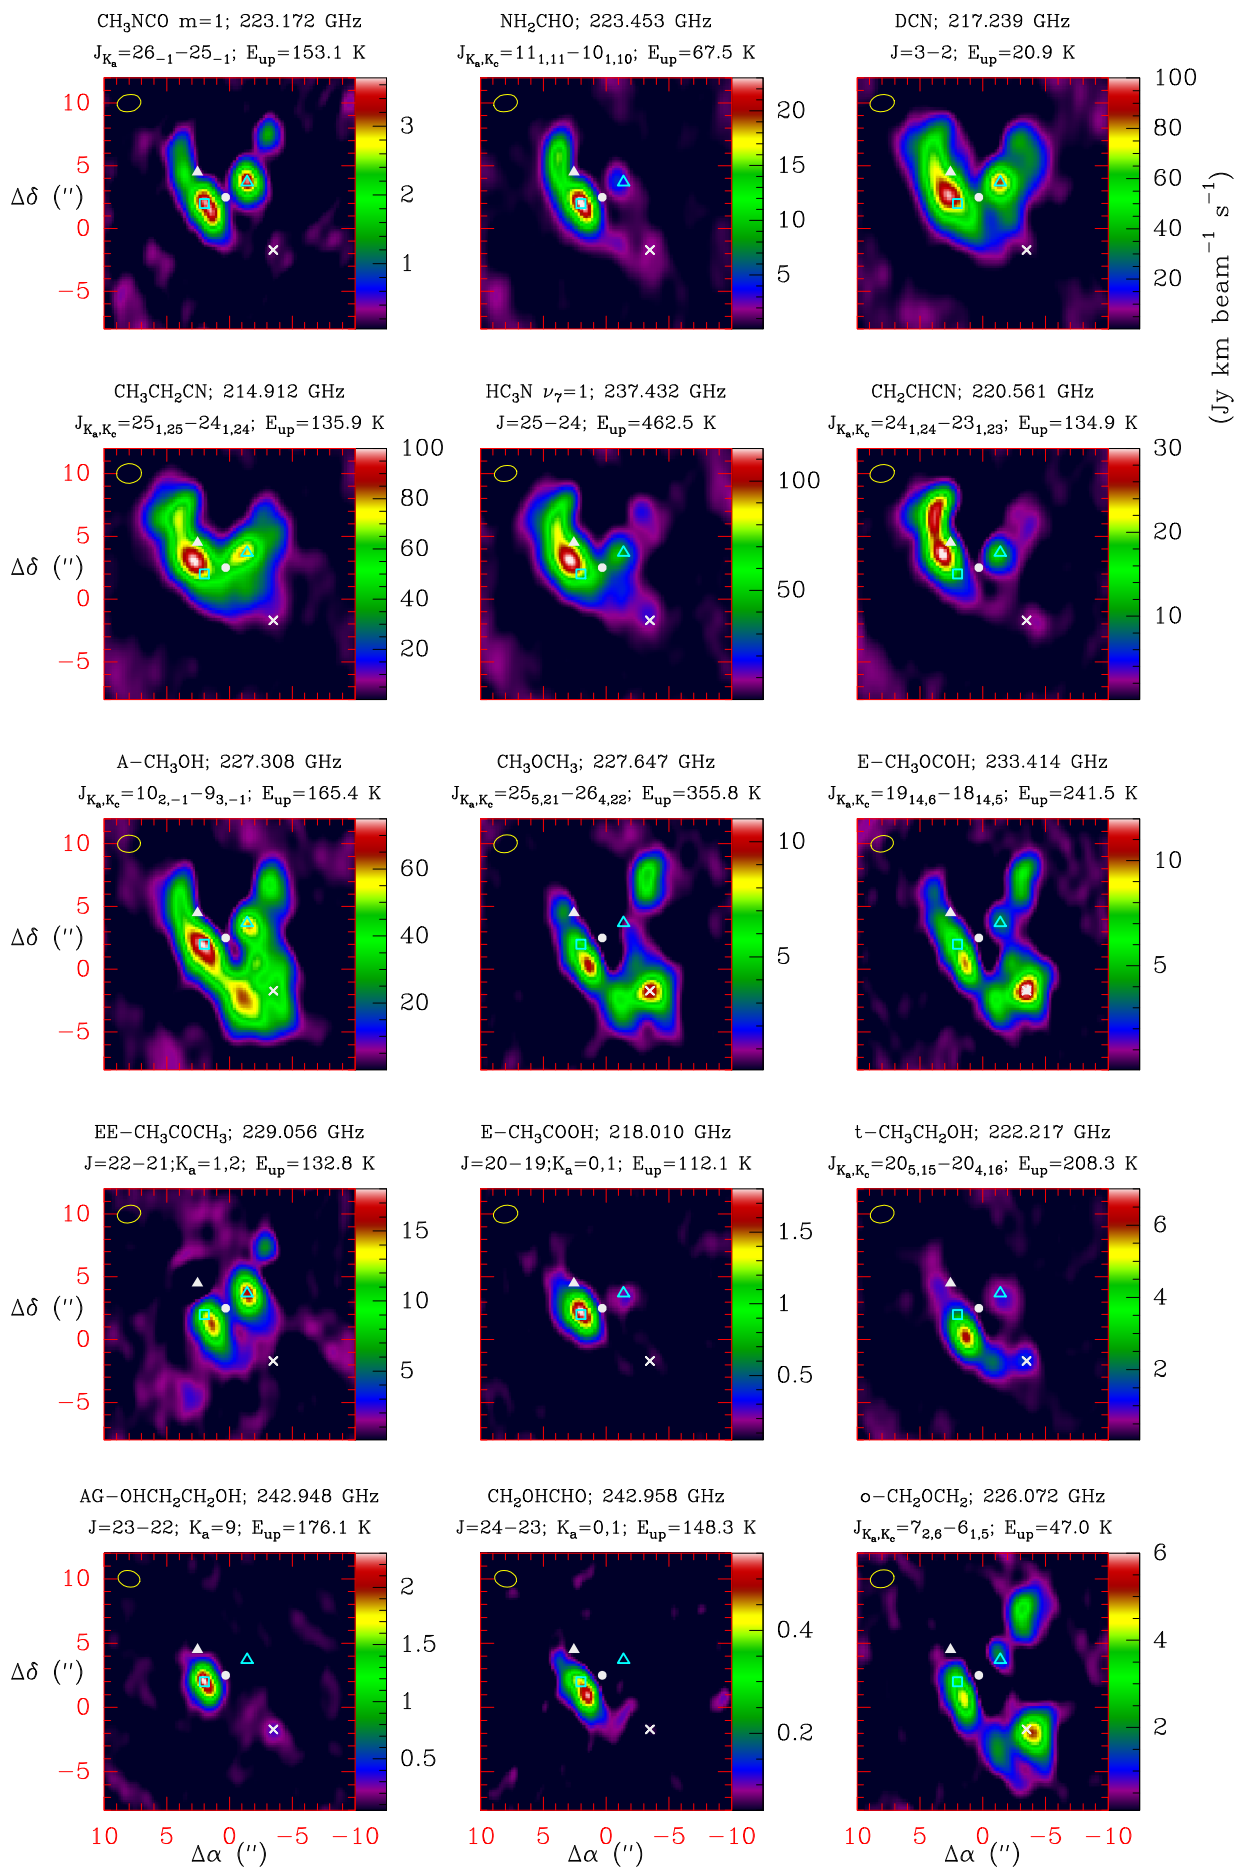

**Fig. B.3.** Spatial distribution of selected molecules from the ALMA data of Orion between 213–247 GHz (see text).



**Table B.3.** Model for the IRAM 30m data based on previously analysed molecular species

| Reference                              | Studied species                                                                                                                                  | Notes           |
|----------------------------------------|--------------------------------------------------------------------------------------------------------------------------------------------------|-----------------|
| Tercero et al. (2010) <sup>†</sup>     | OCS, CS, H <sub>2</sub> CS, HCS <sup>+</sup> , CCS, CCCS                                                                                         | (b) (c)         |
| Tercero et al. (2011) <sup>†</sup>     | SiO, SiS                                                                                                                                         | (b) (c)         |
| Daly et al. (2013) <sup>†</sup>        | CH <sub>3</sub> CH <sub>2</sub> CN                                                                                                               | (a) (b) (c)     |
| Esplugues et al. (2013a) <sup>†</sup>  | SO, SO <sub>2</sub>                                                                                                                              | (b) (c)         |
| Esplugues et al. (2013b) <sup>†</sup>  | HC <sub>3</sub> N, HC <sub>5</sub> N                                                                                                             | (b) (c) (d)     |
| López et al. (2014) <sup>†</sup>       | CH <sub>2</sub> CHCN                                                                                                                             | (a) (b) (c)     |
| Marcelino et al. in prep. <sup>†</sup> | HCN, HNC, HCO <sup>+</sup>                                                                                                                       | (b) (c) (d) (e) |
| Demyk et al. (2007)                    | <sup>13</sup> C-CH <sub>3</sub> CH <sub>2</sub> CN                                                                                               | (a) (c)         |
| Margulès et al. (2009)                 | CH <sub>3</sub> CH <sub>2</sub> C <sup>15</sup> N, CH <sub>3</sub> CHDCN, CH <sub>2</sub> DCH <sub>2</sub> CN                                    | (a) (c)         |
| Carvajal et al. (2009)                 | <sup>13</sup> C-HCOOCH <sub>3</sub>                                                                                                              | (a) (c)         |
| Marcelino et al. (2009)                | HNCO                                                                                                                                             | (c)             |
| Margulès et al. (2010)                 | DCOOCH <sub>3</sub>                                                                                                                              | (a) (c)         |
| Tercero et al. (2012)                  | <sup>18</sup> O-HCOOCH <sub>3</sub>                                                                                                              | (a) (c)         |
| Motiyenko et al. (2012)                | NH <sub>2</sub> CHO, NH <sub>2</sub> CHO $v_{12}=1$                                                                                              | (a) (c)         |
| Coudert et al. (2013)                  | HCOOCH <sub>2</sub> D                                                                                                                            | (a) (c)         |
| Tercero et al. (2013)                  | CH <sub>3</sub> COOCH <sub>3</sub> , CH <sub>3</sub> CH <sub>2</sub> OCOH                                                                        | (a) (c)         |
| Cernicharo et al. (2013)               | NH <sub>3</sub> D <sup>+</sup>                                                                                                                   | (a) (c)         |
| Kolesníková et al. (2013)              | c-C <sub>6</sub> H <sub>5</sub> OH (not detected)                                                                                                | (a) (c)         |
| Haykal et al. (2013)                   | CH <sub>2</sub> CHCH <sub>2</sub> NC (not detected)                                                                                              | (a) (c)         |
| Bell et al. (2014)                     | CH <sub>3</sub> CN                                                                                                                               | (b) (c)         |
| Kolesníková et al. (2014)              | CH <sub>3</sub> CH <sub>2</sub> SH, CH <sub>3</sub> SH, CH <sub>3</sub> OH, <sup>13</sup> CH <sub>3</sub> OH, CH <sub>3</sub> CH <sub>2</sub> OH | (a) (c)         |
| Haykal et al. (2014)                   | <sup>13</sup> C-HCOOCH <sub>3</sub> $v_t=1$                                                                                                      | (a) (c)         |
| Tercero et al. (2015)                  | CH <sub>3</sub> CH <sub>2</sub> OCH <sub>3</sub>                                                                                                 | (c) (e)         |
| Kolesníková et al. (2015)              | CH <sub>3</sub> COOCH <sub>2</sub> (not detected)                                                                                                | (a) (c) (e)     |
| Alonso et al. (2015)                   | CH <sub>2</sub> CHCOOH (not detected)                                                                                                            | (a) (c) (e)     |
| López et al. in prep.                  | HCOOCH <sub>3</sub> $v_t=0,1,2$ , CH <sub>3</sub> COOH $v_t=0,1,2$ , CH <sub>2</sub> OHCHO                                                       | (c) (e)         |
| In progress                            | CH <sub>2</sub> OCH <sub>2</sub> , AG-OHCH <sub>2</sub> CH <sub>2</sub> OH                                                                       | (c)             |
| In progress                            | <sup>13</sup> C-CH <sub>3</sub> CN, CH <sub>3</sub> CN $v_8=1$                                                                                   | (c)             |
| In progress                            | CH <sub>3</sub> OCH <sub>3</sub> , CH <sub>3</sub> COCH <sub>3</sub> , H <sub>2</sub> <sup>13</sup> CO                                           | (c)             |

<sup>†</sup>: In this analysis we have include all isotopologues and vibrational excited states of the molecule. (a) - Papers in collaboration with spectroscopists. (b) - Papers dividing the analysis of the Orion surveys in different families of molecules. (c) - Papers based on the IRAM 30m 1D-survey (Tercero et al. 2010) and/or 2D-survey (Marcelino et al. in prep.). (d) - Papers based on Herschel/HIFI data. (e) - Papers based on ALMA SV data.
